# Supplementary material for: Visible-light-induced synthesis of a variety of trifluoromethylated alkenes from potassium vinyltrifluoroborates by photoredox catalysis
Source: Royal Society of Chemistry journal article supplement (doi:10.1039/c3cc39235j), 2013-01-01

*Supporting Information for*

**Visible-light-induced Synthesis of a Variety of Trifluoromethylated Alkenes  
from Potassium Vinyltrifluoroborates by Photoredox Catalysis**

Yusuke Yasu, Takashi Koike,\* and Munetaka Akita\*

**Contents**

|                                                                                                                                  |       |
|----------------------------------------------------------------------------------------------------------------------------------|-------|
| •Materials and methods                                                                                                           | • S2  |
| •Reaction apparatus                                                                                                              | • S2  |
| •Synthesis of potassium ( <i>E</i> )-vinyltrifluoroborate                                                                        | • S3  |
| •Typical NMR experimental procedure (reaction conditions in Table 1) and NMR spectra                                             | • S18 |
| •General procedure for the photocatalytic synthesis of ( <i>E</i> )-trifluoromethylated alkenes (reaction conditions in Table 2) | • S19 |
| •Gram-scale synthesis of <b>3s</b> (Scheme 2)                                                                                    | • S28 |
| •Crystallographic data for ( <i>E</i> )-3-(3,3,3-Trifluoroprop-1-enyl)-3-pyridinecarboxylic acid methy ester ( <b>3q</b> )       | • S29 |
| •Cyclic voltammograms                                                                                                            | • S38 |
| •References                                                                                                                      | • S39 |
| • <sup>1</sup> H and <sup>13</sup> C NMR spectra                                                                                 | • S40 |

## Materials and methods

[Ru(bpy)<sub>3</sub>](PF<sub>6</sub>)<sub>2</sub><sup>[1a]</sup> and [fac-Ir(ppy)<sub>3</sub>]<sup>[1b]</sup> were prepared according to the literature procedures. Togni's reagent (**1a**) was purchased from TCI. Potassium (*E*)-vinyltrifluoroborate, **2b**,<sup>[2a]</sup> **2c**,<sup>[2b]</sup> **2d**,<sup>[2c]</sup> **2f**<sup>[2b]</sup> and **2v**<sup>[2b]</sup> were prepared according to the literature procedures. Trifluoromethylated alkene **3v** was assigned by <sup>1</sup>H NMR spectroscopy based on the previous report.<sup>[2d]</sup> Catalytic reactions were performed under an atmosphere of nitrogen using standard Schlenk techniques unless otherwise noted. Methanol (dehydrated solvent, KANTO CHEMICAL CO., INC.) was degassed with ultrasonic bath, and stored under N<sub>2</sub> atmosphere. NMR solvents (CD<sub>3</sub>OD) was dried over molecular sieves 3 Å, degassed and stored under N<sub>2</sub>. Thin-layer chromatography was performed on Merck TLC plate with 60 F<sub>254</sub>. Visible light irradiations were performed with a Relyon LED lamp (3 W x 2; λ<sub>max</sub> = 425 nm). The <sup>1</sup>H NMR was acquired on Bruker AVANCE-400 (400 MHz). NMR chemical shifts were referenced to residual protio impurities in the deuterated solvent. HRMS (ESI-TOF Mass spectra) were obtained with a Bruker micrOTOF II. HRMS (EI Mass spectra) were recorded on a JEOL JMS-700 mass spectrometers at Center for Advanced Materials Analysis, Technical Department, Tokyo Institute of Technology. Single-crystal X-ray measurement was made on a Bruker SMART APEX II ULTRA. The crystallographic data for **3q** are summarized in Table S1-S5. The crystallographic data were deposited at the Cambridge Crystallographic Data Centre: CCDC 900630 (**3q**).

## Reaction apparatus

Irradiation of visible light was performed with a Relyon LED lamp (3 W x 2; λ<sub>max</sub> = 425 nm).

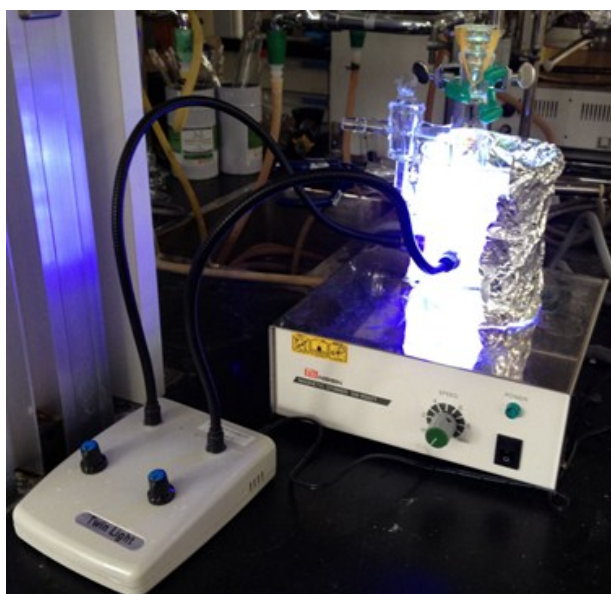

## Synthesis of potassium (*E*)-vinyltrifluoroborate

### Potassium (*E*)-2-(4-bromophenyl)ethenyltrifluoroborate (**2e**)

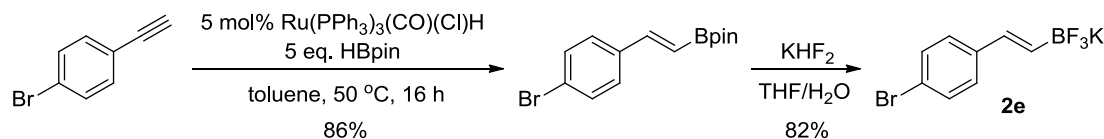

A 2-neck 100 mL round-bottom flask was charged with alkyne (1.15 g, 6.35 mmol), carbonylchlorohydridotris(triphenylphosphine)ruthenium (303 mg, 0.32 mmol) and dry toluene (26 mL), then 4,4,5,5-tetramethyl-1,3,2-dioxaborane (4.62 mL, 31.8 mmol, 5 eq.) was added to the mixture under N<sub>2</sub>. The reaction mixture was stirred at 50 °C for 16 h. After cooling to room temperature, the solvent was removed under vacuum. Resulting reaction mixture was diluted with Et<sub>2</sub>O, washed with sat. aq. NaHCO<sub>3</sub>, dried (Na<sub>2</sub>SO<sub>4</sub>), and filtered. The filtrate was concentrated *in vacuo* and the residue was purified by flash column chromatography on silica gel (hexane/AcOEt = 10/1) to afford the (*E*)-2-(4-bromostyryl)ethenylboronic acid pinacol ester as a white solid (1.69 g, 86% yield). The spectral data of the product were identical with those reported in the literature.

<sup>1</sup>H NMR (400 MHz, CDCl<sub>3</sub>, rt) δ 7.46 (dd, *J* = 6.8, 1.6 Hz, 2 H), 7.35–7.29 (m, 3 H), 6.14 (d, *J* = 18.4 Hz, 1 H), 1.30 (s, 12 H). <sup>11</sup>B NMR (125.7 MHz, CDCl<sub>3</sub>, rt) δ 29.6.

Ref.: H. Jang, A. R. Zhugralin, Y. Lee, A. H. Hoveyda, *J. Am. Chem. Soc.* **2011**, *133*, 7859–7871.

To a solution of (*E*)-2-(4-bromophenyl)ethenylboronic acid pinacol ester (1.69 g, 5.47 mmol) in dry THF (30 mL) was added a solution of KHF<sub>2</sub> (2.56 g, 32.8 mmol) in water (10 mL). The reaction mixture was stirred at room temperature for overnight. The mixture was concentrated *in vacuo*. The residue was dissolved in hot acetone, and filtered. The filtrate was reduced under vacuum to yield a mixture of potassium trifluoroborate and pinacol. The crude product was washed with ether and pentane for several times to afford the title compound as a white solid (1.3 g, 82% yield). The spectral data of the product were identical with those reported in the literature.

<sup>1</sup>H NMR (400 MHz, DMSO, rt) δ 7.41 (d, *J* = 8.4 Hz, 2 H), 7.26 (d, *J* = 8.4 Hz, 2 H), 6.42 (d, *J* = 18.4 Hz, 1 H), 6.20 (dq, *J* = 18.0, 3.2 Hz, 1 H). <sup>11</sup>B NMR (128.4 MHz, DMSO, rt) δ 2.36. <sup>19</sup>F NMR (376.5 MHz, DMSO, rt) δ -138.0.

Ref.: A. T. Parsons, T. D. Senecal, S. L. Buchwald, *Angew. Chem. Int. Ed.* **2012**, *51*, 2947–2950.

### Potassium (*E*)-2-(4-trifluoromethoxyphenyl)ethenyltrifluoroborate (**2g**)

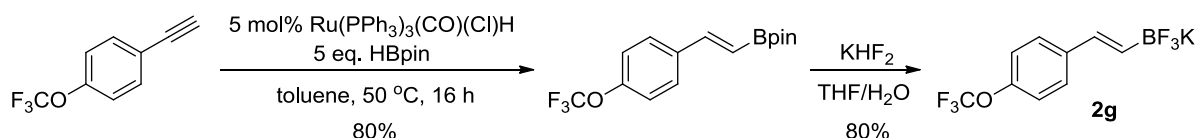

A 2-neck 100 mL round-bottom flask was charged with alkyne (1.0 g, 5.37 mmol), carbonylchlorohydridotris(triphenylphosphine)ruthenium (256 mg, 0.27 mmol) and dry toluene (21 mL), then 4,4,5,5-tetramethyl-1,3,2-dioxaborane (3.91 mL, 26.9 mmol, 5 eq.) was added to the mixture under N<sub>2</sub>. The reaction mixture was stirred at 50 °C for 16 h. After cooling to room

temperature, the solvent was removed under vacuum. Resulting reaction mixture was diluted with Et<sub>2</sub>O, washed with sat. aq. NaHCO<sub>3</sub>, dried (Na<sub>2</sub>SO<sub>4</sub>), and filtered. The filtrate was concentrated *in vacuo* and the residue was purified by flash column chromatography on silica gel (hexane/AcOEt = 10/1→4/1) to afford the (*E*)-2-(4-trifluoromethoxyphenyl)ethenylboronic acid pinacol ester as a pale yellow oil (1.35 g, 80% yield).

<sup>1</sup>H NMR (400 MHz, CDCl<sub>3</sub>, rt) δ 7.49 (dd, *J* = 6.8, 2.0 Hz, 2 H), 7.35 (d, *J* = 18.4 Hz, 1 H), 7.17 (d, *J* = 8.8 Hz, 2 H), 6.13 (d, *J* = 18.4 Hz, 1 H), 1.31 (s, 12 H). <sup>13</sup>C NMR (100 MHz, CDCl<sub>3</sub>, rt) δ 149.6, 147.8, 136.4, 128.4, 121.0, 120.6 (q, *J* = 256 Hz), 83.6, 24.9. <sup>11</sup>B NMR (125.7 MHz, CDCl<sub>3</sub>, rt) δ 30.0. HRMS (ESI-TOF): calculated for [C<sub>15</sub>H<sub>18</sub>BF<sub>3</sub>O<sub>3</sub>-H]<sup>+</sup> requires 313.1231, found 313.1230.

To a solution of (*E*)-2-(4-trifluoromethoxyphenyl)ethenylboronic acid pinacol ester (1.1 g, 3.5 mmol) in dry THF (20 mL) was added a solution of KHF<sub>2</sub> (1.64 g, 21 mmol) in water (10 mL). The reaction mixture was stirred at room temperature for overnight. The mixture was concentrated *in vacuo*. The residue was dissolved in hot acetone, and filtered. The filtrate was reduced under vacuum to yield a mixture of potassium trifluoroborate and pinacol. The crude product was diluted acetone, and excess amount of ether was added. The precipitate was filtered, washed with pentane for several times, and dried *in vacuo*. Resulting solid was wash with CH<sub>2</sub>Cl<sub>2</sub> to afford the title compound as a white solid (0.82 g, 80% yield).

<sup>1</sup>H NMR (400 MHz, acetone, rt) δ 7.41 (d, *J* = 8.0 Hz, 2 H), 7.17 (d, *J* = 8.0 Hz, 2 H), 6.68 (d, *J* = 18.4 Hz, 1 H), 6.20 (dq, *J* = 18.4, 3.6 Hz, 1 H). <sup>13</sup>C NMR (100 MHz, acetone, rt) δ 148.1, 141.1, 133.5, 127.8, 121.6, 121.5 (q, *J* = 253 Hz). <sup>11</sup>B NMR (128.4 MHz, acetone, rt) δ 3.06. <sup>19</sup>F NMR (376.5 MHz, acetone, rt) δ -58.6, -141.8. HRMS (ESI-TOF): calculated for [C<sub>9</sub>H<sub>6</sub>BF<sub>6</sub>O]<sup>+</sup> requires 255.0423, found 255.0442.

#### Potassium (*E*)-2-(4-cyanophenyl)ethenyltrifluoroborate (2h)

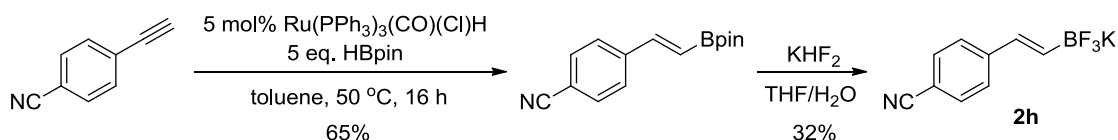

A 2-neck 100 mL round-bottom flask was charged with alkyne (1.0 g, 7.87 mmol), carbonylchlorohydridotris(triphenylphosphine)ruthenium (373 mg, 0.39 mmol) and dry toluene (31 mL), then 4,4,5,5-tetramethyl-1,3,2-dioxaborane (5.72 mL, 39.3 mmol, 5 eq.) was added to the mixture under N<sub>2</sub>. The reaction mixture was stirred at 50 °C for 16 h. After cooling to room temperature, the solvent was removed under vacuum. Resulting reaction mixture was diluted with Et<sub>2</sub>O, washed with sat. aq. NaHCO<sub>3</sub>, dried (Na<sub>2</sub>SO<sub>4</sub>), and filtered. The filtrate was concentrated *in vacuo* and the residue was purified by flash column chromatography on silica gel (hexane/AcOEt = 4/1) to afford the (*E*)-2-(4-cyanophenyl)ethenylboronic acid pinacol ester as a yellow solid (1.3 g, 65% yield).

<sup>1</sup>H NMR (400 MHz, CDCl<sub>3</sub>, rt) δ 7.62 (d, *J* = 8.4 Hz, 2 H), 7.54 (d, *J* = 8.4 Hz, 2 H), 7.36 (d, *J* = 18.4 Hz, 1 H), 6.27 (d, *J* = 18.4 Hz, 1 H), 1.31 (s, 12 H). <sup>11</sup>B NMR (125.7 MHz, CDCl<sub>3</sub>, rt) δ 29.3.

To a solution of (*E*)-2-(4-cyanophenyl)ethenylboronic acid pinacol ester (1.3 g, 5.1 mmol) in



dry THF (20 mL) was added a solution of  $\text{KHF}_2$  (2.39 g, 31 mmol) in water (10 mL). The reaction mixture was stirred at room temperature for overnight. The mixture was concentrated *in vacuo*. The residue was dissolved in hot acetone, and filtered. The filtrate was reduced under vacuum to yield a mixture of potassium trifluoroborate and pinacol. The crude product was washed with ether, pentane and  $\text{CH}_2\text{Cl}_2$  for several times to afford the title compound as a yellow solid (0.38 g, 32 % yield).

$^1\text{H}$  NMR (400 MHz, DMSO, rt)  $\delta$  7.67 (d,  $J$  = 8.4 Hz, 2 H), 7.49 (d,  $J$  = 8.4 Hz, 2 H), 6.53 (d,  $J$  = 18.4 Hz, 1 H), 6.42 (dq,  $J$  = 18.4, 3.2 Hz, 1 H).  $^{13}\text{C}$  NMR (100 MHz, DMSO, rt)  $\delta$  144.9, 132.1, 131.8, 126.0, 119.2, 107.8.  $^{11}\text{B}$  NMR (128.4 MHz, DMSO, rt)  $\delta$  2.42.  $^{19}\text{F}$  NMR (376.5 MHz, DMSO, rt)  $\delta$  -138.4. HRMS (ESI-TOF): calculated for  $[\text{C}_9\text{H}_6\text{BF}_3\text{N}]^-$  requires 196.0553, found 196.0560.

#### Potassium (*E*)-2-(3,5-difluorophenyl)ethenyltrifluoroborate (2i)

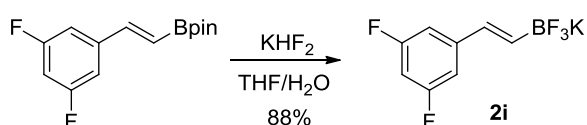

To a solution of (*E*)-2-(3,5-difluorophenyl)ethenylboronic acid pinacol ester (1.0 g, 3.75 mmol) in dry THF (20 mL) was added a solution of  $\text{KHF}_2$  (1.76 g, 23 mmol) in water (10 mL). The reaction mixture was stirred at room temperature for 5 h. The mixture was concentrated *in vacuo*. The residue was dissolved in hot acetone, and filtered. The filtrate was reduced under vacuum to yield a mixture of potassium trifluoroborate and pinacol. The crude product was washed with ether and pentane for several times to afford the title compound as a white solid (0.81 g, 88% yield).

$^1\text{H}$  NMR (400 MHz, DMSO, rt)  $\delta$  7.00 (d,  $J$  = 7.6 Hz, 2 H), 6.90 (dd,  $J$  = 9.2, 2.0 Hz, 1 H), 6.46 (d,  $J$  = 18.4 Hz, 1 H), 6.32 (dq,  $J$  = 18.4, 3.6 Hz, 1 H).  $^{13}\text{C}$  NMR (100 MHz, DMSO, rt)  $\delta$  162.6 (d,  $J$  = 293 Hz), 162.5 (d,  $J$  = 293 Hz), 144.5, 131.1, 107.9 (d,  $J$  = 18.2 Hz), 107.8 (d,  $J$  = 18.2 Hz), 100.8 (d,  $J$  = 26.0 Hz), 100.5 (d,  $J$  = 26.0 Hz).  $^{11}\text{B}$  NMR (128.4 MHz, DMSO, rt)  $\delta$  2.46.  $^{19}\text{F}$  NMR (376.5 MHz, DMSO, rt)  $\delta$  -111.0 (d,  $J$  = 8.66 Hz), -138.2. HRMS (ESI-TOF): calculated for  $[\text{C}_8\text{H}_5\text{BF}_5]^-$  requires 207.0411, found 207.0453.

#### Potassium (*E*)-2-[3,5-bis(trifluoromethyl)phenyl]ethenyltrifluoroborate (2j)

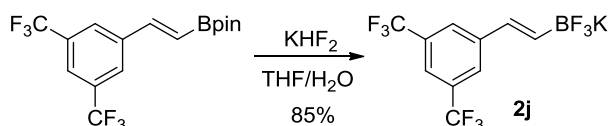

To a solution of (*E*)-2-[3,5-bis(trifluoromethyl)phenyl]ethenylboronic acid pinacol ester (1.0 g, 2.73 mmol) in dry THF (20 mL) was added a solution of  $\text{KHF}_2$  (1.3 g, 16 mmol) in water (10 mL). The reaction mixture was stirred at room temperature for 5 h. The mixture was concentrated *in vacuo*. The residue was dissolved in hot acetone, and filtered. The filtrate was reduced under vacuum to yield a pale yellow oil. The crude oil was diluted ether, and excess amount of pentane was added. The precipitate was filtered and washed with pentane for several times. The resulting solid was dried *in vacuo* to afford the title compound as a white solid (0.80 g, 85% yield).

**<sup>1</sup>H NMR** (400 MHz, DMSO, rt)  $\delta$  7.94 (s, 2 H), 7.76 (s, 1 H), 6.66 (d,  $J$  = 18.4 Hz, 1 H), 6.50 (dq,  $J$  = 18.4, 3.6 Hz, 1 H). **<sup>13</sup>C NMR** (100 MHz, DMSO, rt)  $\delta$  142.9, 130.4, 130.3 (q,  $J$  = 32.2 Hz), 125.5, 123.5 (q,  $J$  = 271 Hz), 118.8. **<sup>11</sup>B NMR** (128.4 MHz, DMSO, rt)  $\delta$  2.16. **<sup>19</sup>F NMR** (376.5 MHz, DMSO, rt)  $\delta$  -61.4, -138.5. **HRMS** (ESI-TOF): calculated for  $[\text{C}_{10}\text{H}_5\text{BF}_9]^-$  requires 307.0348, found 307.0358.

**Potassium (*E*)-2-(3-*tert*-butoxycarbonylaminophenyl)ethenyltrifluoroborate (2k)**

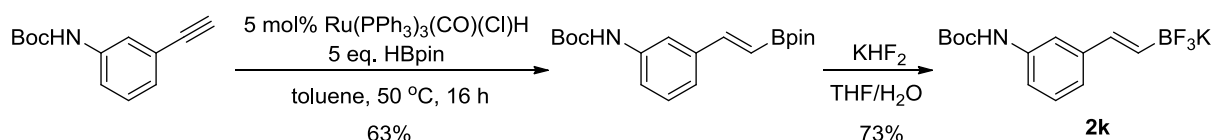

A 2-neck 100 mL round-bottom flask was charged with Boc-protected alkyne<sup>[3]</sup> (2.0 g, 9.2 mmol), carbonylchlorohydridotris(triphenylphosphine)ruthenium (447 mg, 0.47 mmol) and dry toluene (37 mL), then 4,4,5,5-tetramethyl-1,3,2-dioxaborane (6.8 mL, 46.8 mmol, 5 eq.) was added to the mixture under  $\text{N}_2$ . The reaction mixture was stirred at 50 °C for 16 h. After cooling to room temperature, the solvent was removed under vacuum. Resulting reaction mixture was diluted with  $\text{Et}_2\text{O}$ , washed with sat. aq.  $\text{NaHCO}_3$ , dried ( $\text{Na}_2\text{SO}_4$ ), and filtered. The filtrate was concentrated *in vacuo* and the residue was purified by flash column chromatography on silica gel (pentane/ $\text{Et}_2\text{O}$  = 10/1→9/1→4/1) to afford the (*E*)-2-(3-*tert*-butoxycarbonylaminophenyl)ethenylboronic acid pinacol ester as a white solid (2.0 g, 63% yield).

**<sup>1</sup>H NMR** (400 MHz,  $\text{CDCl}_3$ , rt)  $\delta$  7.45 (s, 1 H), 7.38-7.22 (m, 3 H), 7.16 (d,  $J$  = 7.6 Hz, 1 H), 6.46 (bs, 1 H), 6.15 (d,  $J$  = 18.4 Hz, 1 H), 1.51 (s, 9 H), 1.30 (s, 12 H). **<sup>13</sup>C NMR** (100 MHz,  $\text{CDCl}_3$ , rt)  $\delta$  152.8, 149.3, 138.8, 138.6, 129.2, 121.9, 119.2, 117.2, 83.4, 80.7, 28.4, 24.9. **<sup>11</sup>B NMR** (125.7 MHz,  $\text{CDCl}_3$ , rt)  $\delta$  30.5. **HRMS** (ESI-TOF): calculated for  $[\text{C}_{19}\text{H}_{28}\text{BNO}_4+\text{H}]^+$  requires 344.2195, found 344.2196.

To a solution of (*E*)-2-(3-*tert*-butoxycarbonylaminophenyl)ethenylboronic acid pinacol ester (1.2 g, 3.5 mmol) in dry THF (20 mL) was added a solution of  $\text{KHF}_2$  (1.64 g, 21 mmol) in water (10 mL). The reaction mixture was stirred at room temperature for overnight. The mixture was concentrated *in vacuo*. The residue was dissolved in hot acetone, and filtered. The filtrate was reduced under vacuum to yield a mixture of potassium trifluoroborate and pinacol. The crude product was washed with ether, pentane and  $\text{CH}_2\text{Cl}_2$  for several times to afford the title compound as a white solid (0.82 g, 73 % yield).

**<sup>1</sup>H NMR** (400 MHz, DMSO, rt)  $\delta$  7.37 (s, 1 H), 7.25 (d,  $J$  = 8.0 Hz, 1 H), 7.10 (dd,  $J$  = 8.0, 7.6 Hz, 1 H), 6.88 (d,  $J$  = 7.6 Hz, 1 H), 6.37 (d,  $J$  = 18.0 Hz, 1 H), 6.10 (dq,  $J$  = 18.0, 3.2 Hz, 1 H), 1.47 (s, 9 H). **<sup>13</sup>C NMR** (100 MHz, DMSO, rt)  $\delta$  152.7, 140.7, 139.4, 133.1, 133.0, 128.2, 119.4, 115.8, 115.1, 78.7, 39.5, 28.1. **<sup>11</sup>B NMR** (128.4 MHz, DMSO, rt)  $\delta$  2.70. **<sup>19</sup>F NMR** (376.5 MHz, DMSO, rt)  $\delta$  -138.0. **HRMS** (ESI-TOF): calculated for  $[\text{C}_{13}\text{H}_{16}\text{BF}_3\text{NO}_2]^-$  requires 286.1234, found 286.1233.

### Potassium (*E*)-2-(2-tolyl)ethenyltrifluoroborate (2l)

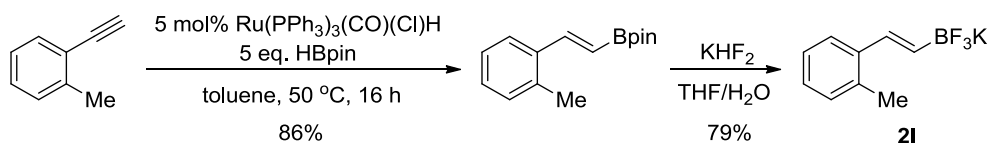

A 2-neck 100 mL round-bottom flask was charged with alkyne (1.0 g, 8.61 mmol), carbonylchlorohydridotris(triphenylphosphine)ruthenium (407 mg, 0.43 mmol) and dry toluene (35 mL), then 4,4,5,5-tetramethyl-1,3,2-dioxaborane (6.25 mL, 43 mmol, 5 eq.) was added to the mixture under  $\text{N}_2$ . The reaction mixture was stirred at 50 °C for 16 h. After cooling to room temperature, the solvent was removed under vacuum. Resulting reaction mixture was diluted with  $\text{Et}_2\text{O}$ , washed with sat. aq.  $\text{NaHCO}_3$ , dried ( $\text{Na}_2\text{SO}_4$ ), and filtered. The filtrate was concentrated *in vacuo* and the residue was purified by flash column chromatography on silica gel (hexane/ $\text{AcOEt}$  = 9/1→4/1) to afford the (*E*)-2-(2-tolyl)ethenylboronic acid pinacol ester as a pale yellow solid (1.8 g, 86% yield). The spectral data of the product were identical with those reported in the literature.

$^1\text{H}$  NMR (400 MHz,  $\text{CDCl}_3$ , rt)  $\delta$  7.64 (d,  $J$  = 18.0 Hz, 1 H), 7.55 (d,  $J$  = 5.6 Hz, 1 H), 7.20-7.12 (m, 3 H), 6.08 (d,  $J$  = 18.0 Hz, 1 H), 1.31 (s, 12 H).  $^{11}\text{B}$  NMR (125.7 MHz,  $\text{CDCl}_3$ , rt)  $\delta$  29.8.

Ref.: H. Jang, A. R. Zhugralin, Y. Lee, A. H. Hoveyda, *J. Am. Chem. Soc.* **2011**, *133*, 7859–7871.

To a solution of (*E*)-2-(2-tolyl)ethenylboronic acid pinacol ester (1.80 g, 7.37 mmol) in dry THF (30 mL) was added a solution of  $\text{KHF}_2$  (3.46 g, 44.2 mmol) in water (10 mL). The reaction mixture was stirred at room temperature for overnight. The mixture was concentrated *in vacuo*. The residue was dissolved in hot acetone, and filtered. The filtrate was reduced under vacuum to yield a mixture of potassium trifluoroborate and pinacol. The crude product was washed with ether, pentane and  $\text{CH}_2\text{Cl}_2$  for several times to afford the title compound as a white solid (1.3 g, 79% yield).

$^1\text{H}$  NMR (400 MHz, DMSO, rt)  $\delta$  7.38 (d,  $J$  = 7.6 Hz, 1 H), 7.11-6.99 (m, 3 H), 6.68 (d,  $J$  = 18.0 Hz, 1 H), 6.06 (dq,  $J$  = 18.0, 3.2 Hz, 1 H), 2.25 (s, 3 H).  $^{13}\text{C}$  NMR (100 MHz, DMSO, rt)  $\delta$  139.2, 133.5, 130.2 (d,  $J$  = 4.0 Hz), 129.7, 125.6, 125.4, 124.4, 19.3.  $^{11}\text{B}$  NMR (128.4 MHz, DMSO, rt)  $\delta$  2.55.  $^{19}\text{F}$  NMR (376.5 MHz, DMSO, rt)  $\delta$  -137.7. HRMS (ESI-TOF): calculated for  $[\text{C}_9\text{H}_9\text{BF}_3]^-$  requires 185.0757, found 185.0759.

### Potassium (*E*)-2-(3-pyridine)ethenyltrifluoroborate (2n)

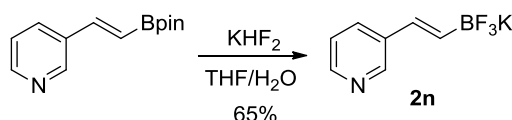

To a solution of (*E*)-3-[2-(4,4,5,5-tetramethyl-1,3,2-dioxaborolan-2-yl)vinyl]pyridine<sup>[4]</sup> (2.2 g, 9.5 mmol) in dry THF (35 mL) was added a solution of  $\text{KHF}_2$  (4.5 g, 57 mmol) in water (10 mL). The reaction mixture was stirred at room temperature for 5 h. The mixture was concentrated *in vacuo*. The residue was dissolved in hot acetone, and filtered. The filtrate was reduced under vacuum to yield a mixture of potassium trifluoroborate and pinacol. The crude product was washed with ether, pentane

and CH<sub>2</sub>Cl<sub>2</sub> for several times to afford the title compound as a pale yellow solid (1.3 g, 65 % yield).

<sup>1</sup>H NMR (400 MHz, DMSO, rt) δ 8.47 (s, 1 H), 8.31 (dd, *J* = 4.8, 1.6 Hz, 1 H), 7.73 (dd, *J* = 8.0, 1.6 Hz, 1 H), 7.26 (dd, *J* = 8.0, 4.8 Hz, 1 H), 6.48 (d, *J* = 18.4 Hz, 1 H), 6.33 (dq, *J* = 18.0, 3.2 Hz, 1 H).

<sup>13</sup>C NMR (100 MHz, DMSO, rt) δ 147.4, 146.9, 135.4, 131.7, 129.7, 129.6, 123.5. <sup>11</sup>B NMR (128.4 MHz, DMSO, rt) δ 2.38. <sup>19</sup>F NMR (376.5 MHz, DMSO, rt) δ -138.2.

HRMS (ESI-TOF): calculated for [C<sub>7</sub>H<sub>6</sub>BF<sub>3</sub>N]<sup>+</sup> requires 172.0552, found 172.0560.

### Potassium (*E*)-2-[4-(2-chloropyridine)]ethenyltrifluoroborate (2o)

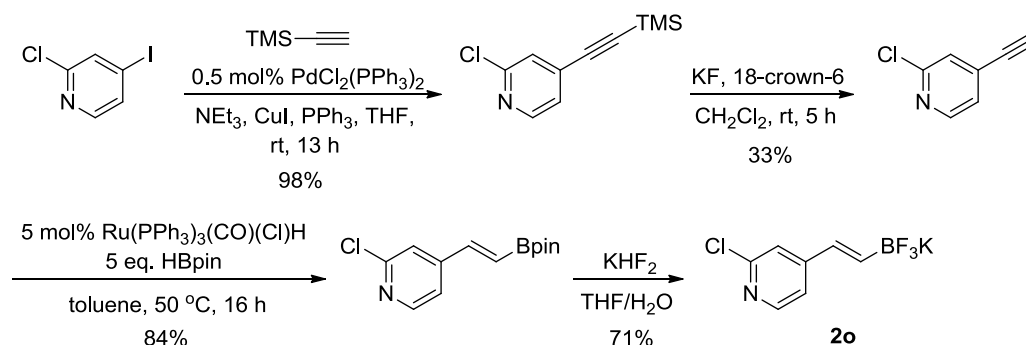

A 2-neck 300 mL round-bottom flask was charged with 4-iodo-2-chloropyridine (5.0 g, 20.9 mmol), PdCl<sub>2</sub>(PPh<sub>3</sub>)<sub>2</sub> (77 mg, 0.11 mmol), PPh<sub>3</sub> (55 mg, 0.22 mmol), dry THF (16 mL) and NEt<sub>3</sub> (25 mL) under N<sub>2</sub>. After bubbling N<sub>2</sub> into the solution for 15 min, CuI (40 mg, 0.33 mmol) and trimethylsilylacetylene (3.3 mL, 23.0 mmol) were added sequentially. The reaction mixture was stirred at room temperature. After 13 h, the precipitate (NEt<sub>3</sub>•HI) was filtered off and washed with EtOAc. The filtrate solution was concentrated and residue was diluted with ether/hexane. The crude product was purified by flash column chromatography on silica gel (hexane→ hexane/AcOEt = 9/1) to afford the 4-TMS-ethynyl-2-chloropyridine as a pale yellow oil (4.30 g, 98% yield). The spectral data of the product were identical with those reported in the literature.

<sup>1</sup>H NMR (400 MHz, CDCl<sub>3</sub>, rt) δ 8.32 (dd, *J* = 5.2, 0.8 Hz, 1 H), 7.35 (dd, *J* = 1.2, 0.8 Hz, 1 H), 7.21 (dd, *J* = 5.2, 1.2 Hz, 1 H), 0.25 (s, 9 H).

Ref.: Y. Takayama, T. Hanazawa, T. Andou, K. Muraoka, H. Ohtani, M. Takahashi, F. Sato, *Org. Lett.* **2004**, *6*, 4253–4256.

A 2-neck 100 mL round-bottom flask was charged with TMS-alkyne (4.3 g, 20.5 mmol), 18-crown-6-ether (5.42 g, 20.5 mmol) and dry CH<sub>2</sub>Cl<sub>2</sub> (28 mL), then KF (2.38 g, 41 mmol) was added to the mixture under N<sub>2</sub>. The reaction mixture was stirred at room temperature for 5 h. Resulting reaction mixture was extracted with CH<sub>2</sub>Cl<sub>2</sub>, dried (Na<sub>2</sub>SO<sub>4</sub>), and filtered. The filtrate was concentrated *in vacuo* and the residue was purified by flash column chromatography on silica gel (pentane/Et<sub>2</sub>O = 4/1) to afford the 4-ethynyl-2-chloropyridine as a colorless crystal (0.94 g, 33% yield). The spectral data of the product were identical with those reported in the literature.

<sup>1</sup>H NMR (400 MHz, CDCl<sub>3</sub>, rt) δ 8.37 (dd, *J* = 4.8, 0.4 Hz, 1 H), 7.39 (br s, 1 H), 7.27 (dd, *J* = 5.2, 1.6 Hz, 1 H), 3.35 (s, 1 H).

Ref.: A. Conte, H. Kuehne, T. Luebbers, P. Mattei, C. Maugeais, W. Mueller, P. Pflieger, Patent:

US2007/185058 A1, 2007, 12.

A 2-neck 100 mL round-bottom flask was charged with 4-ethynyl-2-chloropyridine (0.82 g, 8.96 mmol), carbonylchlorohydridotris(triphenylphosphine)ruthenium (281 mg, 0.30 mmol) and dry toluene (23 mL), then 4,4,5,5-tetramethyl-1,3,2-dioxaborane (4.3 mL, 29.8 mmol, 5 eq.) was added to the mixture under N<sub>2</sub>. The reaction mixture was stirred at 50 °C for 16 h. After cooling to room temperature, the solvent was removed under vacuum. Resulting reaction mixture was diluted with Et<sub>2</sub>O, washed with sat. aq. NaHCO<sub>3</sub>, dried (Na<sub>2</sub>SO<sub>4</sub>), and filtered. The filtrate was concentrated *in vacuo* and the residue was purified by flash column chromatography on silica gel (hexane/AcOEt = 9/1→4/1) to afford the (*E*)-4-[2-(4,4,5,5-tetramethyl-1,3,2-dioxaborolan-2-yl)vinyl]-2-chloropyridine as a colorless oil (1.34 g, 84% yield).

<sup>1</sup>H NMR (400 MHz, CDCl<sub>3</sub>, rt) δ 8.39 (d, *J* = 4.8 Hz, 1 H), 7.38 (d, *J* = 0.8 Hz, 1 H), 7.29 (dd, *J* = 5.6, 1.6 Hz, 1 H), 7.28 (d, *J* = 18.4 Hz, 1 H), 6.41 (d, *J* = 18.4, 1 H). <sup>13</sup>C NMR (100 MHz, CDCl<sub>3</sub>, rt) δ 152.2, 150.0, 147.8, 144.9, 121.8, 119.8, 83.9, 24.8. <sup>11</sup>B NMR (128.4 MHz, CDCl<sub>3</sub>, rt) δ 29.5.

HRMS (ESI-TOF): calculated for [C<sub>13</sub>H<sub>17</sub>ClBNO<sub>2</sub>]<sup>+</sup> requires 266.1127, found 266.1198.

To a solution of (*E*)-4-[2-(4,4,5,5-tetramethyl-1,3,2-dioxaborolan-2-yl)vinyl]-2-chloropyridine (1.2 g, 4.52 mmol) in dry THF (20 mL) was added a solution of KHF<sub>2</sub> (2.30 g, 29.4 mmol) in water (10 mL). The reaction mixture was stirred at room temperature for overnight. The mixture was concentrated *in vacuo*. The residue was dissolved in hot acetone, and filtered. The filtrate was reduced under vacuum to yield a mixture of potassium trifluoroborate and pinacol. The crude product was washed with ether, pentane and CH<sub>2</sub>Cl<sub>2</sub> for several times to afford the title compound as a white solid (0.79 g, 71% yield).

<sup>1</sup>H NMR (400 MHz, DMSO, rt) δ 8.21 (d, *J* = 5.2 Hz, 1 H), 7.35-7.33 (m, 2 H), 6.61 (dq, *J* = 18.0, 3.2 Hz, 1 H), 6.45 (q, *J* = 18.0 Hz, 2 H). <sup>13</sup>C NMR (100 MHz, DMSO, rt) δ 151.1, 150.9, 149.6, 130.0, 120.3, 119.4. <sup>11</sup>B NMR (128.4 MHz, DMSO, rt) δ 1.90. <sup>19</sup>F NMR (376.5 MHz, DMSO, rt) δ -138.7.

HRMS (ESI-TOF): calculated for [C<sub>7</sub>H<sub>5</sub>ClBF<sub>3</sub>N]<sup>+</sup> requires 206.0162, found 206.0166.

### Potassium (*E*)-2-[3-(2-cyanopyridine)]ethynyltrifluoroborate (2p)

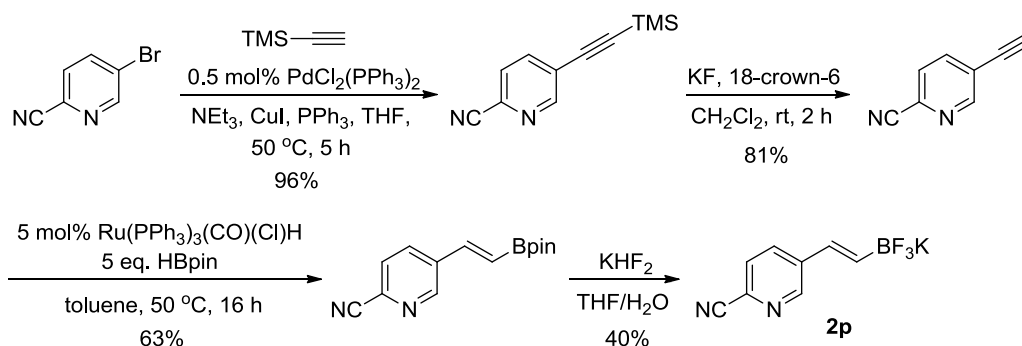

A 2-neck 300 mL round-bottom flask was charged with 5-bromo-2-cyanopyridine (5.0 g, 27.3 mmol), PdCl<sub>2</sub>(PPh<sub>3</sub>)<sub>2</sub> (111 mg, 0.158 mmol), PPh<sub>3</sub> (86 mg, 0.328 mmol), dry THF (25 mL) and NEt<sub>3</sub> (37 mL) under N<sub>2</sub>. After bubbling N<sub>2</sub> into the solution for 15 min, CuI (64 mg, 0.33 mmol) and trimethylsilylacetylene (4.8 mL, 34 mmol) were added sequentially. The reaction mixture was stirred

at 50 °C for 5 h. After cooling to room temperature, the precipitate (NEt<sub>3</sub>•HBr) was filtered off and washed with EtOAc. The filtrate solution was concentrated and residue was diluted with ether/hexane. The crude product was purified by flash column chromatography on silica gel (hexane→hexane/AcOEt = 4/1) to afford the 5-TMS-ethynyl-2-cyanopyridine as a pale yellow solid (5.27 g, 96% yield). The spectral data of the product were identical with those reported in the literature.

**<sup>1</sup>H NMR** (400 MHz, CDCl<sub>3</sub>, rt) δ 8.73 (dd, *J* = 2.0, 0.8 Hz, 1 H), 7.84 (dd, *J* = 8.4, 2.0 Hz, 1 H), 7.62 (dd, *J* = 8.4, 0.8 Hz, 1 H), 0.27 (s, 9 H).

Ref.: A. A. Farahat, A. Kumar, M. Say, A. E.-D. M. Barghash, F. E. Goda, H. M. Eisa, T. Wenzler, R. Brun, Y. Liu, L. Mickelson, W. D. Wilson, D. W. Boykin, *Bioorganic & Medicinal Chemistry*, **2010**, *18*, 557–566.

A 2-neck 100 mL round-bottom flask was charged with TMS-alkyne (4.0 g, 20.0 mmol), 18-crown-6-ether (5.28 g, 20.0 mmol) and dry CH<sub>2</sub>Cl<sub>2</sub> (30 mL), then KF (2.32 g, 40 mmol) was added to the mixture under N<sub>2</sub>. The reaction mixture was stirred at room temperature for 2 h. Resulting reaction mixture was extracted with CH<sub>2</sub>Cl<sub>2</sub>, dried (Na<sub>2</sub>SO<sub>4</sub>), and filtered. The filtrate was concentrated *in vacuo* and the residue was purified by flash column chromatography on silica gel (pentane/Et<sub>2</sub>O = 4/1→2/1) to afford the 5-ethynyl-2-cyanopyridine as an orange solid (2.08 g, 81% yield). The spectral data of the product were identical with those reported in the literature.

**<sup>1</sup>H NMR** (400 MHz, CDCl<sub>3</sub>, rt) δ 8.77 (dd, *J* = 2.0, 1.0 Hz, 1 H), 7.90 (dd, *J* = 8.0, 2.0 Hz, 1 H), 7.66 (dd, *J* = 8.0, 1.0 Hz, 1 H), 3.45 (s, 1 H).

Ref.: A. A. Farahat, A. Kumar, M. Say, A. E.-D. M. Barghash, F. E. Goda, H. M. Eisa, T. Wenzler, R. Brun, Y. Liu, L. Mickelson, W. D. Wilson, D. W. Boykin, *Bioorganic & Medicinal Chemistry*, **2010**, *18*, 557–566.

A 2-neck 100 mL round-bottom flask was charged with 5-ethynyl-2-cyanopyridine (1.2 g, 9.36 mmol), carbonylchlorohydridotris(triphenylphosphine)ruthenium (447 mg, 0.47 mmol) and dry toluene (37 mL), then 4,4,5,5-tetramethyl-1,3,2-dioxaborane (6.8 mL, 46.8 mmol, 5 eq.) was added to the mixture under N<sub>2</sub>. The reaction mixture was stirred at 50 °C for 16 h. After cooling to room temperature, the solvent was removed under vacuum. Resulting reaction mixture was diluted with Et<sub>2</sub>O, washed with sat. aq. NaHCO<sub>3</sub>, dried (Na<sub>2</sub>SO<sub>4</sub>), and filtered. The filtrate was concentrated *in vacuo* and the residue was purified by flash column chromatography on silica gel (hexane/AcOEt = 10/1→4/1) to afford the (*E*)-3-[2-(4,4,5,5-tetramethyl-1,3,2-dioxaborolan-2-yl)vinyl]-2-cyanopyridine as a white solid (1.50 g, 63% yield).

**<sup>1</sup>H NMR** (400 MHz, CDCl<sub>3</sub>, rt) δ 8.76 (d, *J* = 2.0 Hz, 1 H), 7.87 (dd, *J* = 8.4, 2.0 Hz, 1 H), 7.66 (d, *J* = 8.4 Hz, 1 H), 7.36 (d, *J* = 18.4 Hz, 1 H), 6.38 (d, *J* = 18.4, 1 H). **<sup>13</sup>C NMR** (100 MHz, CDCl<sub>3</sub>, rt) δ 150.1, 143.5, 136.2, 134.0, 133.2, 128.4, 117.3, 84.1, 24.9. **<sup>11</sup>B NMR** (128.4 MHz, CDCl<sub>3</sub>, rt) δ 29.3.

**HRMS** (ESI-TOF): calculated for [C<sub>14</sub>H<sub>17</sub>BN<sub>2</sub>O<sub>2</sub>-H]<sup>+</sup> requires 255.1313, found 255.1310.

To a solution of (*E*)-3-[2-(4,4,5,5-tetramethyl-1,3,2-dioxaborolan-2-yl)vinyl]-2-cyanopyridine (1.3 g, 5.47 mmol) in dry THF (20 mL) was added a solution of KHF<sub>2</sub> (2.38 g, 30.5 mmol) in water (10 mL). The reaction mixture was stirred at room temperature for 5 h. The mixture was concentrated *in vacuo*. The residue was dissolved in hot acetone, and filtered. The filtrate was reduced



under vacuum to yield a mixture of potassium trifluoroborate and pinacol. The crude product was washed with ether, pentane and CH<sub>2</sub>Cl<sub>2</sub> for several times to afford the title compound as a white solid (0.48 g, 40% yield).

<sup>1</sup>H NMR (400 MHz, DMSO, rt) δ 8.67 (d, *J* = 2.0 Hz, 1 H), 7.95 (dd, *J* = 8.4, 2.0 Hz, 1 H), 7.86 (d, *J* = 8.4 Hz, 1 H), 6.61-6.58 (m, 2 H). <sup>13</sup>C NMR (100 MHz, DMSO, rt) δ 148.8, 139.0, 132.7, 129.1, 128.7, 128.5, 117.8. <sup>11</sup>B NMR (128.4 MHz, DMSO, rt) δ 2.35. <sup>19</sup>F NMR (376.5 MHz, DMSO, rt) δ -138.8. HRMS (ESI-TOF): calculated for [C<sub>8</sub>H<sub>5</sub>BF<sub>3</sub>N]<sup>-</sup> requires 197.0505, found 197.0508.

### Potassium (*E*)-2-[3-(3-pyridinecarboxylic acid methyl ester)]ethenyltrifluoroborate (2q)

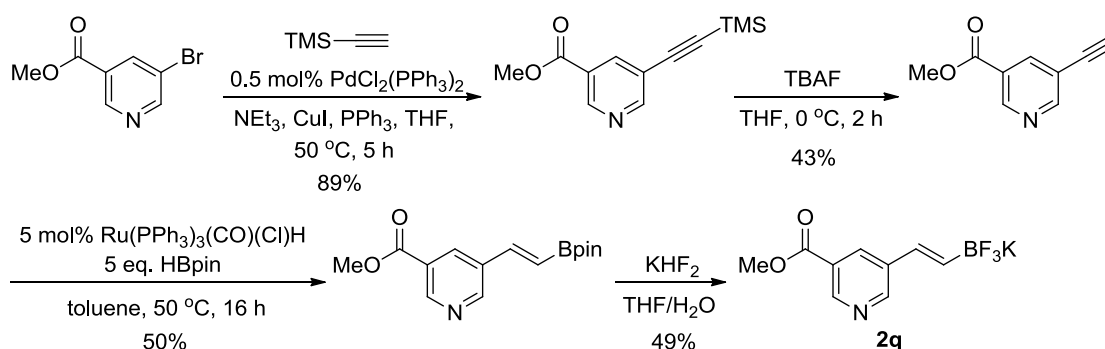

A 2-neck 300 mL round-bottom flask was charged with 5-bromo-3-pyridinecarboxylic acid methyl ester (2.5 g, 11.6 mmol), PdCl<sub>2</sub>(PPh<sub>3</sub>)<sub>2</sub> (39 mg, 0.056 mmol), PPh<sub>3</sub> (30 mg, 0.11 mmol), dry THF (25 mL) and NEt<sub>3</sub> (13 mL) under N<sub>2</sub>. After bubbling N<sub>2</sub> into the solution for 15 min, CuI (22 mg, 0.11 mmol) and trimethylsilylacetylene (1.8 mL, 12.7 mmol) were added sequentially. The reaction mixture was stirred at 50 °C for 5 h. After cooling to room temperature, the precipitate (NEt<sub>3</sub>•HBr) was filtered off and washed with EtOAc. The filtrate solution was concentrated and residue was diluted with ether/hexane. The crude product was purified by flash column chromatography on silica gel (hexane→hexane/AcOEt = 10/1→4/1) to afford the 5-TMS-ethynyl-3-pyridinecarboxylic acid methyl ester as a pale yellow solid (2.42 g, 89% yield).

<sup>1</sup>H NMR (400 MHz, CDCl<sub>3</sub>, rt) δ 9.10 (d, *J* = 2.0 Hz, 1 H), 8.81 (d, *J* = 2.0 Hz, 1 H), 8.33 (dd, *J* = 2.0, 2.0 Hz, 1 H), 3.95 (s, 3 H), 0.27 (s, 9 H).

A 2-neck 100 mL round-bottom flask was charged with TMS-alkyne (1.86 g, 7.9 mmol), and dry THF (15 mL), then TBAF(1.0 M THF soln.) (13 mL, 13 mmol) was added to the solution at 0 °C under N<sub>2</sub>. The reaction mixture was stirred at 0 °C for 1 h. The reaction mixture was extracted with CH<sub>2</sub>Cl<sub>2</sub>, dried (Na<sub>2</sub>SO<sub>4</sub>), and filtered. The filtrate was concentrated *in vacuo* and the residue was purified by flash column chromatography on silica gel (hexane/AcOEt = 4/1→3/1) to afford the 5-ethynyl-3-pyridinecarboxylic acid methyl ester as a white solid (0.72 g, 43% yield). The spectral data of the product were identical with those reported in the literature.

<sup>1</sup>H NMR (400 MHz, CDCl<sub>3</sub>, rt) δ 9.15 (d, *J* = 2.4 Hz, 1 H), 8.85 (d, *J* = 2.0 Hz, 1 H), 8.36 (dd, *J* = 2.4, 2.0 Hz, 1 H), 3.96 (s, 3 H), 3.27 (s, 1 H).

Ref.: S. L. Bender, D. Bhumralkar, M. R. Collins, S. J. Cripps, J. G. Deal, L. Jia, M. D. Nambu, C. L. Palmer, Z. Peng, M. D. Varney, Patent: US2002/103203 A1, **2002**.



A 2-neck 100 mL round-bottom flask was charged with 5-ethynyl-3-pyridinecarboxylic acid methyl ester (1.22 g, 7.57 mmol), carbonylchlorohydridotris(triphenylphosphine)ruthenium (358 mg, 0.38 mmol) and dry toluene (31 mL), then 4,4,5,5-tetramethyl-1,3,2-dioxaborane (5.5 mL, 37.9 mmol, 5 eq.) was added to the mixture under N<sub>2</sub>. The reaction mixture was stirred at 50 °C for 16 h. After cooling to room temperature, the solvent was removed under vacuum. Resulting reaction mixture was diluted with Et<sub>2</sub>O, washed with sat. aq. NaHCO<sub>3</sub>, dried (Na<sub>2</sub>SO<sub>4</sub>), and filtered. The filtrate was concentrated *in vacuo* and the residue was purified by flash column chromatography on silica gel (hexane→hexane/AcOEt = 9/1→4/1) to afford the (*E*)-3-[2-(4,4,5,5-tetramethyl-1,3,2-dioxaborolan-2-yl)vinyl]-3-pyridinecarboxylic acid methyl ester as a white solid (1.10 g, 50% yield).

<sup>1</sup>H NMR (400 MHz, CDCl<sub>3</sub>, rt) δ 9.11 (d, *J* = 2.0 Hz, 1 H), 8.82 (d, *J* = 2.4 Hz, 1 H), 8.39 (dd, *J* = 2.4, 2.0 Hz, 1 H), 7.40 (d, *J* = 18.8 Hz, 1 H), 6.34 (d, *J* = 18.8 Hz, 1 H), 3.96 (s, 3 H), 1.32 (s, 9 H).

<sup>13</sup>C NMR (100 MHz, CDCl<sub>3</sub>, rt) δ 165.7, 152.4, 150.6, 144.5, 134.3, 133.0, 126.2, 83.8, 52.6, 24.9.

<sup>11</sup>B NMR (128.4 MHz, CDCl<sub>3</sub>, rt) δ 28.5. HRMS (ESI-TOF): calculated for [C<sub>15</sub>H<sub>20</sub>BNO<sub>4</sub>-H]<sup>-</sup> requires 288.1415, found 288.1463.

To a solution of (*E*)-3-[2-(4,4,5,5-tetramethyl-1,3,2-dioxaborolan-2-yl)vinyl]-3-pyridinecarboxylic acid methyl ester (1.0 g, 3.45 mmol) in dry THF (20 mL) was added a solution of KHF<sub>2</sub> (1.62 g, 20.8 mmol) in water (10 mL). The reaction mixture was stirred at room temperature for 5 h. The mixture was concentrated *in vacuo*. The residue was dissolved in hot acetone, and filtered. The filtrate was reduced under vacuum to yield a mixture of potassium trifluoroborate and pinacol. The crude product was washed with ether, pentane and CH<sub>2</sub>Cl<sub>2</sub> for several times to afford the title compound as a white solid (0.45 g, 49% yield).

<sup>1</sup>H NMR (400 MHz, DMSO, rt) δ 8.82 (d, *J* = 1.6 Hz, 1 H), 8.72 (d, *J* = 2.0 Hz, 1 H), 8.15 (dd, *J* = 2.0, 1.6 Hz, 1 H), 6.56 (d, *J* = 18.4 Hz, 1 H), 6.42 (dq, *J* = 18.4, 3.6 Hz, 1 H), 3.88 (s, 3 H). <sup>13</sup>C NMR (100 MHz, DMSO, rt) δ 165.4, 151.0, 146.9, 135.4, 131.8, 128.3, 125.3, 52.1. <sup>11</sup>B NMR (128.4 MHz, DMSO, rt) δ 2.27. <sup>19</sup>F NMR (376.5 MHz, DMSO, rt) δ -138.5. HRMS (ESI-TOF): calculated for [C<sub>9</sub>H<sub>8</sub>BF<sub>3</sub>NO<sub>2</sub>]<sup>-</sup> requires 230.0607, found 230.0610.

### Potassium (*E*)-2-[6-(2-methylquinoline)]ethenyltrifluoroborate (2r)

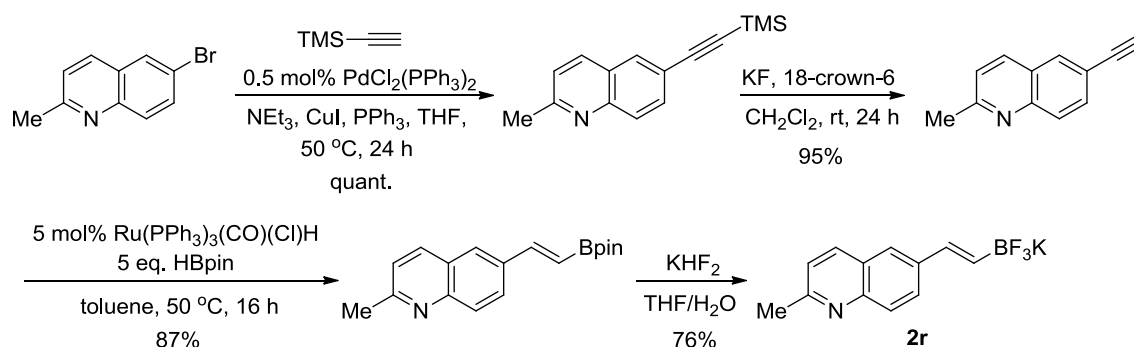

A 2-neck 300 mL round-bottom flask was charged with 6-bromo-2-methylquinoline (5.0 g, 22.5 mmol), PdCl<sub>2</sub>(PPh<sub>3</sub>)<sub>2</sub> (79 mg, 0.112 mmol), PPh<sub>3</sub> (59 mg, 0.225 mmol), dry THF (21 mL) and NEt<sub>3</sub> (30 mL) under N<sub>2</sub>. After bubbling N<sub>2</sub> into the solution for 15 min, CuI (43 mg, 0.225 mmol) and

trimethylsilylacetylene (3.5 mL, 24.8 mmol) were added sequentially. The reaction mixture was stirred at 50 °C for 24 h. After cooling to room temperature, the precipitate ( $\text{NEt}_3 \cdot \text{HBr}$ ) was filtered off and washed with EtOAc. The filtrate solution was concentrated and residue was diluted with ether/hexane. The crude product was purified by flash column chromatography on silica gel (hexane  $\rightarrow$  hexane/AcOEt = 4/1) to afford the 6-TMS-ethynyl-2-methylquinoline as a pale yellow solid (5.5 g, quant.). The spectral data of the product were identical with those reported in the literature.

**$^1\text{H}$  NMR** (400 MHz,  $\text{CDCl}_3$ , rt)  $\delta$  7.96 (d,  $J$  = 8.4 Hz, 1 H), 7.92-7.90 (m, 2 H), 7.70 (d,  $J$  = 8.8 Hz, 1 H), 7.28 (d,  $J$  = 8.4 Hz, 1 H), 2.73 (s, 3 H), 0.27 (s, 9 H).

Ref.: CENTRE NATIONAL DE LA RECHERCHE SCIENTIFIQUE, P. Dalko, M. Petit, D. Ogden, F. Acher, WO2011/86469 A1, 40.

A 2-neck 100 mL round-bottom flask was charged with TMS-alkyne (3.0 g, 12.5 mmol), 18-crown-6-ether (3.3 g, 12.5 mmol) and dry  $\text{CH}_2\text{Cl}_2$  (20 mL), then KF (1.45 g, 25 mmol) was added to the mixture under  $\text{N}_2$ . The reaction mixture was stirred at room temperature for 24 h. Resulting reaction mixture was extracted with  $\text{CH}_2\text{Cl}_2$ , dried ( $\text{Na}_2\text{SO}_4$ ), and filtered. The filtrate was concentrated in vacuo and the residue was purified by flash column chromatography on silica gel (pentane/ $\text{Et}_2\text{O}$  = 4/1  $\rightarrow$  3/1) to afford the 6-ethynyl-2-methylquinoline as a white solid (1.99 g, 95% yield). The spectral data of the product were identical with those reported in the literature.

**$^1\text{H}$  NMR** (400 MHz,  $\text{CDCl}_3$ , rt)  $\delta$  8.00-7.93 (m, 3 H), 7.71 (dd,  $J$  = 8.4, 2.0 Hz, 1 H), 7.29 (d,  $J$  = 8.8, Hz, 1 H), 3.15 (s, 1 H), 2.74 (s, 3 H).

Ref.: CENTRE NATIONAL DE LA RECHERCHE SCIENTIFIQUE, P. Dalko, M. Petit, D. Ogden, F. Acher, WO2011/86469 A1, 40.

A 2-neck 100 mL round-bottom flask was charged with 6-ethynyl-2-methylquinoline (1.5 g, 8.97 mmol), carbonylchlorohydridotris(triphenylphosphine)ruthenium (427 mg, 0.45 mmol) and dry toluene (36 mL), then 4,4,5,5-tetramethyl-1,3,2-dioxaborane (6.5 mL, 45 mmol, 5 eq.) was added to the mixture under  $\text{N}_2$ . The reaction mixture was stirred at 50 °C for 16 h. After cooling to room temperature, the solvent was removed under vacuum. Resulting reaction mixture was diluted with  $\text{Et}_2\text{O}$ , washed with sat. aq.  $\text{NaHCO}_3$ , dried ( $\text{Na}_2\text{SO}_4$ ), and filtered. The filtrate was concentrated in vacuo and the residue was purified by flash column chromatography on silica gel (hexane/AcOEt = 10/1  $\rightarrow$  4/1  $\rightarrow$  2/1  $\rightarrow$  1/1) to afford the (*E*)-6-[2-(4,4,5,5-tetramethyl-1,3,2-dioxaborolan-2-yl)vinyl]-2-methylquinoline as a white solid (2.3 g, 87% yield).

**$^1\text{H}$  NMR** (400 MHz,  $\text{CDCl}_3$ , rt)  $\delta$  8.01 (dd,  $J$  = 8.4, 3.6 Hz, 1 H), 7.96 (d,  $J$  = 8.8 Hz, 1 H), 7.87 (dd,  $J$  = 8.8, 1.6 Hz, 1 H), 7.76 (s, 1 H), 7.54 (d,  $J$  = 18.4 Hz, 1 H), 7.29-7.25 (m, 1 H), 6.28 (d,  $J$  = 18.4, 1 H), 2.72 (s, 3 H), 1.32 (s, 12 H).  **$^{13}\text{C}$  NMR** (100 MHz,  $\text{CDCl}_3$ , rt)  $\delta$  159.4, 148.7, 148.3, 136.5, 135.0, 129.0, 127.3, 127.1, 126.5, 122.4, 83.5, 25.0, 24.9.  **$^{11}\text{B}$  NMR** (128.4 MHz,  $\text{CDCl}_3$ , rt)  $\delta$  29.8. **HRMS (ESI-TOF)**: calculated for  $[\text{C}_{18}\text{H}_{22}\text{BNO}_2\text{-H}]^-$  requires 294.1674, found 294.1643.

To a solution of (*E*)-6-[2-(4,4,5,5-tetramethyl-1,3,2-dioxaborolan-2-yl)vinyl]-2-methylquinoline (1.3 g, 4.4 mmol) in dry THF (10 mL) was added a solution of  $\text{KHF}_2$  (2.06 g, 26.4 mmol) in water (10 mL). The reaction mixture was stirred at room temperature for 5 h. The mixture was

concentrated in vacuo. The residue was dissolved in hot acetone, and filtered. The filtrate was reduced under vacuum to yield a mixture of potassium trifluoroborate and pinacol. The crude product was washed with ether, pentane and CH<sub>2</sub>Cl<sub>2</sub> for several times to afford the title compound as a white solid (0.92 g, 76% yield).

<sup>1</sup>H NMR (400 MHz, DMSO, rt) δ 8.14 (d, *J* = 8.4 Hz, 1 H), 7.82-7.76 (m, 2 H), 7.67 (s, 1 H), 7.33 (d, *J* = 8.4 Hz, 1 H), 6.64 (d, *J* = 18.0 Hz, 1 H), 6.35 (dq, *J* = 18.0, 3.6 Hz, 1 H). <sup>13</sup>C NMR (100 MHz, DMSO, rt) δ 157.2, 146.5, 137.5, 135.7, 132.4, 127.9, 126.9, 126.4, 123.5, 121.9, 24.6. <sup>11</sup>B NMR (128.4 MHz, DMSO, rt) δ 2.40. <sup>19</sup>F NMR (376.5 MHz, DMSO, rt) δ -137.9. HRMS (ESI-TOF): calculated for [C<sub>12</sub>H<sub>10</sub>BF<sub>3</sub>N]<sup>+</sup> requires 236.0866, found 236.0873.

### Potassium (*E*)-2-[6-(2-methylquinoline)]ethenyltrifluoroborate (2s)

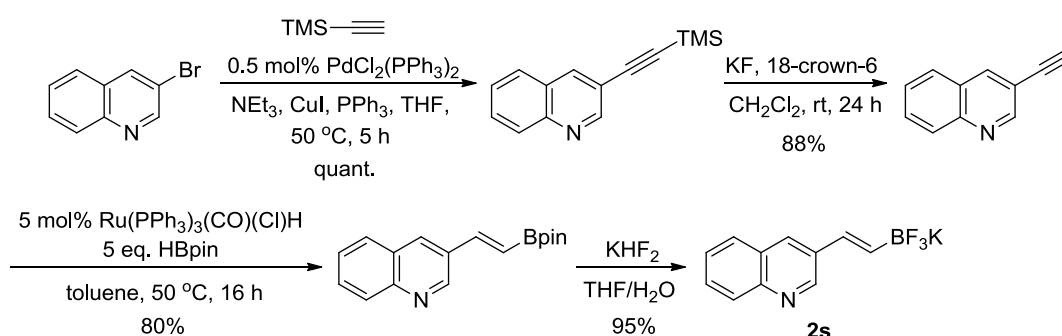

A 2-neck 300 mL round-bottom flask was charged with 3-bromoquinoline (6.0 g, 28.8 mmol), PdCl<sub>2</sub>(PPh<sub>3</sub>)<sub>2</sub> (82 mg, 0.117 mmol), PPh<sub>3</sub> (61 mg, 0.233 mmol), dry THF (18 mL) and NEt<sub>3</sub> (27 mL) under N<sub>2</sub>. After bubbling N<sub>2</sub> into the solution for 15 min, CuI (44 mg, 0.233 mmol) and trimethylsilylacetylene (4.5 mL, 31.7 mmol) were added sequentially. The reaction mixture was stirred at 50 °C for 24 h. After cooling to room temperature, the precipitate (NEt<sub>3</sub>•HBr) was filtered off and washed with EtOAc. The filtrate solution was concentrated and residue was diluted with ether/hexane. The crude product was purified by flash column chromatography on silica gel (hexane → hexane/AcOEt = 9/1) to afford the 3-TMS-ethynylquinoline as a brown oil (6.7 g, quant.). The spectral data of the product were identical with those reported in the literature.

<sup>1</sup>H NMR (400 MHz, CDCl<sub>3</sub>, rt) δ 8.91 (d, *J* = 2.0 Hz, 1 H), 8.24 (br s, 1 H), 8.07 (d, *J* = 8.4 Hz, 1 H), 7.75 (d, *J* = 8.0 Hz, 1 H), 7.70 (dd, *J* = 8.0, 8.4 Hz, 1 H), 7.54 (dd, *J* = 8.4, 8.0 Hz, 1 H), 0.29 (s, 9 H). Ref.: T. Li, L. Guo, Y. Zhang, J. Wang, Z. Li, L. Lin, Z. Zhang, L. Li, J. Lin, W. Zhao, J. Li, P. G. Wang, Carbohydrate Research, **2011**, 346, 1083–1092.

A 2-neck 100 mL round-bottom flask was charged with TMS-alkyne (6.7 g, 29.7 mmol), 18-crown-6-ether (7.86 g, 29.7 mmol) and dry CH<sub>2</sub>Cl<sub>2</sub> (40 mL), then KF (3.45 g, 59.4 mmol) was added to the mixture under N<sub>2</sub>. The reaction mixture was stirred at room temperature for 24 h. Resulting reaction mixture was extracted with CH<sub>2</sub>Cl<sub>2</sub>, dried (Na<sub>2</sub>SO<sub>4</sub>), and filtered. The filtrate was concentrated in vacuo and the residue was purified by flash column chromatography on silica gel (pentane/Et<sub>2</sub>O = 4/1 → 3/2) to afford the 3-ethynyl-quinoline as a pale yellow solid (4.0 g, 88% yield). The spectral data of the product were identical with those reported in the literature.

<sup>1</sup>H NMR (400 MHz, CDCl<sub>3</sub>, rt) δ 8.94 (d, *J* = 2.0 Hz, 1 H), 8.28 (br s, 1 H), 8.09 (d, *J* = 8.4 Hz, 1 H),

7.78 (d,  $J = 8.0$  Hz, 1 H), 7.73 (dd,  $J = 7.6, 7.2$  Hz, 1 H), 7.57 (dd,  $J = 7.6, 7.2$  Hz, 1 H), 3.27 (s, 1 H).

Ref.: N. S. Gulykina, T.M. Dolgina, G. N. Bondarenko, and I. P. Beletskaya, *Russian Journal of Organic Chemistry*, **2003**, 39, 797–807.

A 2-neck 100 mL round-bottom flask was charged with 6-ethynyl-2-methylquinoline (1.5 g, 9.79 mmol), carbonylchlorohydridotris(triphenylphosphine)ruthenium (464 mg, 0.49 mmol) and dry toluene (39 mL), then 4,4,5,5-tetramethyl-1,3,2-dioxaborane (7.1 mL, 49 mmol, 5 eq.) was added to the mixture under  $N_2$ . The reaction mixture was stirred at 50 °C for 16 h. After cooling to room temperature, the solvent was removed under vacuum. Resulting reaction mixture was diluted with  $Et_2O$ , washed with sat. aq.  $NaHCO_3$ , dried ( $Na_2SO_4$ ), and filtered. The filtrate was concentrated in vacuo and the residue was purified by flash column chromatography on silica gel (hexane/ $AcOEt = 9/1 \rightarrow 4/1$ ) to afford the (*E*)-3-[2-(4,4,5,5-tetramethyl-1,3,2-dioxaborolan-2-yl)vinyl]quinoline as a yellow solid (2.2 g, 80% yield).

$^1H$  NMR (400 MHz,  $CDCl_3$ , rt)  $\delta$  9.08 (dd,  $J = 1.6$  Hz, 1 H), 8.15 (br s, 1 H), 8.07 (d,  $J = 8.4$  Hz, 1 H), 7.82 (d,  $J = 8.4$  Hz, 1 H), 7.69 (dd,  $J = 7.6, 7.6$  Hz, 1 H), 7.60–7.52 (m, 2 H), 6.41 (d,  $J = 18.8$ , 1 H), 1.33 (s, 12 H).  $^{13}C$  NMR (100 MHz,  $CDCl_3$ , rt)  $\delta$  149.6, 148.2, 146.0, 133.7, 130.4, 129.8, 129.4, 128.3, 128.0, 127.1, 83.7, 24.9.  $^{11}B$  NMR (128.4 MHz,  $CDCl_3$ , rt)  $\delta$  29.4. HRMS (ESI-TOF): calculated for  $[C_{17}H_{20}BNO_2-H]^-$  requires 280.1517, found 281.1541.

To a solution of (*E*)-3-[2-(4,4,5,5-tetramethyl-1,3,2-dioxaborolan-2-yl)vinyl]quinoline (2.0 g, 7.1 mmol) in dry THF (28 mL) was added a solution of  $KHF_2$  (3.33 g, 42.7 mmol) in water (10 mL). The reaction mixture was stirred at room temperature for overnight. The mixture was concentrated in vacuo. The residue was dissolved in hot acetone, and filtered. The filtrate was reduced under vacuum to yield a mixture of potassium trifluoroborate and pinacol. The crude product was washed with ether, pentane and  $CH_2Cl_2$  for several times to afford the title compound as a white solid (1.77 g, 95% yield).  $^1H$  NMR (400 MHz, DMSO, rt)  $\delta$  8.97 (s, 1 H), 8.14 (s, 1 H), 7.94 (d,  $J = 8.4$  Hz, 1 H), 7.91 (d,  $J = 8.0$  Hz, 1 H), 7.64 (m, 1 H), 7.53 (dd,  $J = 8.0, 8.0$  Hz, 1 H), 6.68 (d,  $J = 18.4$  Hz, 1 H), 6.53 (dq,  $J = 18.4, 3.2$  Hz, 1 H).  $^{13}C$  NMR (100 MHz, DMSO, rt)  $\delta$  149.4, 146.3, 132.9, 130.1, 129.8, 128.5, 128.1, 128.0, 127.8, 126.4.  $^{11}B$  NMR (128.4 MHz, DMSO, rt)  $\delta$  2.51.  $^{19}F$  NMR (376.5 MHz, DMSO, rt)  $\delta$  -138.2. HRMS (ESI-TOF): calculated for  $[C_{11}H_8BF_3N]^-$  requires 222.0709, found 222.0746.

### Potassium (*E*)-2-[5-(2-methylbenzothiazole)]ethenyltrifluoroborate (2t)

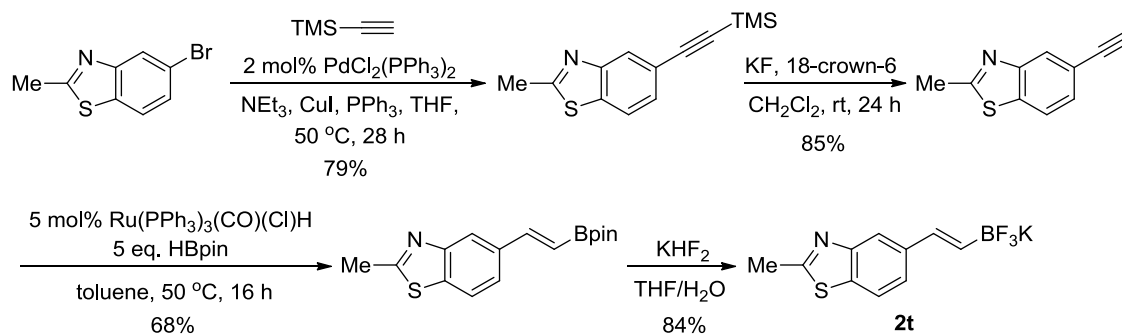

A 2-neck 300 mL round-bottom flask was charged with 5-bromo-2-methylbenzothiazole (5.0 g, 21.9 mmol),  $PdCl_2(PPh_3)_2$  (294 mg, 0.42 mmol),  $PPh_3$  (220 mg, 0.84 mmol), dry THF (17 mL) and  $NEt_3$

(25 mL) under N<sub>2</sub>. After bubbling N<sub>2</sub> into the solution for 15 min, CuI (160 mg, 0.84 mmol) and trimethylsilylacetylene (3.4 mL, 24.1 mmol) were added sequentially. The reaction mixture was stirred at 50 °C for 28 h. After cooling to room temperature, the precipitate (NEt<sub>3</sub>•HBr) was filtered off and washed with EtOAc. The filtrate solution was concentrated and residue was precipitated with ether/pentane. The crude product was washed with ether/pentane (1/1) for several times to afford the 5-TMS-ethynyl-2-methylbenzothiazole as a pale pink solid (4.2 g, 79% yield).

**<sup>1</sup>H NMR** (400 MHz, CDCl<sub>3</sub>, rt) δ 8.02 (d, *J* = 1.4 Hz, 1 H), 7.72 (dd, *J* = 8.0, 0.4 Hz, 1 H), 7.43 (dd, *J* = 8.0, 1.4 Hz, 1 H), 2.83 (s, 3 H), 0.27 (s, 9 H). **<sup>13</sup>C NMR** (100 MHz, CDCl<sub>3</sub>, rt) δ 168.0, 153.3, 136.1, 128.4, 125.9, 121.3, 121.0, 104.8, 94.5, 20.3, 0.11. **HRMS (ESI-TOF)**: calculated for [C<sub>13</sub>H<sub>15</sub>NSSi+H]<sup>+</sup> requires 246.0767, found 246.0768.

A 2-neck 100 mL round-bottom flask was charged with TMS-alkyne (2.5 g, 10.2 mmol), 18-crown-6-ether (2.7 g, 10.2 mmol) and dry CH<sub>2</sub>Cl<sub>2</sub> (15 mL), then KF (1.2 g, 20.4 mmol) was added to the mixture under N<sub>2</sub>. The reaction mixture was stirred at room temperature for 24 h. Resulting reaction mixture was extracted with CH<sub>2</sub>Cl<sub>2</sub>, dried (Na<sub>2</sub>SO<sub>4</sub>), and filtered. The filtrate was concentrated *in vacuo* and the residue was purified by flash column chromatography on silica gel (pentane/Et<sub>2</sub>O = 4/1→3/2) to afford the 5-ethynyl-2-methylbenzothiazole as a yellow solid (1.50 g, 85% yield).

**<sup>1</sup>H NMR** (400 MHz, CDCl<sub>3</sub>, rt) δ 8.05 (d, *J* = 1.2 Hz, 1 H), 7.74 (d, *J* = 8.4 Hz, 1 H), 7.44 (dd, *J* = 8.4, 1.2 Hz, 1 H), 3.11 (s, 1 H), 2.82 (s, 1 H). **<sup>13</sup>C NMR** (100 MHz, CDCl<sub>3</sub>, rt) δ 168.3, 153.3, 136.5, 128.4, 126.2, 121.4, 119.9, 83.5, 77.4, 20.3. **HRMS (ESI-TOF)**: calculated for [C<sub>10</sub>H<sub>7</sub>NS+H]<sup>+</sup> requires 174.0372, found 174.0356.

A 2-neck 100 mL round-bottom flask was charged with 5-ethynyl-2-methylbenzothiazole (1.30 g, 7.5 mmol), carbonylchlorohydridotris(triphenylphosphine)ruthenium (356 mg, 0.375 mmol) and dry toluene (30 mL), then 4,4,5,5-tetramethyl-1,3,2-dioxaborane (5.4 mL, 37.5 mmol, 5 eq.) was added to the mixture under N<sub>2</sub>. The reaction mixture was stirred at 50 °C for 16 h. After cooling to room temperature, the solvent was removed under vacuum. Resulting reaction mixture was diluted with Et<sub>2</sub>O, washed with sat. aq. NaHCO<sub>3</sub>, dried (Na<sub>2</sub>SO<sub>4</sub>), and filtered. The filtrate was concentrated *in vacuo* and the residue was purified by flash column chromatography on silica gel (pentane→pentane/Et<sub>2</sub>O = 4/1→3/2) to afford the (*E*)-5-[2-(4,4,5,5-tetramethyl-1,3,2-dioxaborolan-2-yl)vinyl]-2-methylbenzothiazole as a yellow solid (1.54 g, 68% yield).

**<sup>1</sup>H NMR** (400 MHz, CDCl<sub>3</sub>, rt) δ 8.01 (d, *J* = 1.2 Hz, 1 H), 7.75 (d, *J* = 8.4 Hz, 1 H), 7.53-7.47 (m, 2 H), 6.2 (d, *J* = 18.0 Hz, 1 H), 2.82 (s, 3 H), 1.32 (s, 9 H). **<sup>13</sup>C NMR** (100 MHz, CDCl<sub>3</sub>, rt) δ 167.7, 154.0, 149.1, 136.3, 136.1, 123.5, 121.4, 121.2, 83.5, 24.9, 20.2. **<sup>11</sup>B NMR** (128.4 MHz, CDCl<sub>3</sub>, rt) δ 29.5. **HRMS (ESI-TOF)**: calculated for [C<sub>16</sub>H<sub>20</sub>BNO<sub>2</sub>S-H]<sup>-</sup> requires 300.1238, found 300.1220.

To a solution of (*E*)-5-[2-(4,4,5,5-tetramethyl-1,3,2-dioxaborolan-2-yl)vinyl]-2-methylbenzothiazole (1.2 g, 3.98 mmol) in dry THF (20 mL) was added a solution of KHF<sub>2</sub> (1.87 g, 23.9 mmol) in water (10 mL). The reaction mixture was stirred at room temperature for overnight. The mixture was concentrated *in vacuo*. The residue was dissolved in hot acetone, and filtered. The filtrate was reduced

under vacuum to yield a mixture of potassium trifluoroborate and pinacol. The crude product was washed with ether, pentane and CH<sub>2</sub>Cl<sub>2</sub> for several times to afford the title compound as a pale pink solid (0.94 g, 84% yield).

**<sup>1</sup>H NMR** (400 MHz, DMSO, rt)  $\delta$  7.85 (d,  $J$  = 8.0 Hz, 1 H), 7.75 (d,  $J$  = 1.2 Hz, 1 H), 7.40 (dd,  $J$  = 8.4, 1.6 Hz, 1 H), 6.56 (d,  $J$  = 18.4 Hz, 1 H), 6.26 (dq,  $J$  = 18.4, 3.2 Hz, 1 H), 2.76 (s, 3 H). **<sup>13</sup>C NMR** (100 MHz, DMSO, rt)  $\delta$  166.6, 153.6, 138.8, 132.6, 132.4, 122.4, 121.2, 118.3, 19.6. **<sup>11</sup>B NMR** (128.4 MHz, DMSO, rt)  $\delta$  2.80. **<sup>19</sup>F NMR** (376.5 MHz, DMSO, rt)  $\delta$  -137.8.

**HRMS** (ESI-TOF): calculated for [C<sub>10</sub>H<sub>8</sub>BF<sub>3</sub>NS]<sup>-</sup> requires 242.0430, found 242.0436.

#### Potassium (*E*)-3-phenyl-1-propen-1-yltrifluoroborate (**2u**)

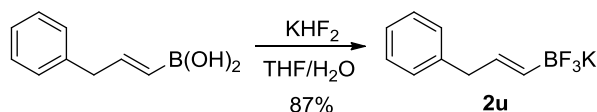

To a solution of (*E*)-3-phenyl-1-propen-1-ylboronic acid (1.0 g, 6.17 mmol) in dry THF (30 mL) was added a solution of KHF<sub>2</sub> (2.9 g, 37 mmol) in water (15 mL). The reaction mixture was stirred at room temperature for 4 h. The mixture was concentrated *in vacuo*. The residue was dissolved in hot acetone, and filtered. The filtrate was reduced under vacuum to yield a mixture of potassium trifluoroborate and pinacol. The crude product was washed with ether, pentane and CH<sub>2</sub>Cl<sub>2</sub> for several times to afford the title compound as a white solid (1.2 g, 87% yield).

**<sup>1</sup>H NMR** (400 MHz, DMSO, rt)  $\delta$  7.28-7.23 (m, 2 H), 7.16-7.12 (m, 3 H), 5.66-5.58 (m, 1 H), 5.35-5.28 (m, 1 H), 3.21 (d,  $J$  = 6.4 Hz, 2 H). **<sup>13</sup>C NMR** (100 MHz, DMSO, rt)  $\delta$  141.8, 132.4, 128.3, 127.9, 125.4, 41.9. **<sup>11</sup>B NMR** (128.4 MHz, DMSO, rt)  $\delta$  2.41. **<sup>19</sup>F NMR** (376.5 MHz, DMSO, rt)  $\delta$  -137.4. **HRMS** (ESI-TOF): calculated for [C<sub>9</sub>H<sub>9</sub>BF<sub>3</sub>]<sup>-</sup> requires 185.0757, found 185.0765.

**Typical NMR experimental procedure (reaction conditions in Table 1) and NMR spectra**  
*photocatalytic trifluoromethylation of (E)-styryltrifluoroborate (2a)*

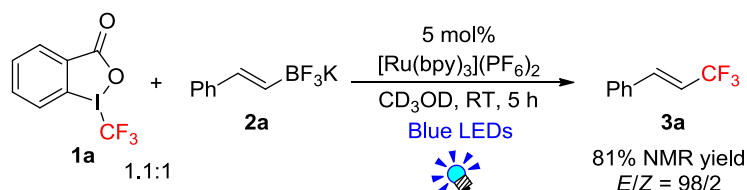

Under N<sub>2</sub>, [Ru(bpy)<sub>3</sub>](PF<sub>6</sub>)<sub>2</sub> (1.0 mg, 1.25 μmol), Togi's reagent (**1a**) (8.7 mg, 27.5 μmol), (E)-styryltrifluoroborate (**2a**) (5.4 mg, 25 μmol), SiEt<sub>4</sub> (~1 μL) as an internal standard, CD<sub>3</sub>OD (0.5 mL) were added to the NMR tube. The reaction was carried out at room temperature (water bath) under irradiation of visible light (placed at a distance of ~3 cm from Blue LED lamp:  $h\nu = 425 \pm 15$  nm).

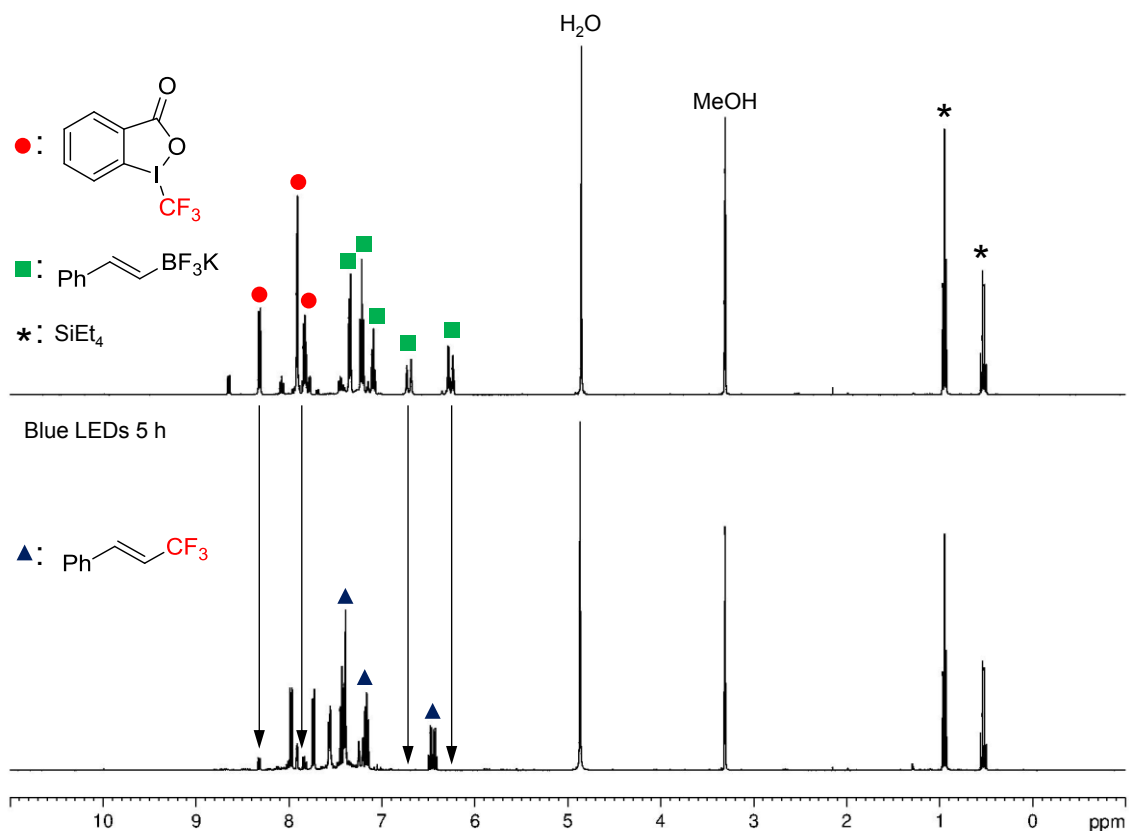

Figure S1. <sup>1</sup>H NMR spectra (400 MHz, CD<sub>3</sub>OD, rt)



## General procedure for the photocatalytic synthesis of trifluoromethylated alkenes (reaction conditions in Table 2)

### General procedure A

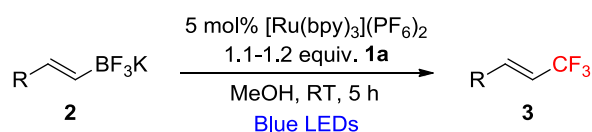

20 mL-Schlenk tube was charged with Togni's reagent (**1a**) (0.275–0.30 mmol, 1.1 eq–1.2 eq),  $[\text{Ru}(\text{bpy})_3](\text{PF}_6)_2$  (10.7 mg, 12.5  $\mu\text{mol}$ , 5 mol%), vinylborate (**2**) (0.25 mmol, 1.0 eq) and MeOH (5.0–10.0 mL) under  $\text{N}_2$ . The vinylborate (**2**) was dissolved with ultrasonic bath. The tube was placed at a distance of 2–3 cm from 3W Blue LED lamp ( $h\nu = 425 \pm 15 \text{ nm}$ ). The red solution was stirred at room temperature (water bath) under visible light irradiation. After 5 h, aqueous saturated  $\text{NaHCO}_3$  solution was added. The resulting mixture was extracted with ether or pentane, dried ( $\text{Na}_2\text{SO}_4$ ), and filtered. The filtrate was concentrated *in vacuo* and the residue was purified by chromatography on silica gel to afford trifluoromethylated alkene.

### General procedure B

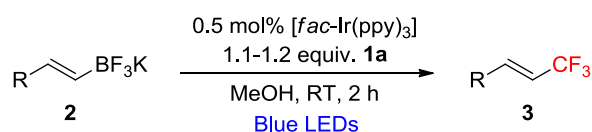

20 mL-Schlenk tube was charged with Togni's reagent (**1a**) (0.275–0.30 mmol, 1.1 eq–1.2 eq),  $[\text{fac-Ir}(\text{ppy})_3]$  (0.8 mg, 1.25  $\mu\text{mol}$ , 0.5 mol%), vinylborate (**2**) (0.25 mmol, 1.0 eq) and MeOH (5.0 mL) under  $\text{N}_2$ . The vinylborate (**2**) was dissolved with ultrasonic bath. The tube was placed at a distance of 2–3 cm from 3W Blue LED lamp ( $h\nu = 425 \pm 15 \text{ nm}$ ). The yellow solution was irradiated with visible light at room temperature (the stirring cause a lowering of *E/Z* selectivity). After 2 h, aqueous saturated  $\text{NaHCO}_3$  solution was added. The resulting mixture was extracted with ether or pentane, dried ( $\text{Na}_2\text{SO}_4$ ), and filtered. The filtrate was concentrated *in vacuo* and the residue was purified by chromatography on silica gel to afford trifluoromethylated alkene.

### (*E*)-1-(3,3,3-Trifluoroprop-1-enyl)-4-methylbenzene (**3b**)

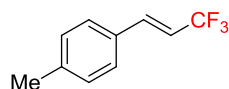

According to general procedure A, Togni's reagent (**1a**) (348 mg, 1.1 mmol),  $[\text{Ru}(\text{bpy})_3](\text{PF}_6)_2$  (40 mg, 46.5  $\mu\text{mol}$ ), (*E*)-vinylborate (**2b**) (224 mg, 1.0 mmol) and MeOH (20 mL) were stirred at room temperature under visible light irradiation (3 W Blue LEDs :  $h\nu = 425 \pm 15 \text{ nm}$ ). After 5 h, aqueous saturated  $\text{NaHCO}_3$  solution was added. The resulting mixture was extracted with pentane, dried ( $\text{Na}_2\text{SO}_4$ ), and filtered. Purification by column chromatography on silica gel (pentane) afford the title compound (151.2 mg, 81% yield) as a white solid containing approximately 1% of (*Z*)-product. The

spectral data of the product were identical with those reported in the literature.

**<sup>1</sup>H NMR** (400 MHz, CDCl<sub>3</sub>, rt):  $\delta$  7.34 (d,  $J$  = 8.0 Hz, 2 H), 7.19 (d,  $J$  = 8.0 Hz, 2 H), 7.10 (dq,  $J$  = 16.4, 2.0 Hz, 1 H), 6.15 (dq,  $J$  = 16.4, 6.4 Hz, 1 H), 2.37 (s, 3 H). **<sup>13</sup>C NMR** (100 MHz, CDCl<sub>3</sub>, rt):  $\delta$  140.4, 137.7 (q,  $J$  = 6.6 Hz), 130.8, 129.7, 127.6, 123.9 (q,  $J$  = 267 Hz), 115.0 (q,  $J$  = 33.6 Hz), 21.4. **<sup>19</sup>F NMR** (376.5 MHz, CDCl<sub>3</sub>, rt):  $\delta$  -63.11 (dd,  $J$  = 6.6, 2.2 Hz, 3 F).

Ref.: T. Liu, Q. Shen, *Org. Lett.* **2011**, *13*, 2342–2345.

#### (*E*)-1-(3,3,3-Trifluoroprop-1-enyl)-4-methoxybenzene (**3c**)

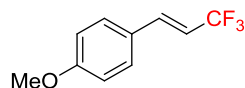

According to general procedure A, Togni's reagent (**1a**) (84 mg, 0.266 mmol), [Ru(bpy)<sub>3</sub>](PF<sub>6</sub>)<sub>2</sub> (10.7 mg, 12.5  $\mu$ mol), (*E*)-vinylborate (**2c**) (56 mg, 0.233 mmol) and MeOH (10 mL) were stirred at room temperature under visible light irradiation (3 W Blue LEDs :  $h\nu$  = 425  $\pm$  15 nm). After 5 h, aqueous saturated NaHCO<sub>3</sub> solution was added. The resulting mixture was extracted with pentane, dried (Na<sub>2</sub>SO<sub>4</sub>), and filtered. Purification by column chromatography on silica gel (pentane/ether = 20/1) afford the title compound (42 mg, 88% yield) as a white solid containing approximately 1% of (*Z*)-product. The spectral data of the product were identical with those reported in the literature.

**<sup>1</sup>H NMR** (400 MHz, CDCl<sub>3</sub>, rt):  $\delta$  7.39 (dd,  $J$  = 7.0, 2.0 Hz, 2 H), 7.07 (dq,  $J$  = 16.0, 2.0 Hz, 1 H), 7.91 (dd,  $J$  = 7.0, 2.0 Hz, 2 H), 6.06 (dq,  $J$  = 16.0, 6.8 Hz, 1 H), 3.83 (s, 3 H). **<sup>13</sup>C NMR** (100 MHz, CDCl<sub>3</sub>, rt):  $\delta$  161.2, 137.3 (q,  $J$  = 6.7 Hz), 129.1, 126.3, 124.1 (q,  $J$  = 262 Hz), 114.5, 113.6 (q,  $J$  = 33.7 Hz), 21.4. **<sup>19</sup>F NMR** (376.5 MHz, CDCl<sub>3</sub>, rt):  $\delta$  -62.85 (d,  $J$  = 6.7 Hz, 3 F).

Ref.: T. Liu, Q. Shen, *Org. Lett.* **2011**, *13*, 2342–2345.

#### (*E*)-1-(3,3,3-Trifluoroprop-1-enyl)-4-chlorobenzene (**3d**)

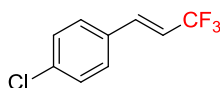

According to general procedure A, Togni's reagent (**1a**) (87 mg, 0.275 mmol), [Ru(bpy)<sub>3</sub>](PF<sub>6</sub>)<sub>2</sub> (10.7 mg, 12.5  $\mu$ mol), (*E*)-vinylborate (**2d**) (87 mg, 0.25 mmol) and MeOH (5.0 mL) were stirred at room temperature under visible light irradiation (3 W Blue LEDs :  $h\nu$  = 425  $\pm$  15 nm). After 5 h, aqueous saturated NaHCO<sub>3</sub> solution was added. The resulting mixture was extracted with pentane, dried (Na<sub>2</sub>SO<sub>4</sub>), and filtered. Purification by column chromatography on silica gel (pentane) afford the title compound (37 mg, 72% yield) as a colorless oil containing approximately 3% of (*Z*)-product. The spectral data of the product were identical with those reported in the literature.

**<sup>1</sup>H NMR** (400 MHz, CDCl<sub>3</sub>, rt):  $\delta$  7.41-7.35 (m, 4 H), 7.10 (dq,  $J$  = 16.4, 2.0 Hz, 1 H), 6.18 (dq,  $J$  = 16.4, 6.4 Hz, 1 H). **<sup>13</sup>C NMR** (100 MHz, CDCl<sub>3</sub>, rt):  $\delta$  136.6 (q,  $J$  = 6.7 Hz), 136.1, 132.1, 129.3, 128.8, 123.5 (q,  $J$  = 267 Hz), 116.7 (q,  $J$  = 33.7 Hz). **<sup>19</sup>F NMR** (376.5 MHz, CDCl<sub>3</sub>, rt):  $\delta$  -63.44 (d,  $J$  = 7.3 Hz, 3 F).

Ref.: T. Hanamoto, N. Morita, K. Shindo, *Eur. J. Org. Chem.* **2003**, *21*, 4279–4285.

**(E)-1-(3,3,3-Trifluoroprop-1-enyl)-4-bromobenzene (3e)**

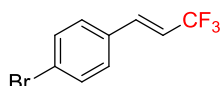

According to general procedure A, Togni's reagent (**1a**) (90 mg, 0.284 mmol), [Ru(bpy)<sub>3</sub>](PF<sub>6</sub>)<sub>2</sub> (10.7 mg, 12.5 μmol), (*E*)-vinylborate (**2e**) (72 mg, 0.25 mmol) and MeOH (5.0 mL) were stirred at room temperature under visible light irradiation (3W Blue LEDs :  $h\nu = 425 \pm 15$  nm). After 5 h, aqueous saturated NaHCO<sub>3</sub> solution was added. The resulting mixture was extracted with pentane, dried (Na<sub>2</sub>SO<sub>4</sub>), and filtered. Purification by column chromatography on silica gel (pentane) afford the title compound (47 mg, 81% yield) as a colorless oil containing approximately 4% of (*Z*)-product. The spectral data of the product were identical with those reported in the literature.

<sup>1</sup>H NMR (400 MHz, CDCl<sub>3</sub>, rt):  $\delta$  7.53 (d,  $J = 8.4$  Hz, 2 H), 7.31 (d,  $J = 8.4$  Hz, 2 H), 7.09 (dq,  $J = 16.4, 2.0$  Hz, 1 H), 6.20 (dq,  $J = 16.4, 6.8$  Hz, 1 H). <sup>13</sup>C NMR (100 MHz, CDCl<sub>3</sub>, rt):  $\delta$  136.6 (q,  $J = 6.6$  Hz), 132.5, 132.3, 129.1, 124.4, 123.5 (q,  $J = 267$  Hz), 116.9 (q,  $J = 33.8$  Hz). <sup>19</sup>F NMR (376.5 MHz, CDCl<sub>3</sub>, rt):  $\delta$  -63.49 (d,  $J = 6.9$  Hz, 3 F).

Ref.: A. T. Parsons, T. D. Senecal, S. L. Buchwald, *Angew. Chem. Int. Ed.* **2012**, *51*, 2947–2950.

**(E)-1-(3,3,3-Trifluoroprop-1-enyl)-4-trifluoromethylbenzene (3f)**

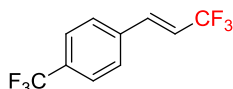

According to general procedure B, Togni's reagent (**1a**) (87 mg, 0.275 mmol), [fac-Ir(ppy)<sub>3</sub>] (0.8 mg, 1.25 μmol), (*E*)-vinylborate (**2f**) (70 mg, 0.25 mmol) and MeOH (5.0 mL) were irradiated with visible light (3 W Blue LEDs :  $h\nu = 425 \pm 15$  nm) at room temperature. After 2 h, aqueous saturated NaHCO<sub>3</sub> solution was added. The resulting mixture was extracted with pentane, dried (Na<sub>2</sub>SO<sub>4</sub>), and filtered. Purification by column chromatography on silica gel (pentane) afford the title compound (47 mg, 79% yield) as a colorless oil containing approximately 4% of (*Z*)-product. The spectral data of the product were identical with those reported in the literature.

<sup>1</sup>H NMR (400 MHz, CDCl<sub>3</sub>, rt):  $\delta$  7.66 (d,  $J = 8.4$  Hz, 2 H), 7.56 (d,  $J = 8.4$  Hz, 2 H), 7.19 (dq,  $J = 16.0, 2.0$  Hz, 1 H), 6.30 (dq,  $J = 16.0, 6.4$  Hz, 1 H). <sup>13</sup>C NMR (100 MHz, CDCl<sub>3</sub>, rt):  $\delta$  137.0, 136.4 (q,  $J = 6.5$  Hz), 131.2 (q,  $J = 32.7$  Hz), 127.9, 126.1, 123.9 (q,  $J = 271$  Hz), 123.3 (q,  $J = 268$  Hz), 118.7 (q,  $J = 34.0$  Hz). <sup>19</sup>F NMR (376.5 MHz, CDCl<sub>3</sub>, rt):  $\delta$  -62.92 (s, 3 F), -63.80 (d,  $J = 5.1$  Hz, 3 F).

Ref.: T. Hanamoto, N. Morita, K. Shindo, *Eur. J. Org. Chem.* **2003**, *21*, 4279–4285.

**(E)-1-(3,3,3-Trifluoroprop-1-enyl)-4-trifluoromethoxybenzene (3g)**

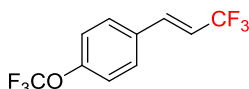

According to general procedure A, Togni's reagent (**1a**) (90 mg, 0.284 mmol), [Ru(bpy)<sub>3</sub>](PF<sub>6</sub>)<sub>2</sub> (10.7 mg, 12.5 μmol), (*E*)-vinylborate (**2g**) (70 mg, 0.238 mmol) and MeOH (5.0 mL) were stirred at room

temperature under visible light irradiation (3W Blue LEDs :  $h\nu = 425 \pm 15$  nm). After 5 h, aqueous saturated  $\text{NaHCO}_3$  solution was added. The resulting mixture was extracted with pentane, dried ( $\text{Na}_2\text{SO}_4$ ), and filtered. Purification by column chromatography on silica gel (pentane/ether = 10/1) afford the title compound (42 mg, 69% yield) as a colorless oil containing approximately 6% of (*Z*)-product.

**$^1\text{H}$  NMR** (400 MHz,  $\text{CDCl}_3$ , rt):  $\delta$  7.49 (d,  $J = 8.8$  Hz, 2 H), 7.24 (d,  $J = 8.8$  Hz, 2 H), 7.13 (dq,  $J = 16.0, 2.0$  Hz, 1 H), 6.19 (dq,  $J = 16.0, 6.4$  Hz, 1 H).  **$^{13}\text{C}$  NMR** (100 MHz,  $\text{CDCl}_3$ , rt):  $\delta$  150.4, 136.3 (q,  $J = 6.8$  Hz), 132.2, 129.1, 123.4 (q,  $J = 267$  Hz), 121.4, 120.6 (q,  $J = 262$  Hz), 117.0 (q,  $J = 34.0$  Hz).  **$^{19}\text{F}$  NMR** (376.5 MHz,  $\text{CDCl}_3$ , rt):  $\delta$  -57.84 (s, 3 F), -63.56 (d,  $J = 6.6$  Hz, 3 F). **HRMS** (ESI-TOF): calculated for  $[\text{C}_{10}\text{H}_6\text{F}_6\text{O}+\text{Na}]^+$  requires 279.0215, found 279.0210.

#### (*E*)-4-(3,3,3-Trifluoroprop-1-enyl)benzenecarbonitrile (**3h**)

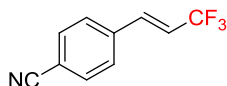

According to general procedure A, Togni's reagent (**1a**) (90 mg, 0.284 mmol),  $[\text{Ru}(\text{bpy})_3](\text{PF}_6)_2$  (8.9 mg, 10.3  $\mu\text{mol}$ ), (*E*)-vinylborate (**2h**) (52 mg, 0.221 mmol) and MeOH (10 mL) were stirred at room temperature under visible light irradiation (3W Blue LEDs :  $h\nu = 425 \pm 15$  nm). After 5 h, aqueous saturated  $\text{NaHCO}_3$  solution was added. The resulting mixture was extracted with pentane, dried ( $\text{Na}_2\text{SO}_4$ ), and filtered. Purification by column chromatography on silica gel (pentane/ether = 20/1) afford the title compound (34 mg, 78% yield) as a white solid containing approximately 3% of (*Z*)-product. The spectral data of the product were identical with those reported in the literature.

**$^1\text{H}$  NMR** (400 MHz,  $\text{CDCl}_3$ , rt):  $\delta$  7.69 (d,  $J = 8.4$  Hz, 2 H), 7.55 (d,  $J = 8.4$  Hz, 2 H), 7.17 (dq,  $J = 16.0, 2.4$  Hz, 1 H), 6.31 (dq,  $J = 16.4, 6.4$  Hz, 1 H).  **$^{13}\text{C}$  NMR** (100 MHz,  $\text{CDCl}_3$ , rt):  $\delta$  137.8, 136.0 (q,  $J = 6.7$  Hz), 132.8, 128.1, 123.1 (q,  $J = 268$  Hz), 119.6 (q,  $J = 34.2$  Hz), 118.3, 113.6.  **$^{19}\text{F}$  NMR** (376.5 MHz,  $\text{CDCl}_3$ , rt):  $\delta$  -63.90 (d,  $J = 4.5$  Hz, 3 F).

Ref.: T. Kobayashi, T. Eba, O. Tamura, H. Ishibashi, *J. Org. Chem.* **2002**, 67, 3156–3159.

#### (*E*)-1-(3,3,3-Trifluoroprop-1-enyl)-3,5-difluorobenzene (**3i**)

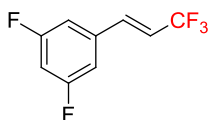

According to general procedure A, Togni's reagent (**1a**) (87 mg, 0.275 mmol),  $[\text{Ru}(\text{bpy})_3](\text{PF}_6)_2$  (10.7 mg, 12.5  $\mu\text{mol}$ ), (*E*)-vinylborate (**2i**) (61 mg, 0.25 mmol) and MeOH (5.0 mL) were stirred at room temperature under visible light irradiation (3W Blue LEDs :  $h\nu = 425 \pm 15$  nm). After 5 h, aqueous saturated  $\text{NaHCO}_3$  solution was added. The resulting mixture was extracted with pentane, dried ( $\text{Na}_2\text{SO}_4$ ), and filtered. Purification by column chromatography on silica gel (pentane) afford the title compound (35 mg, 68% yield) as a colorless oil containing approximately 5% of (*Z*)-product.

**$^1\text{H}$  NMR** (400 MHz,  $\text{CDCl}_3$ , rt):  $\delta$  7.07 (dq,  $J = 16.0, 2.0$  Hz, 1 H), 7.01-6.94 (m, 2 H), 6.88-6.81 (m, 1

H), 6.22 (dq,  $J = 16.0, 6.4$  Hz, 1 H).  $^{13}\text{C}$  NMR (100 MHz,  $\text{CDCl}_3$ , rt):  $\delta$  163.4 (d,  $J = 248$  Hz), 136.9 (q,  $J = 9.4$  Hz), 135.8, 123.1 (q,  $J = 267$  Hz), 118.9 (q,  $J = 34.3$  Hz), 110.5 (d,  $J = 26.0$  Hz), 105.4 (t,  $J = 25.3$  Hz).  $^{19}\text{F}$  NMR (376.5 MHz,  $\text{CDCl}_3$ , rt):  $\delta$  -63.84 (d,  $J = 7.5$  Hz, 3 F), -108.75 (m, 2 F). HRMS (ESI-TOF): calculated for  $[\text{C}_9\text{H}_5\text{F}_5+\text{Na}]^+$  requires 231.0204, found 231.0208.

**(E)-1-(3,3,3-Trifluoroprop-1-enyl)-3,5-ditrifluoromethylbenzene (3j)**

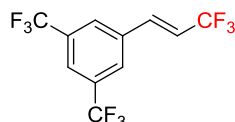

According to general procedure B, Togni's reagent (**1a**) (94 mg, 0.30 mmol), [*fac*-Ir(ppy)<sub>3</sub>] (0.8 mg, 1.25  $\mu\text{mol}$ ), (*E*)-vinylborate (**2j**) (86.5 mg, 0.25 mmol) and MeOH (5.0 mL) were irradiated with visible light (3 W Blue LEDs :  $h\nu = 425 \pm 15$  nm) at room temperature. After 2 h, aqueous saturated  $\text{NaHCO}_3$  solution was added. The resulting mixture was extracted with pentane, dried ( $\text{Na}_2\text{SO}_4$ ), and filtered. Purification by column chromatography on silica gel (pentane) afford the title compound (63 mg, 81% yield) as a colorless oil containing approximately 2% of (*Z*)-product.

$^1\text{H}$  NMR (400 MHz,  $\text{CDCl}_3$ , rt):  $\delta$  7.89 (br s, 3 H), 7.24 (dq,  $J = 16.4, 2.0$  Hz, 1 H), 6.39 (dq,  $J = 16.4, 6.0$  Hz, 1 H).  $^{13}\text{C}$  NMR (100 MHz,  $\text{CDCl}_3$ , rt):  $\delta$  135.7, 135.3 (q,  $J = 6.6$  Hz), 132.8 ( $J = 33.6$  Hz), 127.5, 123.5, 123.1 (q,  $J = 271$  Hz), 122.9 (q,  $J = 268$  Hz), 120.2 (q,  $J = 34.5$  Hz).  $^{19}\text{F}$  NMR (376.5 MHz,  $\text{CDCl}_3$ , rt):  $\delta$  -63.13 (s, 3 F), -63.14 (s, 3 F), -64.06 (d,  $J = 6.4$  Hz, 3 F). HRMS (ESI-TOF): calculated for  $[\text{C}_{11}\text{H}_5\text{F}_9+\text{Na}]^+$  requires 331.0140, found 331.0145.

**(E)-1-(3,3,3-Trifluoroprop-1-enyl)-3-*tert*-butoxycarbonylaminobenzene (3k)**

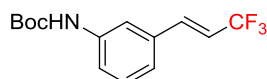

According to general procedure A, Togni's reagent (**1a**) (90 mg, 0.284 mmol),  $[\text{Ru}(\text{bpy})_3](\text{PF}_6)_2$  (9.0 mg, 10.5  $\mu\text{mol}$ ), (*E*)-vinylborate (**2k**) (78 mg, 0.240 mmol) and MeOH (5.0 mL) were stirred at room temperature under visible light irradiation (3W Blue LEDs :  $h\nu = 425 \pm 15$  nm). After 5 h, aqueous saturated  $\text{NaHCO}_3$  solution was added. The resulting mixture was extracted with ether, dried ( $\text{Na}_2\text{SO}_4$ ), and filtered. Purification by column chromatography on silica gel (pentane/ether = 10/1) afford the title compound (64 mg, 93% yield) as a white solid containing approximately 5% of (*Z*)-product.

$^1\text{H}$  NMR (400 MHz,  $\text{CDCl}_3$ , rt):  $\delta$  7.64 (s, 1 H), 7.32-7.22 (m, 2 H), 7.13-7.09 (m, 2 H), 6.56 (br s, 1 H), 6.21 (dq,  $J = 16.0, 6.4$  Hz, 1 H), 1.53 (s, 9 H).  $^{13}\text{C}$  NMR (100 MHz,  $\text{CDCl}_3$ , rt):  $\delta$  152.8, 139.2, 137.6 (q,  $J = 6.6$  Hz), 134.5, 129.6, 124.0 (q,  $J = 267$  Hz), 122.4, 120.1, 117.3, 116.5 (q,  $J = 33.8$  Hz), 81.0, 28.4.  $^{19}\text{F}$  NMR (376.5 MHz,  $\text{CDCl}_3$ , rt):  $\delta$  -63.37 (d,  $J = 3.8$  Hz, 3 F). HRMS (ESI-TOF): calculated for  $[\text{C}_{14}\text{H}_{16}\text{F}_3\text{NO}_2+\text{Na}]^+$  requires 310.1025, found 310.1025.

**(E)-1-(3,3,3-Trifluoroprop-1-enyl)-2-methylbenzene (3l)**

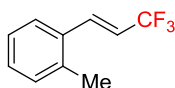

According to general procedure A, Togni's reagent (**1a**) (90 mg, 0.284 mmol), [Ru(bpy)<sub>3</sub>](PF<sub>6</sub>)<sub>2</sub> (10.7 mg, 12.5 μmol), (*E*)-vinylborate (**2k**) (56 mg, 0.25 mmol) and MeOH (5.0 mL) were stirred at room temperature under visible light irradiation (3W Blue LEDs :  $h\nu = 425 \pm 15$  nm). After 5 h, aqueous saturated NaHCO<sub>3</sub> solution was added. The resulting mixture was extracted with pentane, dried (Na<sub>2</sub>SO<sub>4</sub>), and filtered. Purification by column chromatography on silica gel (pentane) afford the title compound (33 mg, 70% yield) as a colorless oil containing approximately 3% of (*Z*)-product.

**<sup>1</sup>H NMR** (400 MHz, CDCl<sub>3</sub>, rt):  $\delta$  7.48-7.40 (m, 2 H), 7.31-7.20 (m, 3 H), 6.12 (dq,  $J = 19.6, 6.4$  Hz, 1 H). **<sup>13</sup>C NMR** (100 MHz, CDCl<sub>3</sub>, rt):  $\delta$  137.0, 135.7 (q,  $J = 6.7$  Hz), 132.8, 130.0, 129.9, 126.5, 126.3, 123.7 (q,  $J = 267$  Hz), 117.3 (q,  $J = 33.4$  Hz), 19.7. **<sup>19</sup>F NMR** (376.5 MHz, CDCl<sub>3</sub>, rt):  $\delta$  -63.32 (dd,  $J = 6.7, 2.2$  Hz, 3 F).

Ref.: G. K. S. Prakash, H. S. Krishnan, P. V. Jog, A. P. Lyer, G. A. Olah, *Org. Lett.* **2012**, *14*, 1146–1149.

**(E)-1-(3,3,3-Trifluoroprop-1-enyl)-3-thiophene (3m)**

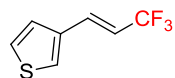

According to general procedure A, Togni's reagent (**1a**) (79 mg, 0.25 mmol), [Ru(bpy)<sub>3</sub>](PF<sub>6</sub>)<sub>2</sub> (8.9 mg, 10.3 μmol), (*E*)-vinylborate (**2m**) (60 mg, 0.275 mmol) and MeOH (10 mL) were stirred at room temperature under visible light irradiation (3W Blue LEDs :  $h\nu = 425 \pm 15$  nm). After 5 h, aqueous saturated NaHCO<sub>3</sub> solution was added. The resulting mixture was extracted with pentane, dried (Na<sub>2</sub>SO<sub>4</sub>), and filtered. Purification by column chromatography on silica gel (pentane/ether = 20/1) afford the title compound (28 mg, 63% yield) as a pale yellow solid containing approximately 2% of (*Z*)-product and 2% of protodeboronated by-product. The spectral data of the product were identical with those reported in the literature.

**<sup>1</sup>H NMR** (400 MHz, CDCl<sub>3</sub>, rt):  $\delta$  7.42 (d,  $J = 2.4$  Hz, 1 H), 7.35 (dd,  $J = 5.2, 0.4$  Hz, 1 H), 7.24 (dd,  $J = 5.2, 1.2$  Hz, 1H), 7.14 (dq,  $J = 16.0, 2.0$  Hz, 1 H), 6.05 (dq,  $J = 16.0, 6.4$  Hz, 1 H). **<sup>13</sup>C NMR** (100 MHz, CDCl<sub>3</sub>, rt):  $\delta$  136.4, 131.6 (q,  $J = 6.8$  Hz), 127.2, 127.0, 126.5 (q,  $J = 267$  Hz), 125.0, 115.5 (q,  $J = 34.1$  Hz). **<sup>19</sup>F NMR** (376.5 MHz, CDCl<sub>3</sub>, rt):  $\delta$  -63.29 (dd,  $J = 6.7, 2.2$  Hz, 3 F).

Ref.: A. T. Parsons, T. D. Senecal, S. L. Buchwald, *Angew. Chem. Int. Ed.* **2012**, *51*, 2947–2950.

**(E)-3-(3,3,3-Trifluoroprop-1-enyl)pyridine (3n)**

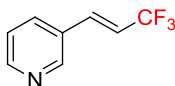

According to general procedure A, Togni's reagent (**1a**) (90 mg, 0.284 mmol), [Ru(bpy)<sub>3</sub>](PF<sub>6</sub>)<sub>2</sub> (9.5



mg, 11.0  $\mu$ mol), (*E*)-vinylborate (**2n**) (52 mg, 0.246 mmol) and MeOH (5.0 mL) were stirred at room temperature under visible light irradiation (3W Blue LEDs :  $h\nu = 425 \pm 15$  nm). After 5 h, aqueous saturated NaHCO<sub>3</sub> solution was added. The resulting mixture was extracted with pentane, dried (Na<sub>2</sub>SO<sub>4</sub>), and filtered. Purification by column chromatography on silica gel (pentane/ether = 10/1→0/1) afford the title compound (29 mg, 68% yield) as a pale yellow oil approximately 2% of (*Z*)-product. The spectral data of the product were identical with those reported in the literature.

<sup>1</sup>H NMR (400 MHz, CDCl<sub>3</sub>, rt):  $\delta$  8.69 (d,  $J = 2.0$  Hz, 1 H), 8.62 (dd,  $J = 4.8, 2.0$  Hz, 1 H), 7.78 (dt,  $J = 8.0, 2.0$  Hz, 1 H), 7.34 (dd,  $J = 8.0, 4.8$  Hz, 1 H), 7.16 (dq,  $J = 16.4, 2.0$  Hz, 1 H), 6.29 (dq,  $J = 16.4, 6.4$  Hz, 1 H). <sup>13</sup>C NMR (100 MHz, CDCl<sub>3</sub>, rt):  $\delta$  151.1, 149.3, 134.6 (q,  $J = 6.8$  Hz), 129.3, 123.8, 123.2 (q,  $J = 267$  Hz), 118.4 (q,  $J = 34.3$  Hz). <sup>19</sup>F NMR (376.5 MHz, CDCl<sub>3</sub>, rt):  $\delta$  -63.82 (d,  $J = 7.2$  Hz, 3 F).

Ref.: T. Kobayashi, T. Eba, O. Tamura, H. Ishibashi, *J. Org. Chem.* **2002**, 67, 3156–3159.

#### (*E*)-4-(3,3,3-Trifluoroprop-1-enyl)-2-chloropyridine (**3o**)

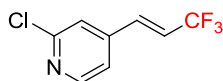

According to general procedure A, Togni's reagent (**1a**) (87 mg, 0.275 mmol), [Ru(bpy)<sub>3</sub>](PF<sub>6</sub>)<sub>2</sub> (10.7 mg, 12.5  $\mu$ mol), (*E*)-vinylborate (**2o**) (61 mg, 0.25 mmol) and MeOH (8.0 mL) were stirred at room temperature under visible light irradiation (3W Blue LEDs :  $h\nu = 425 \pm 15$  nm). After 5 h, aqueous saturated NaHCO<sub>3</sub> solution was added. The resulting mixture was extracted with pentane, dried (Na<sub>2</sub>SO<sub>4</sub>), and filtered. Purification by column chromatography on silica gel (pentane/ether = 9/1→3/2) afford the title compound (29 mg, 56% yield) as a colorless crystal.

<sup>1</sup>H NMR (400 MHz, CDCl<sub>3</sub>, rt):  $\delta$  8.44 (d,  $J = 4.8$  Hz, 1 H), 7.37 (s, 1 H), 7.25 (dd,  $J = 4.8, 1.6$  Hz, 1 H), 7.07 (dq,  $J = 16.0, 2.0$  Hz, 1 H), 6.41 (dq,  $J = 16.0, 6.4$  Hz, 1 H). <sup>13</sup>C NMR (100 MHz, CDCl<sub>3</sub>, rt):  $\delta$  152.8, 150.5, 143.9, 134.3 (q,  $J = 6.5$  Hz), 122.6 (q,  $J = 268$  Hz), 122.4, 121.9 (q,  $J = 34.6$  Hz), 120.3. <sup>19</sup>F NMR (376.5 MHz, CDCl<sub>3</sub>, rt):  $\delta$  -64.36 (d,  $J = 5.6$  Hz, 3 F). HRMS (ESI-TOF): calculated for [C<sub>8</sub>H<sub>5</sub>F<sub>3</sub>NCl+Na]<sup>+</sup> requires 229.9955, found 229.9956.

#### (*E*)-3-(3,3,3-Trifluoroprop-1-enyl)-2-cyanopyridine (**3p**)

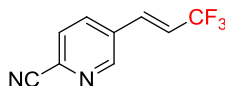

According to general procedure A, Togni's reagent (**1a**) (90 mg, 0.284 mmol), [Ru(bpy)<sub>3</sub>](PF<sub>6</sub>)<sub>2</sub> (8.6 mg, 10.0  $\mu$ mol), (*E*)-vinylborate (**2p**) (58 mg, 0.246 mmol) and MeOH (5.0 mL) were stirred at room temperature under visible light irradiation (3W Blue LEDs :  $h\nu = 425 \pm 15$  nm). After 5 h, aqueous saturated NaHCO<sub>3</sub> solution was added. The resulting mixture was extracted with pentane, dried (Na<sub>2</sub>SO<sub>4</sub>), and filtered. Purification by column chromatography on silica gel (pentane/ether = 10/1→0/1) afford the title compound (32 mg, 66% yield) as a pale yellow solid containing approximately 1% of (*Z*)-product.



**<sup>1</sup>H NMR** (400 MHz, CDCl<sub>3</sub>, rt): δ 8.79 (d, *J* = 2.0 Hz, 1 H), 7.91 (dd, *J* = 8.0, 2.4 Hz, 1 H), 7.74 (d, *J* = 8.0 Hz, 1 H), 7.19 (dq, *J* = 16.4, 2.0 Hz, 1 H), 6.41 (dq, *J* = 16.4, 6.0 Hz, 1 H). **<sup>13</sup>C NMR** (100 MHz, CDCl<sub>3</sub>, rt): δ 150.2, 135.0, 134.6, 132.9 (q, *J* = 6.7 Hz), 132.4, 128.5, 122.6 (q, *J* = 268 Hz), 121.6 (q, *J* = 34.7 Hz), 116.8. **<sup>19</sup>F NMR** (376.5 MHz, CDCl<sub>3</sub>, rt): δ -64.26 (d, *J* = 7.1 Hz, 3 F). **HRMS** (ESI-TOF): calculated for [C<sub>9</sub>H<sub>5</sub>F<sub>3</sub>N<sub>2</sub>+Na]<sup>+</sup> requires 221.0297, found 221.0301.

**(*E*)-3-(3,3,3-Trifluoroprop-1-enyl)-3-pyridinecarboxylic acid methyl ester (3q)**

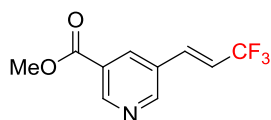

According to general procedure A, Togni's reagent (**1a**) (90 mg, 0.284 mmol), [Ru(bpy)<sub>3</sub>](PF<sub>6</sub>)<sub>2</sub> (9.2 mg, 10.6 μmol), (*E*)-vinylborate (**2q**) (63 mg, 0.234 mmol) and MeOH (10 mL) were stirred at room temperature under visible light irradiation (3W Blue LEDs : *hν* = 425 ± 15 nm). After 5 h, aqueous saturated NaHCO<sub>3</sub> solution was added. The resulting mixture was extracted with ether, dried (Na<sub>2</sub>SO<sub>4</sub>), and filtered. Purification by column chromatography on silica gel (pentane/ether = 10/1→0/1) afford the title compound (38 mg, 70% yield) as a colorless solid containing approximately 1% of (*Z*)-product.

**<sup>1</sup>H NMR** (400 MHz, CDCl<sub>3</sub>, rt): δ 9.20 (d, *J* = 2.0 Hz, 1 H), 8.83 (d, *J* = 2.0 Hz, 1 H), 8.39 (dd, *J* = 2.0, 2.0 Hz, 1 H), 7.20 (dq, *J* = 16.0, 2.0 Hz, 1 H), 6.41 (dq, *J* = 16.0, 6.4 Hz, 1 H), 3.98 (s, 3 H). **<sup>13</sup>C NMR** (100 MHz, CDCl<sub>3</sub>, rt): δ 165.2, 152.6, 151.8, 134.9, 133.5 (q, *J* = 6.7 Hz), 129.3, 126.4, 123.0 (q, *J* = 268 Hz), 119.7 (q, *J* = 34.4 Hz), 52.7. **<sup>19</sup>F NMR** (376.5 MHz, CDCl<sub>3</sub>, rt): δ -64.01 (d, *J* = 4.1 Hz, 3 F). **HRMS** (ESI-TOF): calculated for [C<sub>10</sub>H<sub>8</sub>F<sub>3</sub>NO<sub>2</sub>+Na]<sup>+</sup> requires 254.0399, found 254.0399.

**(*E*)-6-(3,3,3-Trifluoroprop-1-enyl)-2-methylquinoline (3r)**

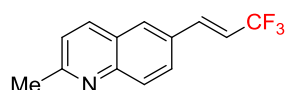

According to general procedure A, Togni's reagent (**1a**) (95 mg, 0.30 mmol), [Ru(bpy)<sub>3</sub>](PF<sub>6</sub>)<sub>2</sub> (10.7 mg, 12.5 μmol), (*E*)-vinylborate (**2r**) (66 mg, 0.24 mmol) and MeOH (5.0 mL) were stirred at room temperature under visible light irradiation (3W Blue LEDs : *hν* = 425 ± 15 nm). After 5 h, aqueous saturated NaHCO<sub>3</sub> solution was added. The resulting mixture was extracted with ether, dried (Na<sub>2</sub>SO<sub>4</sub>), and filtered. Purification by column chromatography on silica gel (pentane/ether = 10/1) afford the title compound (39 mg, 69% yield) as a colorless solid containing approximately 2% of (*Z*)-product.

**<sup>1</sup>H NMR** (400 MHz, CDCl<sub>3</sub>, rt): δ 8.07-8.01 (m, 2 H), 7.82-7.79 (m, 2 H), 7.35-7.27 (m, 2 H), 6.32 (dq, *J* = 16.4, 6.4 Hz, 1 H). **<sup>13</sup>C NMR** (100 MHz, CDCl<sub>3</sub>, rt): δ 160.4, 148.7, 137.2 (q, *J* = 6.7 Hz), 136.4, 130.9, 129.7, 128.3, 127.0, 126.5, 123.7 (q, *J* = 267 Hz), 122.9, 116.8 (q, *J* = 33.9 Hz), 25.5. **<sup>19</sup>F NMR** (376.5 MHz, CDCl<sub>3</sub>, rt): δ -63.28 (d, *J* = 6.7 Hz, 3 F). **HRMS** (ESI-TOF): calculated for [C<sub>13</sub>H<sub>10</sub>F<sub>3</sub>N+H]<sup>+</sup> requires 238.0838, found 238.0839.

### (*E*)-3-(3,3,3-Trifluoroprop-1-enyl)-quinoline (3s)

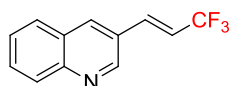

According to general procedure A, Togni's reagent (**1a**) (87 mg, 0.275 mmol), [Ru(bpy)<sub>3</sub>](PF<sub>6</sub>)<sub>2</sub> (10.7 mg, 12.5 μmol), (*E*)-vinylborate (**2s**) (63 mg, 0.241 mmol) and MeOH (5.0 mL) were stirred at room temperature under visible light irradiation (3W Blue LEDs :  $h\nu = 425 \pm 15$  nm). After 5 h, aqueous saturated NaHCO<sub>3</sub> solution was added. The resulting mixture was extracted with pentane, dried (Na<sub>2</sub>SO<sub>4</sub>), and filtered. Purification by column chromatography on silica gel (pentane/ether = 10/1 → 3/2) afford the title compound (38 mg, 71% yield) as a pale yellow crystal.

**<sup>1</sup>H NMR** (400 MHz, CDCl<sub>3</sub>, rt):  $\delta$  9.03 (s, 1 H), 8.20 (d,  $J = 2.0$  Hz, 1 H), 8.12 (d,  $J = 8.0$  Hz, 1 H), 7.85 (d,  $J = 8.0$  Hz, 1 H), 7.77 (dt,  $J = 7.2, 1.6$  Hz, 1 H), 7.60 (dt,  $J = 7.2, 1.6$  Hz, 1 H), 7.33 (dq,  $J = 16.0, 2.0$  Hz, 1 H), 6.45 (dq,  $J = 16.0, 6.4$  Hz, 1 H). **<sup>13</sup>C NMR** (100 MHz, CDCl<sub>3</sub>, rt):  $\delta$  148.9, 148.7, 135.0, 134.8 (q,  $J = 6.6$  Hz), 130.7, 129.6, 128.3, 127.6, 127.3, 126.5, 123.3 (q,  $J = 267$  Hz), 118.0 (q,  $J = 34.1$  Hz). **<sup>19</sup>F NMR** (376.5 MHz, CDCl<sub>3</sub>, rt):  $\delta$  -63.63 (dd,  $J = 5.2, 2.2$  Hz, 3 F).

**HRMS** (ESI-TOF): calculated for [C<sub>12</sub>H<sub>8</sub>F<sub>3</sub>N+H]<sup>+</sup> requires 224.0682, found 224.0682.

### (*E*)-5-(3,3,3-Trifluoroprop-1-enyl)-2-methyl-1,3-benzothiazole (3t)

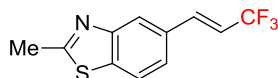

According to general procedure A, Togni's reagent (**1a**) (87 mg, 0.275 mmol), [Ru(bpy)<sub>3</sub>](PF<sub>6</sub>)<sub>2</sub> (9.5 mg, 10.4 μmol), (*E*)-vinylborate (**2t**) (70 mg, 0.25 mmol) and MeOH (5.0 mL) were stirred at room temperature under visible light irradiation (3W Blue LEDs :  $h\nu = 425 \pm 15$  nm). After 5 h, aqueous saturated NaHCO<sub>3</sub> solution was added. The resulting mixture was extracted with ether, dried (Na<sub>2</sub>SO<sub>4</sub>), and filtered. Purification by column chromatography on silica gel (pentane/ether = 10/1) afford the title compound (50 mg, 82% yield) as a white solid containing ca. 3% of (*Z*)-product.

**<sup>1</sup>H NMR** (400 MHz, CDCl<sub>3</sub>, rt):  $\delta$  7.99 (s, 1 H), 7.83 (dd,  $J = 8.0, 4.4$  Hz, 1 H), 7.45 (d,  $J = 8.4$  Hz, 1 H), 7.26 (d,  $J = 16.0$  Hz, 1 H), 6.28 (dq,  $J = 16.0, 6.4$  Hz, 1 H), 2.85 (s, 3 H). **<sup>13</sup>C NMR** (100 MHz, CDCl<sub>3</sub>, rt):  $\delta$  168.5, 154.0, 137.5 (q,  $J = 6.7$  Hz), 131.2, 123.7 (q,  $J = 267$  Hz), 123.5, 121.8, 116.2 (q,  $J = 32.9$  Hz), 20.2. **<sup>19</sup>F NMR** (376.5 MHz, CDCl<sub>3</sub>, rt):  $\delta$  -63.21 (d,  $J = 6.4$  Hz, 3 F). **HRMS** (ESI-TOF): calculated for [C<sub>11</sub>H<sub>8</sub>F<sub>3</sub>NS+H]<sup>+</sup> requires 244.0402, found 244.0402.

### (4,4,4-Trifluorobut-2-enyl)benzene (3u)

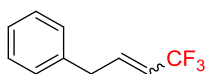

According to general procedure A, Togni's reagent (**1a**) (87 mg, 0.275 mmol), [Ru(bpy)<sub>3</sub>](PF<sub>6</sub>)<sub>2</sub> (10.7 mg, 12.5 μmol), (*E*)-vinylborate (**2u**) (56 mg, 0.25 mmol) and MeOH (5.0 mL) were stirred at room temperature under visible light irradiation (3W Blue LEDs :  $h\nu = 425 \pm 15$  nm). After 5 h, aqueous

saturated NaHCO<sub>3</sub> solution was added. The resulting mixture was extracted with pentane, dried (Na<sub>2</sub>SO<sub>4</sub>), and filtered. Purification by column chromatography on silica gel (pentane) afford the title compound (28 mg, 60% yield, *E/Z* = 65/35) as a colorless oil. The spectral data of the product were identical with those reported in the literature.

<sup>1</sup>H NMR (400 MHz, CDCl<sub>3</sub>, rt) of (*E*)-product: δ 7.36-7.18 (m, 5 H), 6.58-6.52 (m, 1 H), 5.68-5.57 (m, 1 H), 3.50-3.47 (m, 2 H). <sup>1</sup>H NMR (400 MHz, CDCl<sub>3</sub>, rt) of (*Z*)-product: δ 7.36-7.18 (m, 5 H), 6.17-6.10 (m, 1 H), 5.75-5.62 (m, 1 H), 3.64 (d, *J* = 8.0 Hz, 2 H). <sup>13</sup>C NMR (100 MHz, CDCl<sub>3</sub>, rt): δ 141.2 (q, *J* = 5.2 Hz, (*Z*)-product), 139.5 (q, *J* = 6.4 Hz, (*E*)-product), 138.3, 137.4, 128.9, 128.8, 128.6, 127.0, 126.8, 123.1 (q, *J* = 267 Hz), 119.7 (q, *J* = 33.3 Hz, (*E*)-product), 118.9 (q, *J* = 33.3 Hz, (*Z*)-product), 37.8, 34.7, 31.7, 29.8, 22.8, 14.2. <sup>19</sup>F NMR (376.5 MHz, CDCl<sub>3</sub>, rt): δ -57.66 (dd, *J* = 7.9, 3.0 Hz, 3 F, (*Z*)-product), -63.97 (dd, *J* = 6.0, 2.6 Hz, 3 F, (*E*)-product).

Ref.: T. Chu, F.-L. Qing, *Org. Lett.* **2010**, *12*, 5060–5063.

### Gram-scale synthesis of **3s** (Scheme 2)

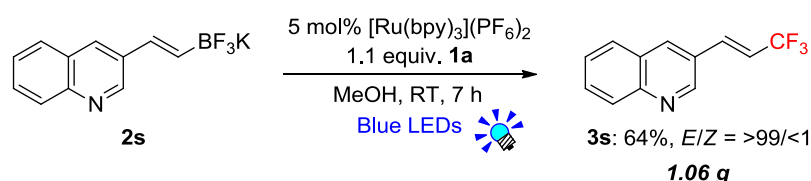

300 mL-Schlenk tube was charged with Togni's reagent (**1a**) (2.6 g, 8.25 mmol), [Ru(bpy)<sub>3</sub>](PF<sub>6</sub>)<sub>2</sub> (320 mg, 0.372 mmol), vinylborate (**2s**) (1.96 g, 7.5 mmol) and MeOH (145 mL) under N<sub>2</sub>. The vinylborate (**2s**) was dissolved with ultrasonic bath. The tube was placed at a distance of 2–3 cm from 3W Blue LED lamp (*hν* = 425 ± 15 nm). The red solution was stirred at room temperature (water bath) under visible light irradiation. After 7 h, aqueous saturated NaHCO<sub>3</sub> solution was added. The resulting mixture was extracted with pentane, dried (Na<sub>2</sub>SO<sub>4</sub>), and filtered. The filtrate was concentrated *in vacuo* and the residue was purified by chromatography on silica gel (pentane/ether = 10/1 → 3/2) to afford the title compound (1.06 g, 64% yield) as a pale yellow solid.

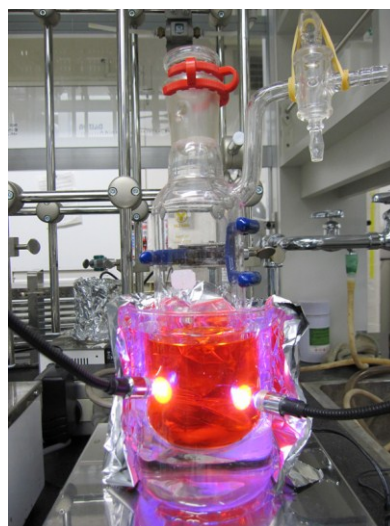

### Crystallographic data for (*E*)-3-(3,3,3-Trifluoroprop-1-enyl)-3-pyridinecarboxylic acid methyl ester (3q)

Diffraction measurements were made on a Bruker SMART APEX II ULTRA/CCD. Intensity measurements were performed using monochromated (doubly curved silicon crystal) Mo-K $\alpha$ -radiation (0.71073 Å) from a sealed microfocus tube. Data were acquired using three sets of Omega scans at different Phi settings. The frame width was 0.5 °. The crystallographic data are summarized in Table S1. The structural analysis was performed on an APEX2 software for preliminary determination of the unit cell. Determination of integrated intensities and unit cell refinement were performed using SAINT. Unless otherwise stated, all non-hydrogen atoms were refined anisotropically by full-matrix least-square techniques based on  $F^2$ . All hydrogen atoms were fixed at the calculated positions.

**Table 1. Crystal data and structure refinement for VitaminB3\_CF3\_alkene.**

|                                        |                                          |                            |
|----------------------------------------|------------------------------------------|----------------------------|
| <b>Identification code</b>             | VitaminB3_CF3_alkene                     |                            |
| <b>Empirical formula</b>               | C10 H8 F3 N O2                           |                            |
| <b>Formula weight</b>                  | 231.17                                   |                            |
| <b>Temperature</b>                     | 93(2) K                                  |                            |
| <b>Wavelength</b>                      | 0.71073 Å                                |                            |
| <b>Crystal system</b>                  | Monoclinic                               |                            |
| <b>Space group</b>                     | P 1 21/c 1                               |                            |
| <b>Unit cell dimensions</b>            | a = 13.040(2) Å                          | $\alpha = 90^\circ$        |
|                                        | b = 12.456(2) Å                          | $\beta = 104.452(2)^\circ$ |
|                                        | c = 19.177(4) Å                          | $\gamma = 90^\circ$        |
| <b>Volume</b>                          | 3016.3(10) Å <sup>3</sup>                |                            |
| <b>Z</b>                               | 12                                       |                            |
| <b>Density (calculated)</b>            | 1.527 g/cm <sup>3</sup>                  |                            |
| <b>Absorption coefficient</b>          | 0.143 mm <sup>-1</sup>                   |                            |
| <b>F(000)</b>                          | 1416                                     |                            |
| <b>Crystal size</b>                    | 0.25 x 0.30 x 0.40 mm <sup>3</sup>       |                            |
| <b>Theta range for data collection</b> | 1.61 to 28.76°                           |                            |
| <b>Index ranges</b>                    | -12 ≤ h ≤ 17, -16 ≤ k ≤ 12, -24 ≤ l ≤ 20 |                            |
| <b>Reflections collected</b>           | 17047                                    |                            |
| <b>Independent reflections</b>         | 7077 [R(int) = 0.0332]                   |                            |
| <b>Completeness to theta = 28.76°</b>  | 90.1%                                    |                            |
| <b>Absorption correction</b>           | Multiscan                                |                            |

|                                         |                                             |
|-----------------------------------------|---------------------------------------------|
| <b>Max. and min. transmission</b>       | 0.9652 and 0.9451                           |
| <b>Refinement method</b>                | Full-matrix least-squares on F <sup>2</sup> |
| <b>Data / restraints / parameters</b>   | 7077 / 0 / 436                              |
| <b>Goodness-of-fit on F<sup>2</sup></b> | 1.084                                       |
| <b>Final R indices [I&gt;2sigma(I)]</b> | R1 = 0.0534, wR2 = 0.1382                   |
| <b>R indices (all data)</b>             | R1 = 0.0982, wR2 = 0.1546                   |
| <b>Largest diff. peak and hole</b>      | 0.668 and -0.296                            |

$$R_{\text{int}} = \Sigma |F_o^2 - F_o^2(\text{mean})| / \Sigma [F_o^2]$$

$$R_1 = \Sigma ||F_o| - |F_c|| / \Sigma |F_o|$$

$$\text{GOOF} = S = \{ \Sigma [w(F_o^2 - F_c^2)^2] / (n - p) \}^{1/2}$$

$$wR_2 = \{ \Sigma [w(F_o^2 - F_c^2)^2] / \Sigma [w(F_o^2)^2] \}^{1/2}$$

$$w = 1 / [\sigma(F_o^2) + (aP)^2 + bP] \text{ where } P \text{ is } [2F_c^2 + \text{Max}(F_o^2, 0)] / 3$$

**Table 2. Atomic coordinates (x10<sup>4</sup>) and equivalent isotropic displacement parameters (Å<sup>2</sup>x10<sup>3</sup>) for VitaminB3\_CF3\_alkene.**

U(eq) is defined as one third of the trace of the orthogonalized U<sup>ij</sup> tensor.

|     | <b>x</b> | <b>y</b> | <b>z</b> | <b>U(eq)</b> |
|-----|----------|----------|----------|--------------|
| N1  | 10591(2) | 9312(1)  | 4390(1)  | 27(1)        |
| C2  | 9343(2)  | 7862(2)  | 4015(1)  | 21(1)        |
| C3  | 10178(2) | 7132(2)  | 4100(1)  | 19(1)        |
| C1  | 9600(2)  | 8942(2)  | 4168(1)  | 24(1)        |
| C4  | 11206(2) | 7504(2)  | 4331(1)  | 21(1)        |
| C5  | 11376(2) | 8597(2)  | 4468(1)  | 25(1)        |
| O2  | 13032(1) | 7195(1)  | 4713(1)  | 31(1)        |
| C6  | 12098(2) | 6729(2)  | 4430(1)  | 22(1)        |
| O1  | 11993(1) | 5790(1)  | 4278(1)  | 31(1)        |
| C7  | 13933(2) | 6481(2)  | 4852(1)  | 46(1)        |
| C8  | 8222(2)  | 7565(2)  | 3788(1)  | 23(1)        |
| C9  | 7858(2)  | 6565(2)  | 3739(1)  | 26(1)        |
| C10 | 6695(2)  | 6293(2)  | 3538(1)  | 32(1)        |
| F1  | 6087(1)  | 7160(1)  | 3397(1)  | 47(1)        |
| F2  | 6425(1)  | 5782(1)  | 4075(1)  | 52(1)        |
| F3  | 6444(1)  | 5670(1)  | 2967(1)  | 57(1)        |

|     | <b>x</b> | <b>y</b> | <b>z</b> | <b>U(eq)</b> |
|-----|----------|----------|----------|--------------|
| N2  | -574(1)  | 5956(1)  | 2382(1)  | 23(1)        |
| C14 | -1360(2) | 4195(2)  | 2242(1)  | 19(1)        |
| C12 | 527(2)   | 4370(2)  | 2602(1)  | 19(1)        |
| C11 | 374(2)   | 5485(2)  | 2565(1)  | 21(1)        |
| C13 | -368(2)  | 3723(2)  | 2437(1)  | 20(1)        |
| C15 | -1425(2) | 5312(2)  | 2224(1)  | 23(1)        |
| O4  | -3203(1) | 4080(1)  | 1866(1)  | 31(1)        |
| C16 | -2314(2) | 3499(2)  | 2062(1)  | 21(1)        |
| O3  | -2297(1) | 2529(1)  | 2086(1)  | 28(1)        |
| C17 | -4180(2) | 3482(2)  | 1693(1)  | 38(1)        |
| C18 | 1581(2)  | 3873(2)  | 2804(1)  | 24(1)        |
| C19 | 2491(2)  | 4393(2)  | 2969(1)  | 28(1)        |
| C20 | 3520(2)  | 3833(2)  | 3176(1)  | 38(1)        |
| F4  | 3445(1)  | 2764(1)  | 3169(1)  | 52(1)        |
| F6  | 4140(1)  | 4072(1)  | 2734(1)  | 65(1)        |
| F5  | 4071(1)  | 4096(1)  | 3838(1)  | 68(1)        |
| O5  | 7884(1)  | 799(1)   | 3533(1)  | 32(1)        |
| O6  | 6826(1)  | 2210(1)  | 3559(1)  | 31(1)        |
| N3  | 9269(2)  | 4317(1)  | 4167(1)  | 27(1)        |
| C22 | 10524(2) | 2861(2)  | 4255(1)  | 21(1)        |
| C23 | 9695(2)  | 2135(2)  | 4029(1)  | 21(1)        |
| C25 | 8487(2)  | 3602(2)  | 3950(1)  | 25(1)        |
| C24 | 8660(2)  | 2511(2)  | 3875(1)  | 21(1)        |
| C21 | 10259(2) | 3941(2)  | 4315(1)  | 25(1)        |
| C26 | 7773(2)  | 1738(2)  | 3639(1)  | 24(1)        |
| C27 | 5925(2)  | 1501(2)  | 3353(2)  | 45(1)        |
| C28 | 11646(2) | 2562(2)  | 4452(1)  | 23(1)        |
| C29 | 12016(2) | 1568(2)  | 4520(1)  | 24(1)        |
| C30 | 13184(2) | 1300(2)  | 4763(1)  | 32(1)        |
| F9  | 13773(1) | 2173(1)  | 4925(1)  | 50(1)        |
| F7  | 13512(1) | 772(1)   | 4271(1)  | 59(1)        |
| F8  | 13366(1) | 701(1)   | 5355(1)  | 54(1)        |

**Table 3. Bond lengths (Å) and angles (°) for VitaminB3\_CF3\_alkene.**

|         |          |
|---------|----------|
| N1-C5   | 1.337(3) |
| N1-C1   | 1.339(3) |
| C2-C3   | 1.397(3) |
| C2-C1   | 1.399(3) |
| C2-C8   | 1.465(3) |
| C3-C4   | 1.382(3) |
| C4-C5   | 1.393(3) |
| C4-C6   | 1.487(3) |
| O2-C6   | 1.337(2) |
| O2-C7   | 1.445(3) |
| C6-O1   | 1.205(2) |
| C8-C9   | 1.327(3) |
| C9-C10  | 1.507(3) |
| C10-F3  | 1.315(3) |
| C10-F1  | 1.328(3) |
| C10-F2  | 1.331(3) |
| N2-C11  | 1.333(3) |
| N2-C15  | 1.341(3) |
| C14-C13 | 1.385(3) |
| C14-C15 | 1.394(3) |
| C14-C16 | 1.485(3) |
| C12-C13 | 1.388(3) |
| C12-C11 | 1.402(3) |
| C12-C18 | 1.469(3) |
| O4-C16  | 1.338(3) |
| O4-C17  | 1.441(3) |
| C16-O3  | 1.209(2) |
| C18-C19 | 1.319(3) |
| C19-C20 | 1.476(3) |
| C20-F5  | 1.335(3) |
| C20-F4  | 1.336(3) |
| C20-F6  | 1.342(3) |



|           |            |
|-----------|------------|
| O5-C26    | 1.202(3)   |
| O6-C26    | 1.342(3)   |
| O6-C27    | 1.444(3)   |
| N3-C21    | 1.336(3)   |
| N3-C25    | 1.339(3)   |
| C22-C23   | 1.394(3)   |
| C22-C21   | 1.400(3)   |
| C22-C28   | 1.465(3)   |
| C23-C24   | 1.388(3)   |
| C25-C24   | 1.391(3)   |
| C24-C26   | 1.487(3)   |
| C28-C29   | 1.323(3)   |
| C29-C30   | 1.514(3)   |
| C30-F7    | 1.306(3)   |
| C30-F9    | 1.323(3)   |
| C30-F8    | 1.329(3)   |
| C5-N1-C1  | 117.23(19) |
| C3-C2-C1  | 117.5(2)   |
| C3-C2-C8  | 124.16(19) |
| C1-C2-C8  | 118.3(2)   |
| C4-C3-C2  | 119.01(19) |
| N1-C1-C2  | 124.0(2)   |
| C3-C4-C5  | 118.9(2)   |
| C3-C4-C6  | 119.22(18) |
| C5-C4-C6  | 121.8(2)   |
| N1-C5-C4  | 123.3(2)   |
| C6-O2-C7  | 115.07(19) |
| O1-C6-O2  | 123.8(2)   |
| O1-C6-C4  | 124.22(19) |
| O2-C6-C4  | 111.98(18) |
| C9-C8-C2  | 124.8(2)   |
| C8-C9-C10 | 123.2(2)   |
| F3-C10-F1 | 107.4(2)   |
| F3-C10-F2 | 107.6(2)   |

|             |            |
|-------------|------------|
| F1-C10-F2   | 106.64(19) |
| F3-C10-C9   | 111.84(19) |
| F1-C10-C9   | 112.4(2)   |
| F2-C10-C9   | 110.68(18) |
| C11-N2-C15  | 117.11(18) |
| C13-C14-C15 | 118.54(19) |
| C13-C14-C16 | 119.13(19) |
| C15-C14-C16 | 122.33(19) |
| C13-C12-C11 | 117.55(19) |
| C13-C12-C18 | 119.56(19) |
| C11-C12-C18 | 122.88(19) |
| N2-C11-C12  | 124.1(2)   |
| C14-C13-C12 | 119.34(19) |
| N2-C15-C14  | 123.4(2)   |
| C16-O4-C17  | 116.07(18) |
| O3-C16-O4   | 123.9(2)   |
| O3-C16-C14  | 124.6(2)   |
| O4-C16-C14  | 111.48(18) |
| C19-C18-C12 | 125.7(2)   |
| C18-C19-C20 | 122.4(2)   |
| F5-C20-F4   | 105.9(2)   |
| F5-C20-F6   | 106.3(2)   |
| F4-C20-F6   | 105.6(2)   |
| F5-C20-C19  | 112.2(2)   |
| F4-C20-C19  | 114.1(2)   |
| F6-C20-C19  | 112.1(2)   |
| C26-O6-C27  | 115.23(19) |
| C21-N3-C25  | 116.93(19) |
| C23-C22-C21 | 117.4(2)   |
| C23-C22-C28 | 124.21(19) |
| C21-C22-C28 | 118.32(19) |
| C24-C23-C22 | 118.97(19) |
| N3-C25-C24  | 123.4(2)   |
| C23-C24-C25 | 118.8(2)   |

|             |            |
|-------------|------------|
| C23-C24-C26 | 119.15(19) |
| C25-C24-C26 | 122.0(2)   |
| N3-C21-C22  | 124.4(2)   |
| O5-C26-O6   | 123.6(2)   |
| O5-C26-C24  | 124.4(2)   |
| O6-C26-C24  | 112.03(19) |
| C29-C28-C22 | 125.4(2)   |
| C28-C29-C30 | 123.4(2)   |
| F7-C30-F9   | 107.9(2)   |
| F7-C30-F8   | 108.2(2)   |
| F9-C30-F8   | 106.93(18) |
| F7-C30-C29  | 112.01(18) |
| F9-C30-C29  | 111.8(2)   |
| F8-C30-C29  | 109.7(2)   |

**Table 4. Anisotropic displacement parameters ( $\text{\AA}^2 \times 10^3$ ) for VitaminB3\_CF3\_alkene.**

The anisotropic displacement factor exponent takes the form:  $-2\pi^2 [h^2 a^{*2} U^{11} + \dots + 2 h k a^* b^* U^{12}]$

|     | $U^{11}$ | $U^{22}$ | $U^{33}$ | $U^{23}$ | $U^{13}$ | $U^{12}$ |
|-----|----------|----------|----------|----------|----------|----------|
| N1  | 38(1)    | 17(1)    | 29(1)    | -2(1)    | -2(1)    | -3(1)    |
| C2  | 30(1)    | 17(1)    | 19(1)    | 2(1)     | 2(1)     | 2(1)     |
| C3  | 26(1)    | 14(1)    | 19(1)    | -0(1)    | -0(1)    | 2(1)     |
| C1  | 36(1)    | 15(1)    | 25(1)    | 2(1)     | 2(1)     | 3(1)     |
| C4  | 27(1)    | 18(1)    | 17(1)    | 0(1)     | 0(1)     | -0(1)    |
| C5  | 33(1)    | 21(1)    | 23(1)    | -0(1)    | -0(1)    | -6(1)    |
| O2  | 24(1)    | 28(1)    | 39(1)    | 5(1)     | 5(1)     | -6(1)    |
| C6  | 23(1)    | 22(1)    | 22(1)    | 3(1)     | 3(1)     | -4(1)    |
| O1  | 27(1)    | 19(1)    | 47(1)    | 1(1)     | 1(1)     | 0(1)     |
| C7  | 20(1)    | 42(2)    | 71(2)    | 21(1)    | 21(1)    | -1(1)    |
| C8  | 28(1)    | 20(1)    | 24(1)    | 2(1)     | 2(1)     | 8(1)     |
| C9  | 24(1)    | 22(1)    | 30(1)    | 1(1)     | 1(1)     | 6(1)     |
| C10 | 36(1)    | 29(1)    | 32(1)    | 1(1)     | 1(1)     | 13(1)    |
| F1  | 28(1)    | 40(1)    | 74(1)    | 4(1)     | 4(1)     | 12(1)    |

|     | U <sup>11</sup> | U <sup>22</sup> | U <sup>33</sup> | U <sup>23</sup> | U <sup>13</sup> | U <sup>12</sup> |
|-----|-----------------|-----------------|-----------------|-----------------|-----------------|-----------------|
| F2  | 39(1)           | 55(1)           | 65(1)           | 13(1)           | 13(1)           | -11(1)          |
| F3  | 33(1)           | 66(1)           | 70(1)           | -36(1)          | -36(1)          | -10(1)          |
| N2  | 25(1)           | 17(1)           | 27(1)           | 0(1)            | 0(1)            | 1(1)            |
| C14 | 25(1)           | 17(1)           | 17(1)           | -1(1)           | -1(1)           | -2(1)           |
| C12 | 24(1)           | 19(1)           | 15(1)           | 0(1)            | 0(1)            | -0(1)           |
| C11 | 25(1)           | 18(1)           | 22(1)           | -1(1)           | -1(1)           | -2(1)           |
| C13 | 27(1)           | 17(1)           | 17(1)           | -1(1)           | -1(1)           | -2(1)           |
| C15 | 26(1)           | 19(1)           | 24(1)           | 1(1)            | 1(1)            | 2(1)            |
| O4  | 21(1)           | 24(1)           | 45(1)           | -1(1)           | -1(1)           | -1(1)           |
| C16 | 25(1)           | 21(1)           | 19(1)           | -2(1)           | -2(1)           | -2(1)           |
| O3  | 30(1)           | 20(1)           | 35(1)           | -0(1)           | -0(1)           | -4(1)           |
| C17 | 23(1)           | 32(1)           | 58(2)           | -2(1)           | -2(1)           | -4(1)           |
| C18 | 28(1)           | 21(1)           | 23(1)           | 1(1)            | 1(1)            | 2(1)            |
| C19 | 25(1)           | 28(1)           | 32(1)           | 2(1)            | 2(1)            | 3(1)            |
| C20 | 31(1)           | 40(2)           | 46(1)           | 8(1)            | 8(1)            | 5(1)            |
| F4  | 38(1)           | 34(1)           | 82(1)           | 11(1)           | 11(1)           | 14(1)           |
| F6  | 40(1)           | 66(1)           | 99(1)           | 22(1)           | 22(1)           | 11(1)           |
| F5  | 43(1)           | 77(1)           | 67(1)           | -12(1)          | -12(1)          | 17(1)           |
| O5  | 27(1)           | 20(1)           | 46(1)           | -2(1)           | -2(1)           | 1(1)            |
| O6  | 25(1)           | 25(1)           | 43(1)           | -1(1)           | -1(1)           | 3(1)            |
| N3  | 40(1)           | 16(1)           | 25(1)           | 0(1)            | 0(1)            | 3(1)            |
| C22 | 29(1)           | 16(1)           | 18(1)           | 1(1)            | 1(1)            | -1(1)           |
| C23 | 30(1)           | 14(1)           | 19(1)           | 1(1)            | 1(1)            | 1(1)            |
| C25 | 32(1)           | 19(1)           | 24(1)           | 3(1)            | 3(1)            | 4(1)            |
| C24 | 28(1)           | 18(1)           | 18(1)           | 0(1)            | 0(1)            | 0(1)            |
| C21 | 37(1)           | 15(1)           | 22(1)           | 0(1)            | 0(1)            | -3(1)           |
| C26 | 25(1)           | 22(1)           | 24(1)           | 2(1)            | 2(1)            | 3(1)            |
| C27 | 23(1)           | 38(2)           | 71(2)           | 2(1)            | 2(1)            | -3(1)           |
| C28 | 27(1)           | 21(1)           | 22(1)           | -0(1)           | -0(1)           | -6(1)           |
| C29 | 24(1)           | 21(1)           | 26(1)           | -2(1)           | -2(1)           | -4(1)           |
| C30 | 47(2)           | 25(1)           | 24(1)           | -5(1)           | -5(1)           | -15(1)          |
| F9  | 31(1)           | 40(1)           | 75(1)           | -4(1)           | -4(1)           | -12(1)          |
| F7  | 38(1)           | 76(1)           | 58(1)           | -24(1)          | -24(1)          | 20(1)           |

|    | U <sup>11</sup> | U <sup>22</sup> | U <sup>33</sup> | U <sup>23</sup> | U <sup>13</sup> | U <sup>12</sup> |
|----|-----------------|-----------------|-----------------|-----------------|-----------------|-----------------|
| F8 | 39(1)           | 55(1)           | 59(1)           | 23(1)           | 23(1)           | 6(1)            |

**Table 5. Hydrogen coordinates (x10<sup>4</sup>) and isotropic displacement parameters (Å<sup>2</sup>x10<sup>3</sup>) for VitaminB3\_CF3\_alkene.**

|      | x     | y    | z    | U(eq) |
|------|-------|------|------|-------|
| H3   | 10042 | 6392 | 4000 | 23    |
| H1   | 9035  | 9443 | 4111 | 29    |
| H5   | 12085 | 8845 | 4625 | 30    |
| H7A  | 13818 | 5892 | 5163 | 70    |
| H7B  | 14573 | 6878 | 5091 | 70    |
| H7C  | 14018 | 6187 | 4395 | 70    |
| H8   | 7718  | 8129 | 3668 | 28    |
| H9   | 8356  | 5993 | 3835 | 31    |
| H11  | 983   | 5932 | 2677 | 25    |
| H13  | -300  | 2964 | 2459 | 24    |
| H15  | -2107 | 5633 | 2092 | 27    |
| H17A | -4183 | 2991 | 1293 | 56    |
| H17B | -4778 | 3980 | 1553 | 56    |
| H17C | -4243 | 3069 | 2115 | 56    |
| H18  | 1610  | 3111 | 2819 | 28    |
| H19  | 2484  | 5155 | 2953 | 34    |
| H23  | 9835  | 1393 | 3982 | 25    |
| H25  | 7777  | 3853 | 3842 | 30    |
| H21  | 10821 | 4439 | 4470 | 29    |
| H27A | 5922  | 1157 | 2893 | 67    |
| H27B | 5271  | 1916 | 3302 | 67    |
| H27C | 5969  | 950  | 3724 | 67    |
| H28  | 12150 | 3128 | 4537 | 28    |
| H29  | 11524 | 992  | 4411 | 29    |

### X-ray data of 3q

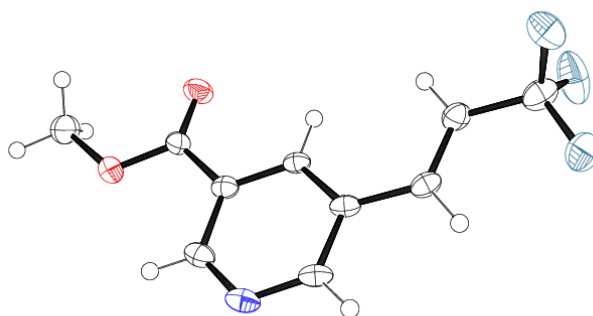

Figure S2. ORTEP plot of the molecular structure.

### Cyclic voltammograms

Cyclic voltammetry experiments were performed using Hokutodenkou HZ-5000 analyzer under N<sub>2</sub> at room temperature (observed in 0.002 M CH<sub>3</sub>CN; [(NBu<sub>4</sub>)PF<sub>6</sub>]= 0.1 M; Ag/AgCl = electrode; reported with respect to the [FeCp<sub>2</sub>]/[FeCp<sub>2</sub>]+couple).

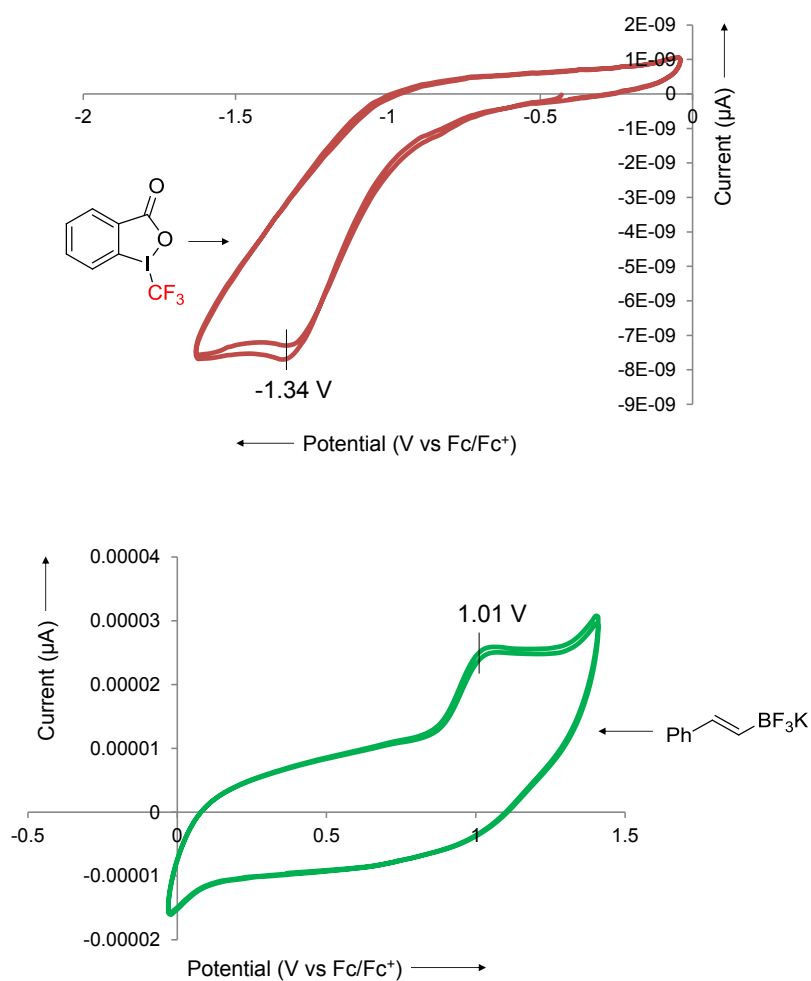



## References

- [1] a) H. B. Ross, M. Boldaji, D. P. Rillema, C. B. Blanton and R. P. White, *Inorg. Chem.* **1989**, 28, 1013; b) A. B. Tamayo, B. D. Alleyne, P. I. Djurovich, S. Lamansky, I. Tsyba, N. N. Ho, R. Bau, M. E. Thompson, *J. Am. Chem. Soc.* **2003**, 125, 7377.
- [2] a) M. Weber, F. V. Singh, A. S. Vieira, H. A. Stefani, M. W. Paixão, *Tetrahedron Lett.* **2009**, 50, 4324; b) K. Brak, J. A. Ellman, *J. Am. Chem. Soc.* **2009**, 131, 3850; c) G. W. Kabalka, A. R. Mereddy, J. F. Green, *J. Label. Compd. Radiopharm.* **2006**, 49, 11; d) S. Elsheimer, C. J. Foti, M. D. Bartberger, *J. Org. Chem.* **1996**, 61, 6252.
- [3] ASTRAZENECA AB; ASTRAZENECA UK LIMITED, WO2005/60970 A1, **2005**, 148.
- [4] Y. Yu, R. Lin, P. J. Connolly, US2008/103172 A1, **2008**, 13.

# NMR data

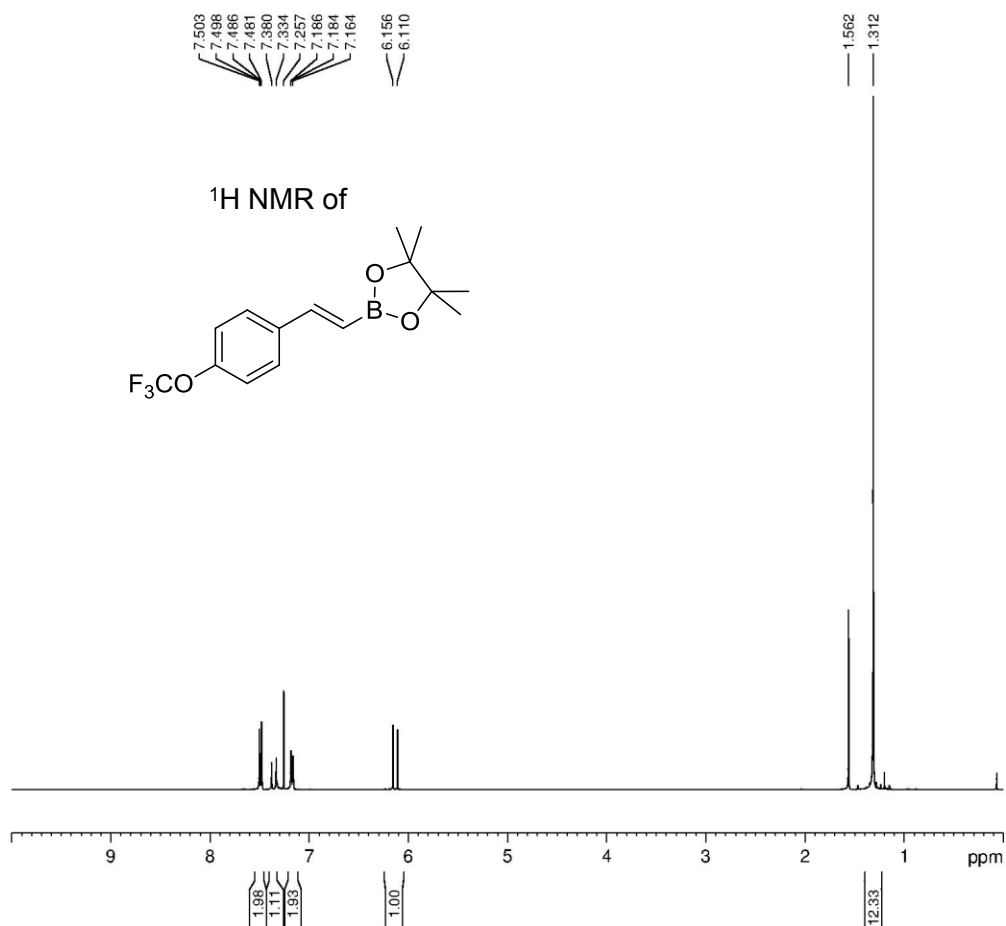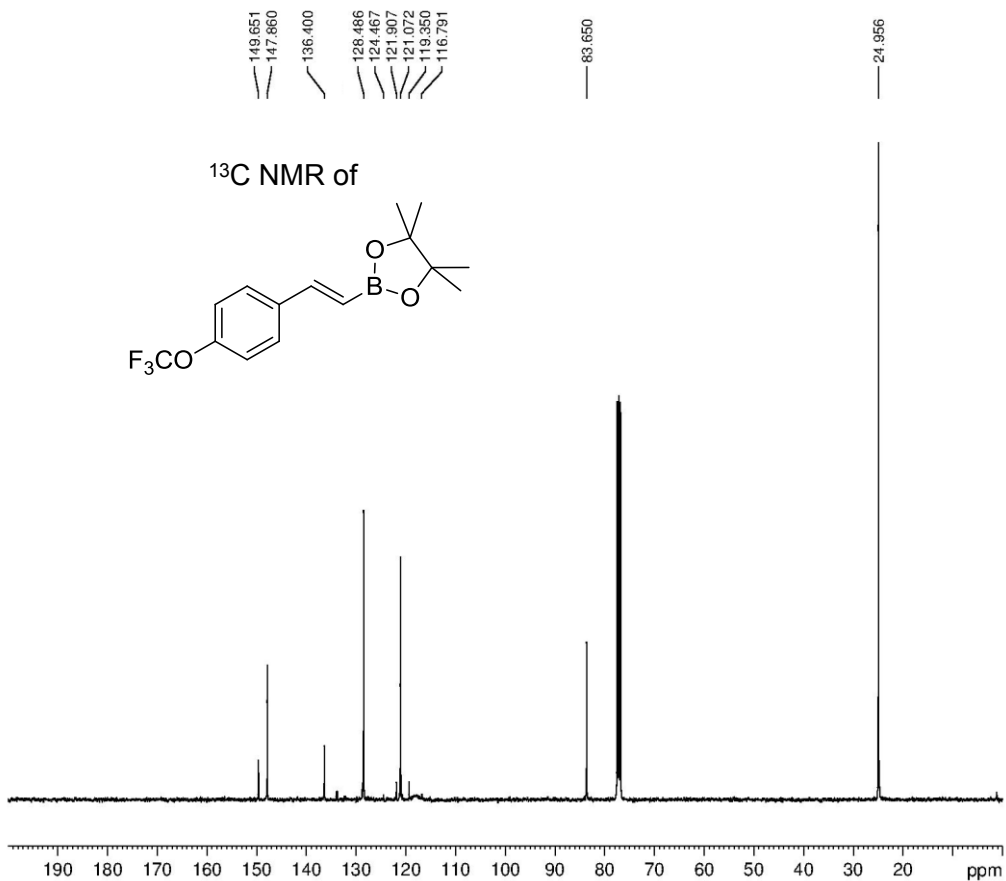

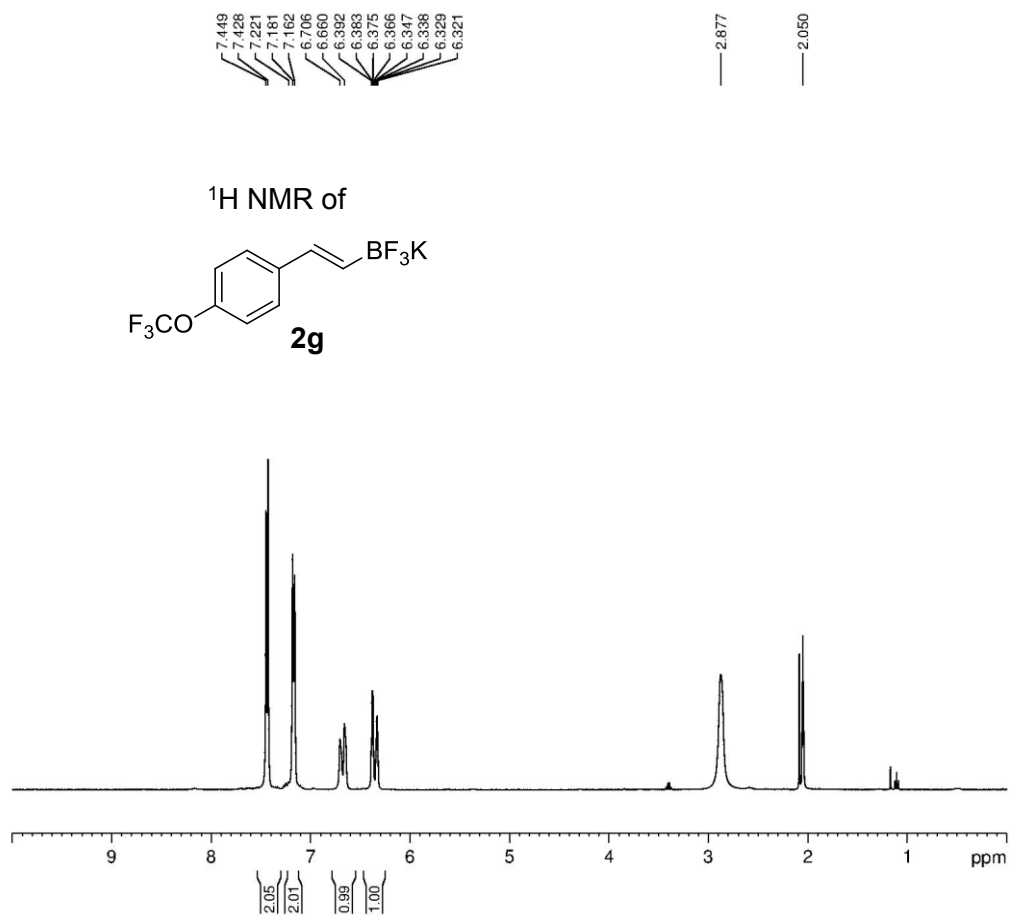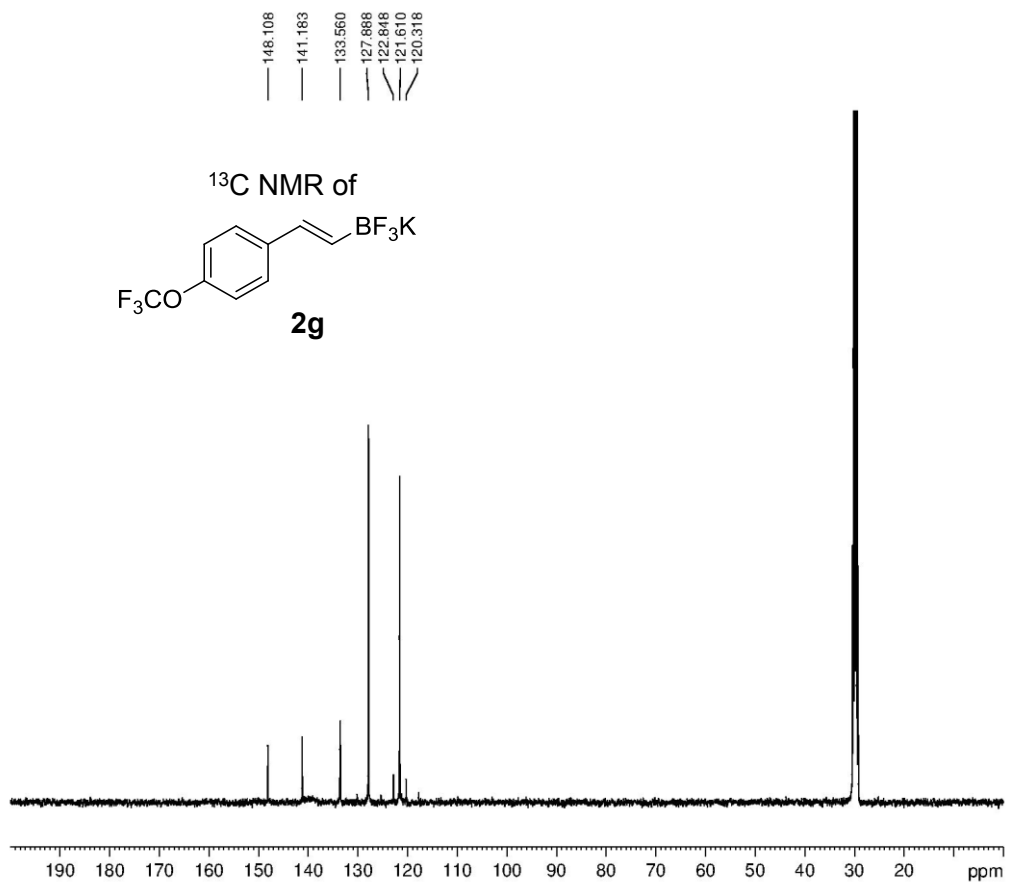

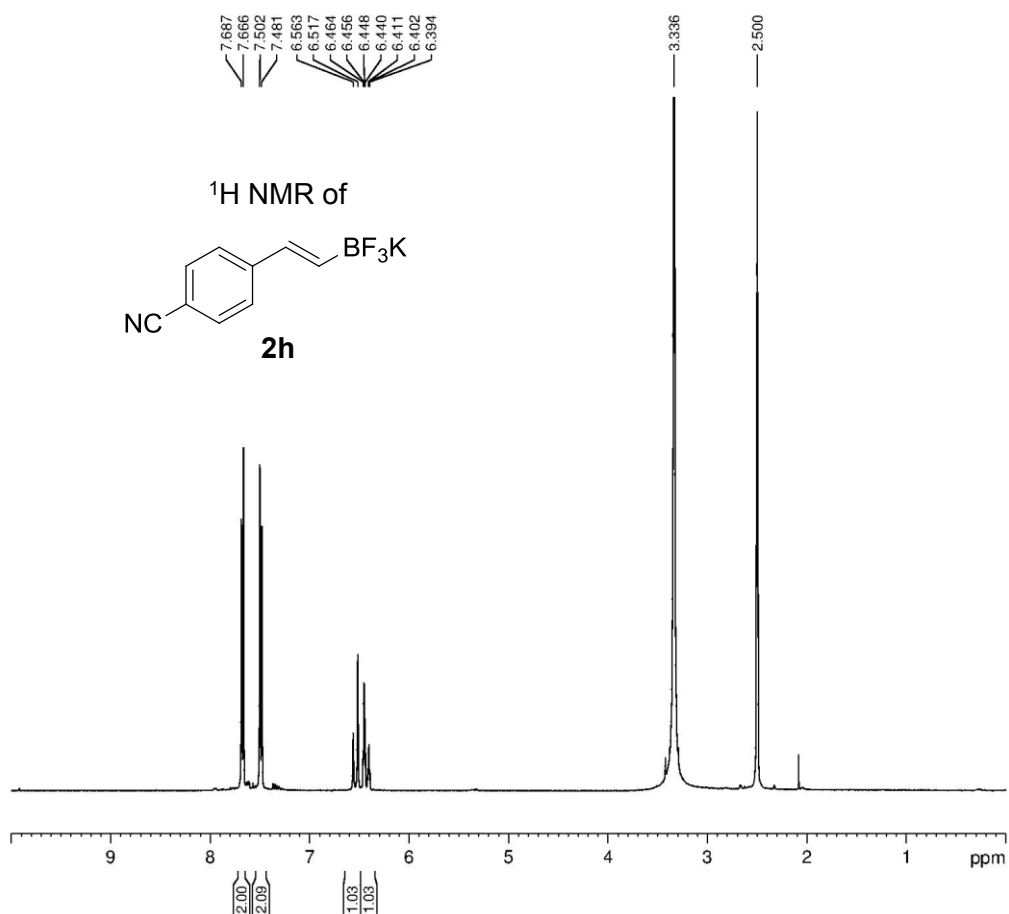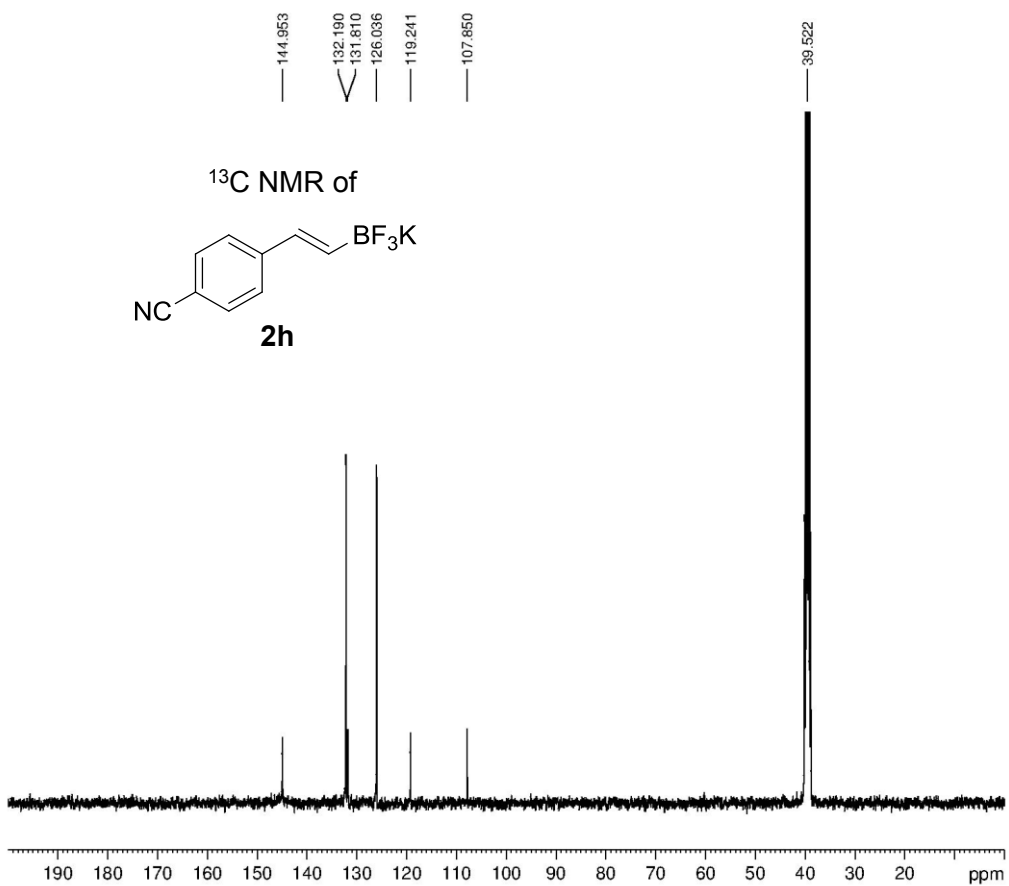

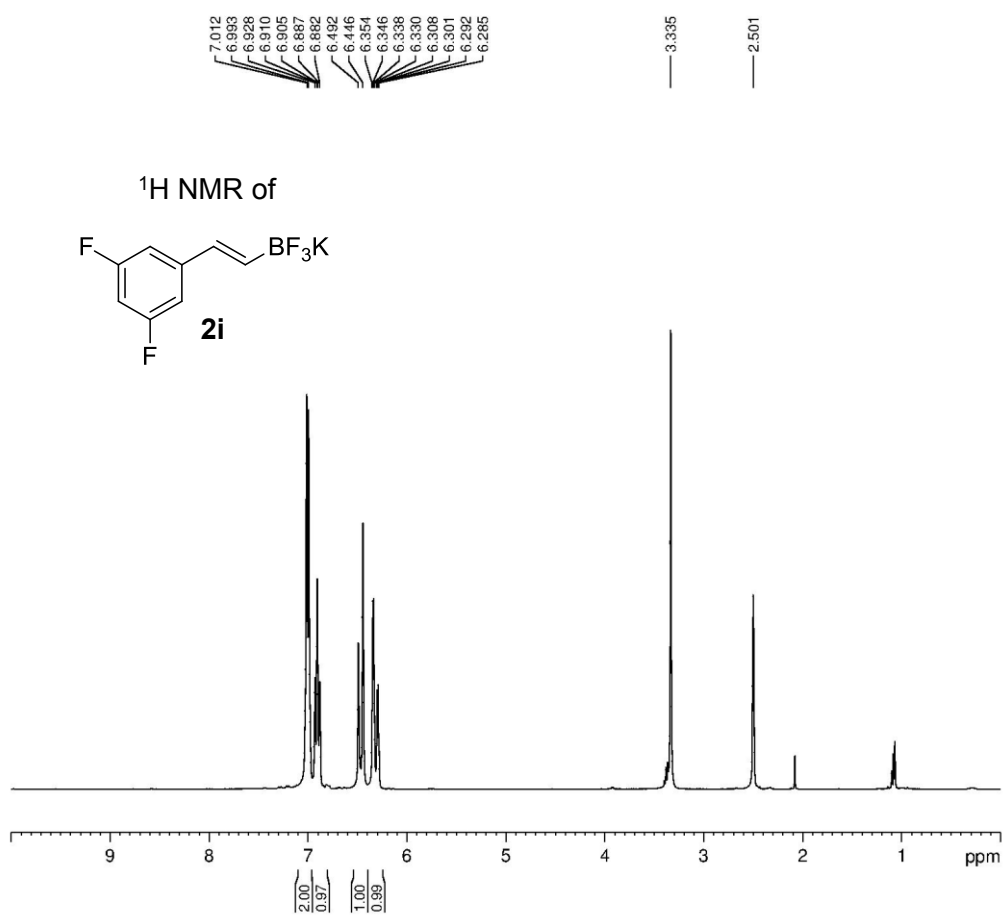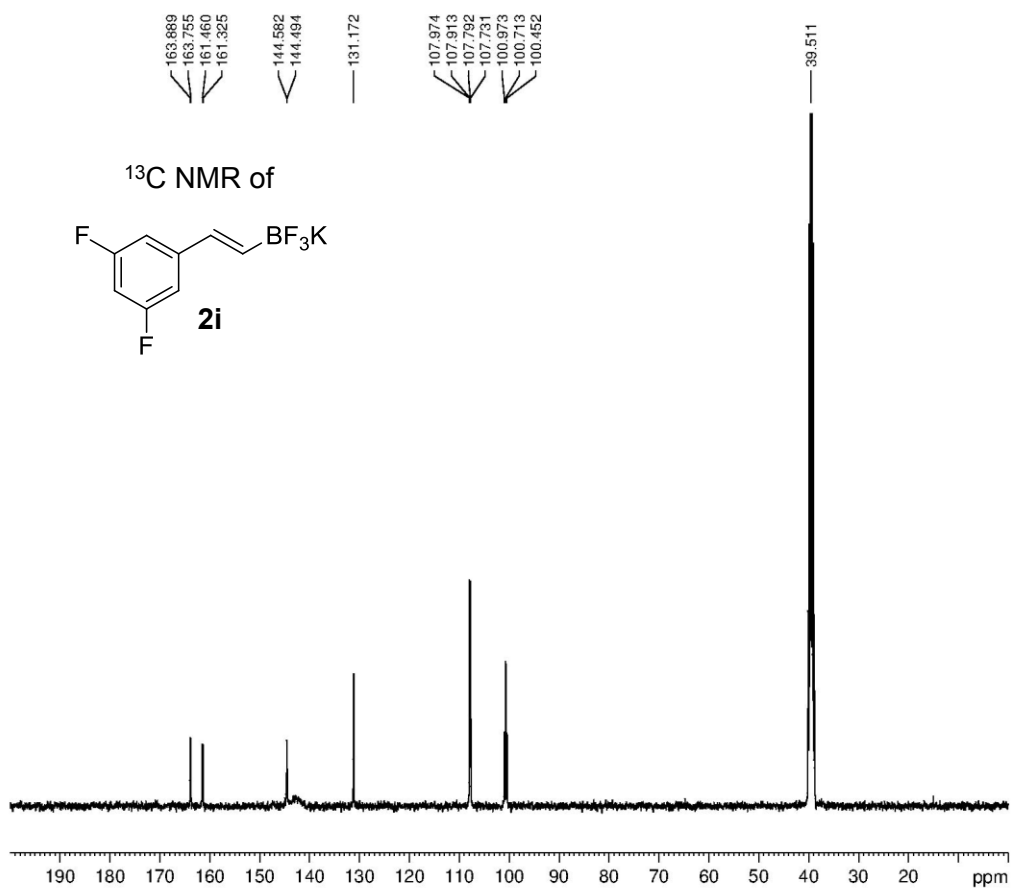

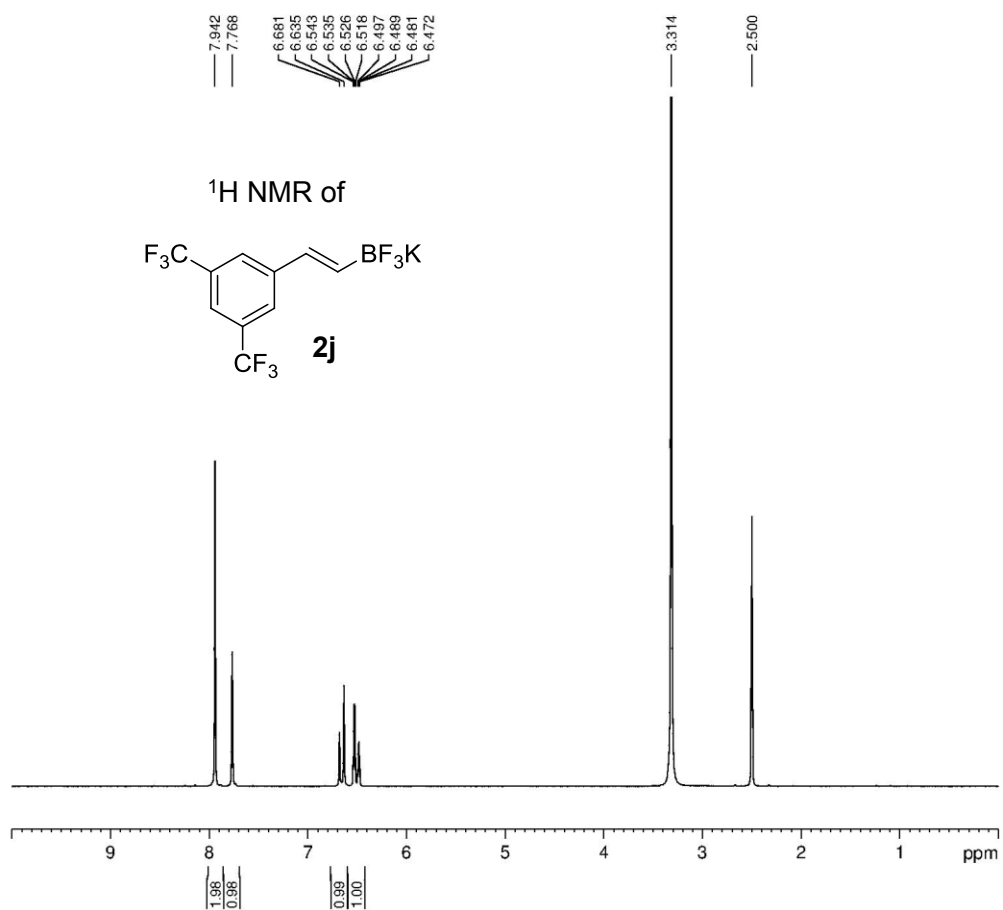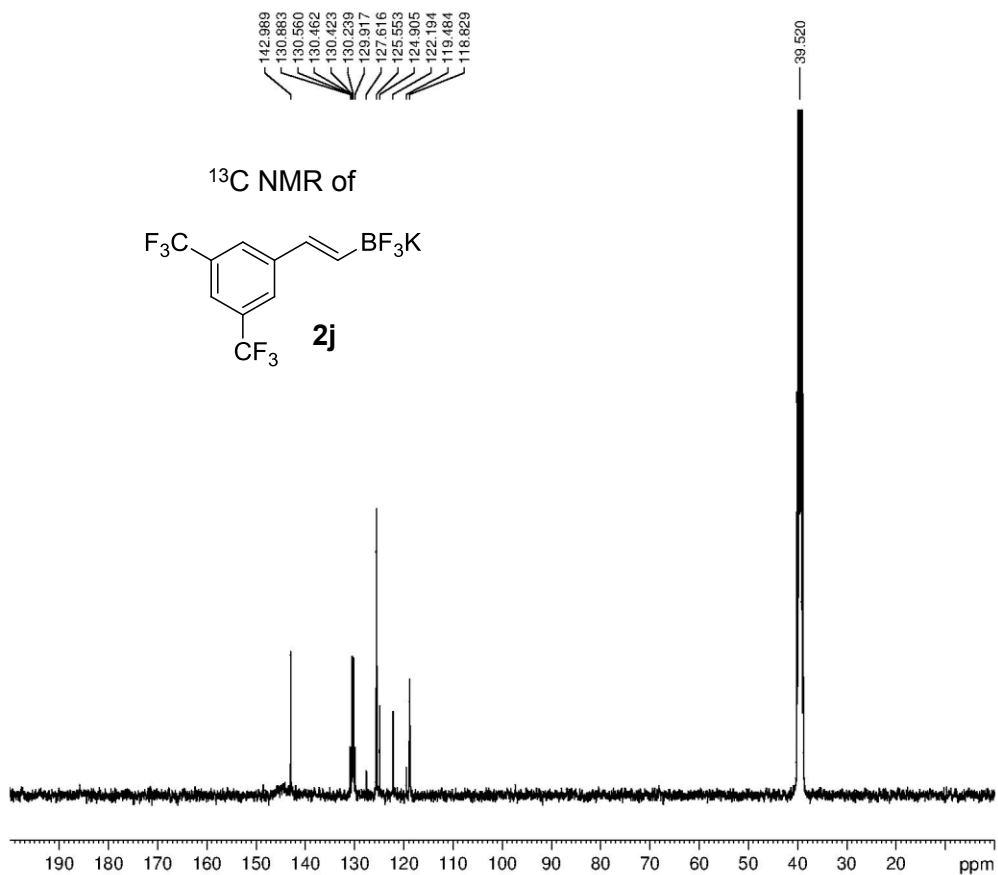

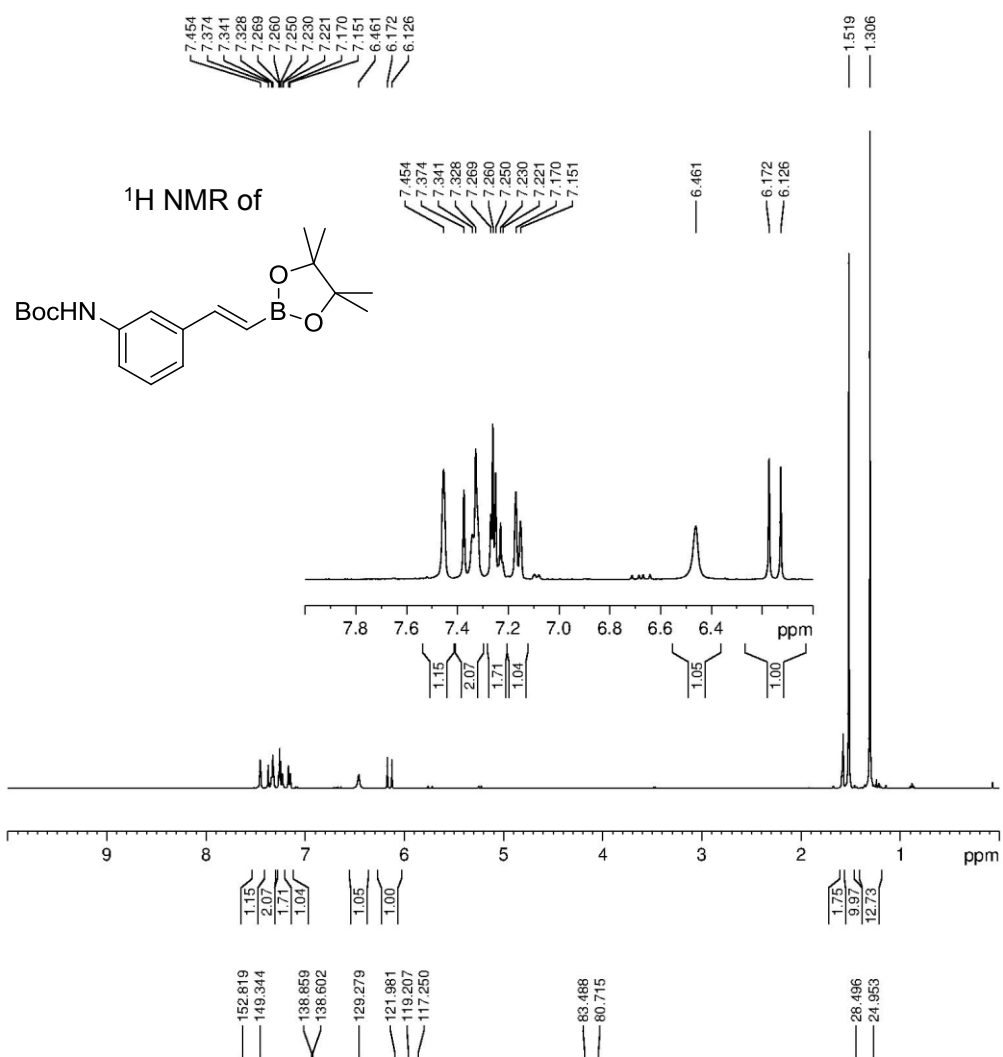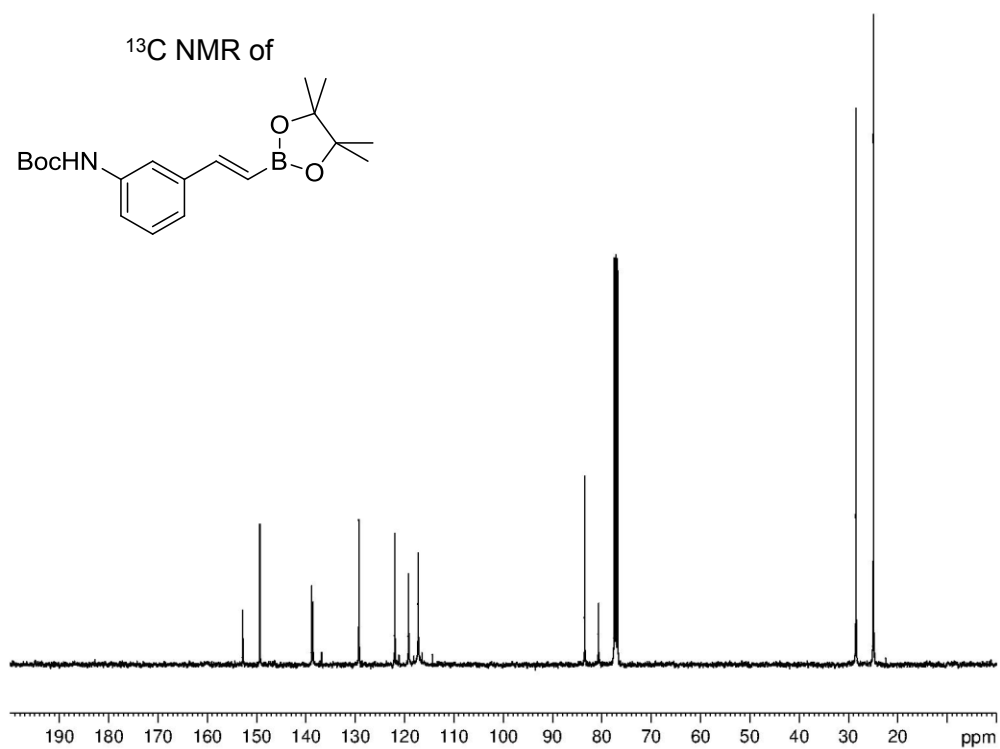



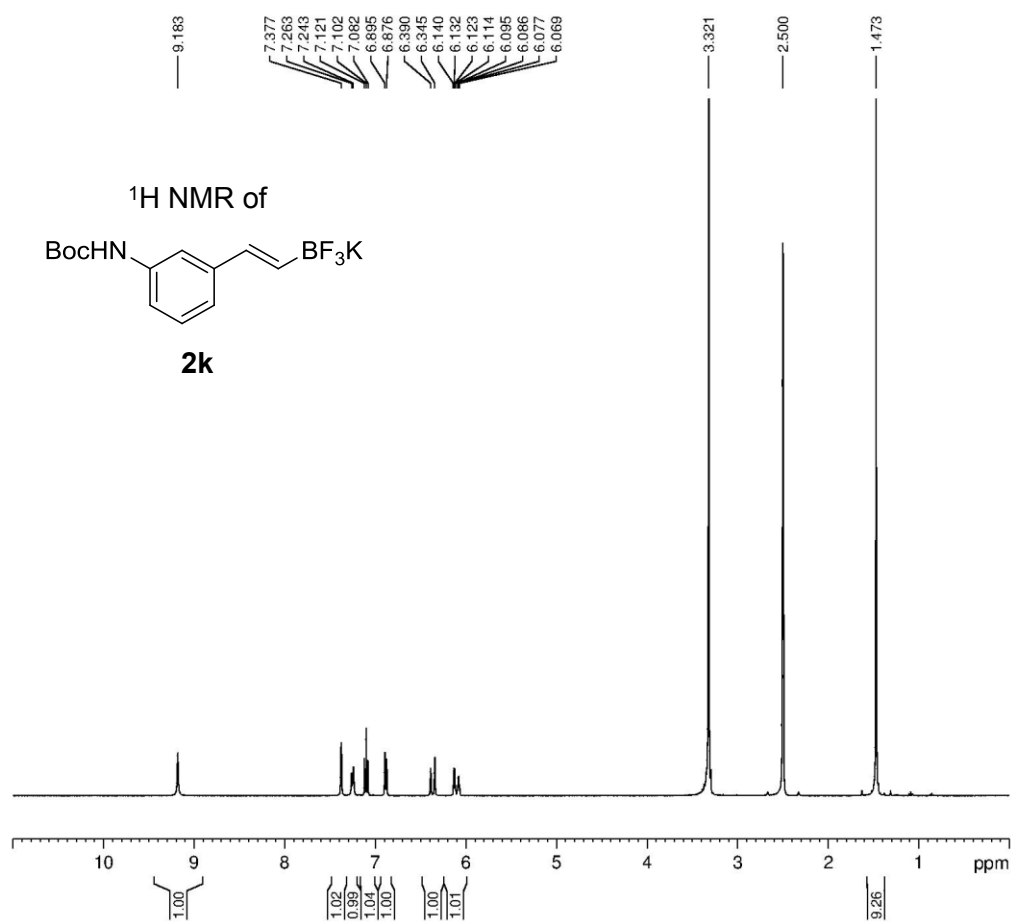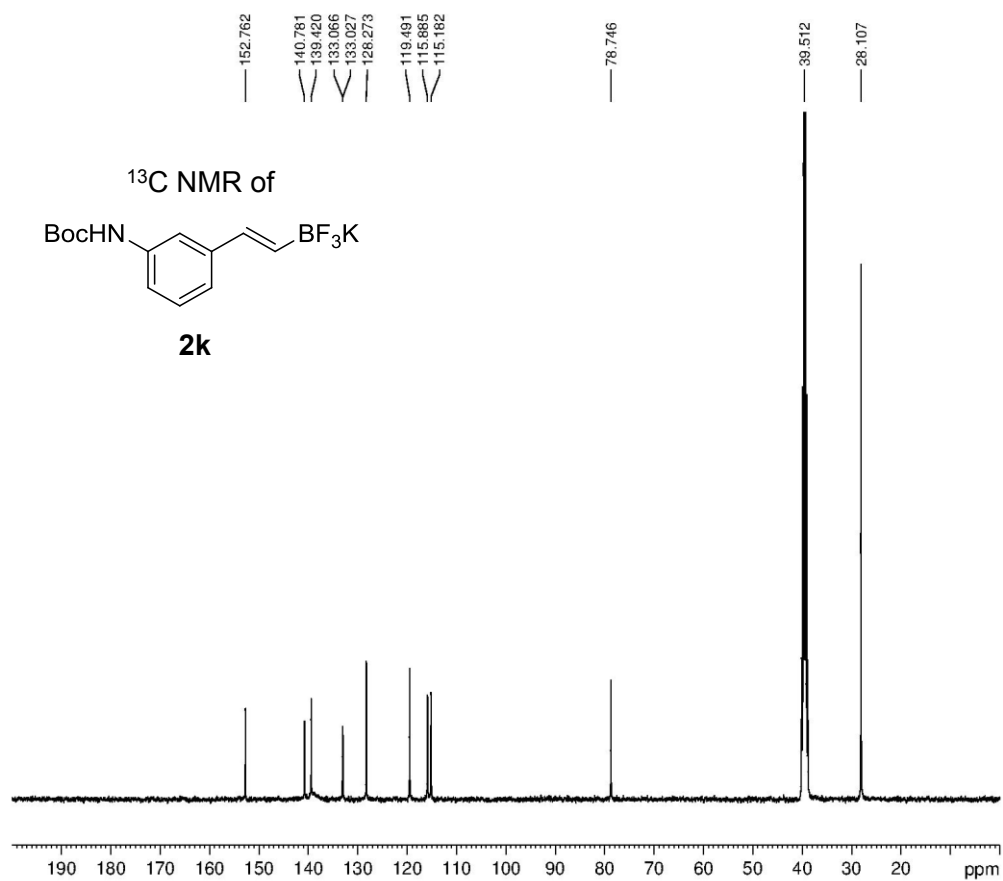

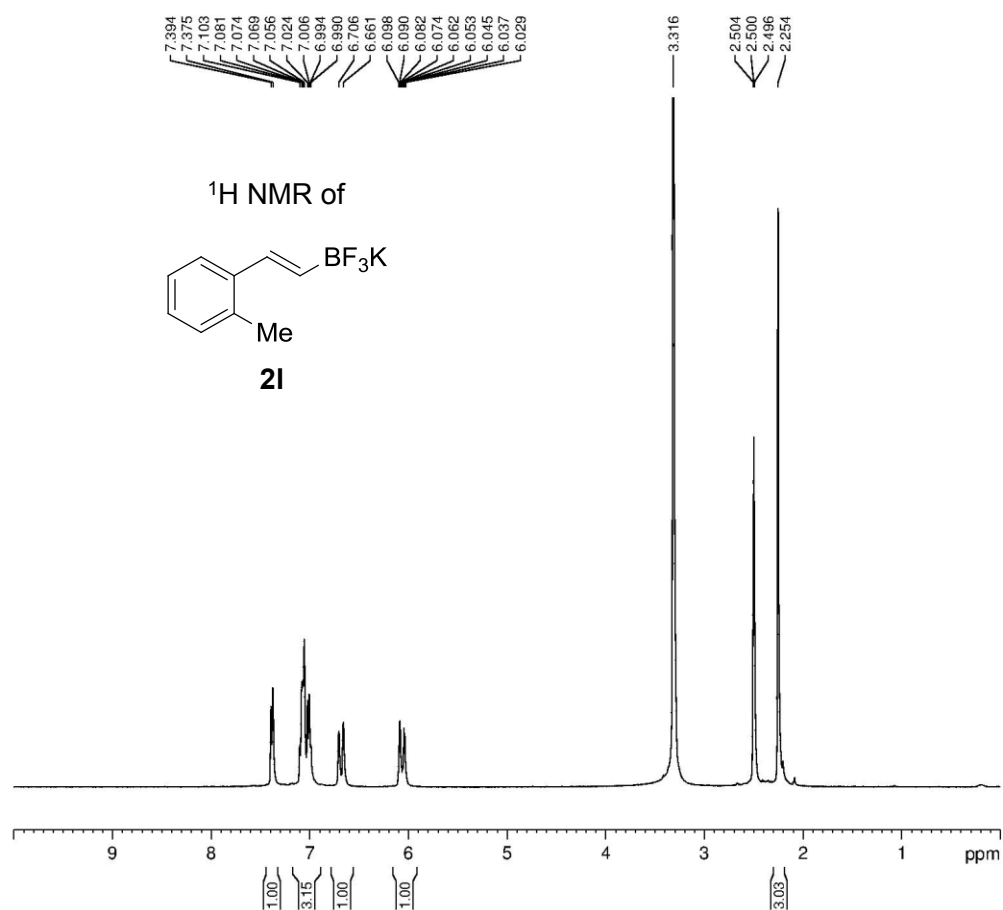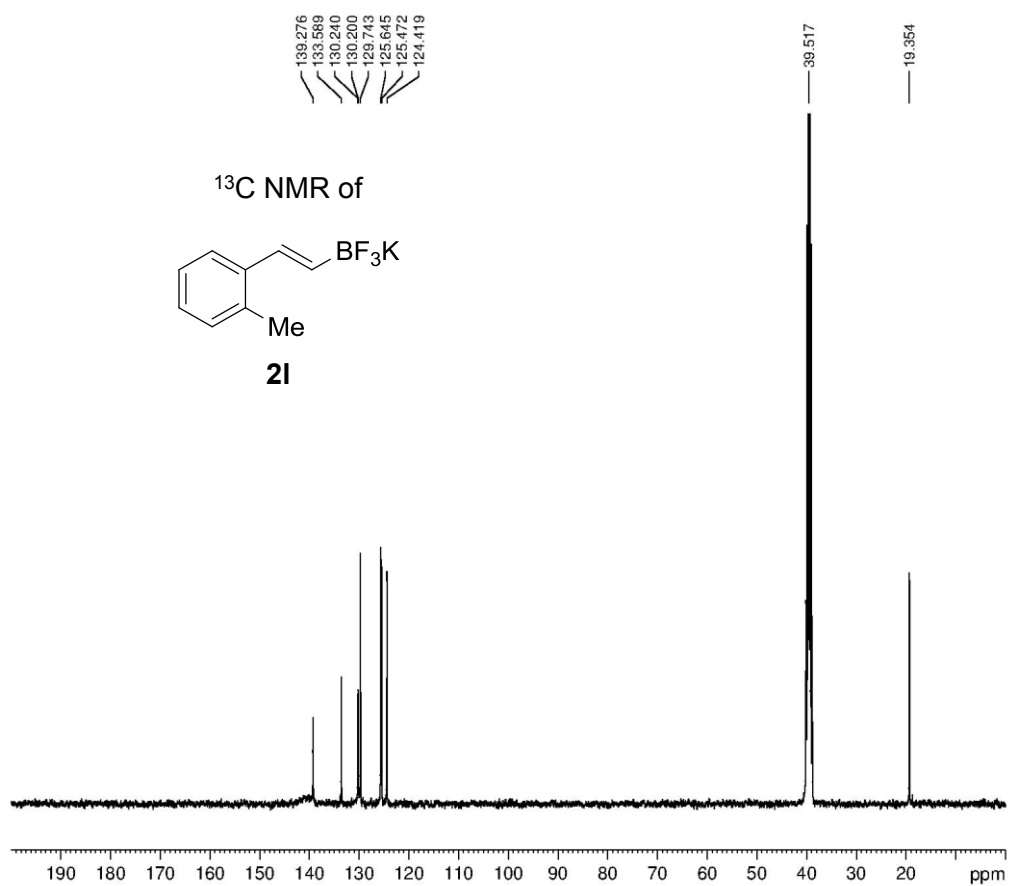

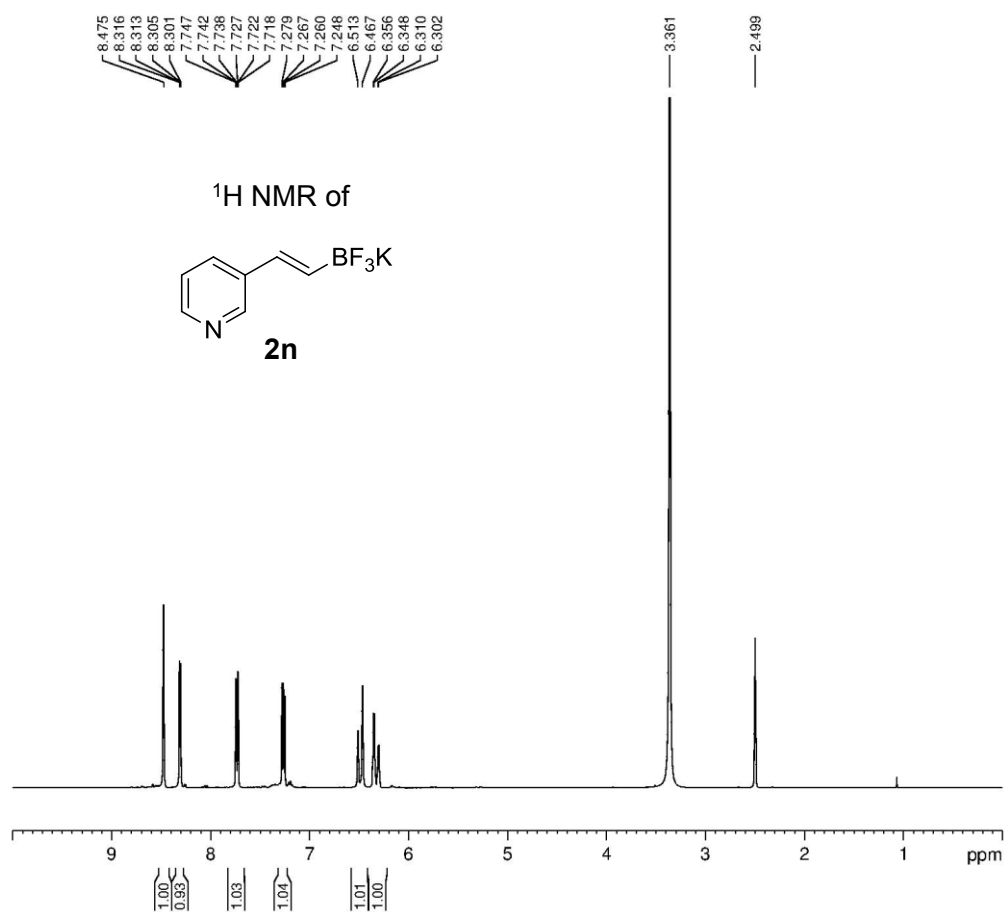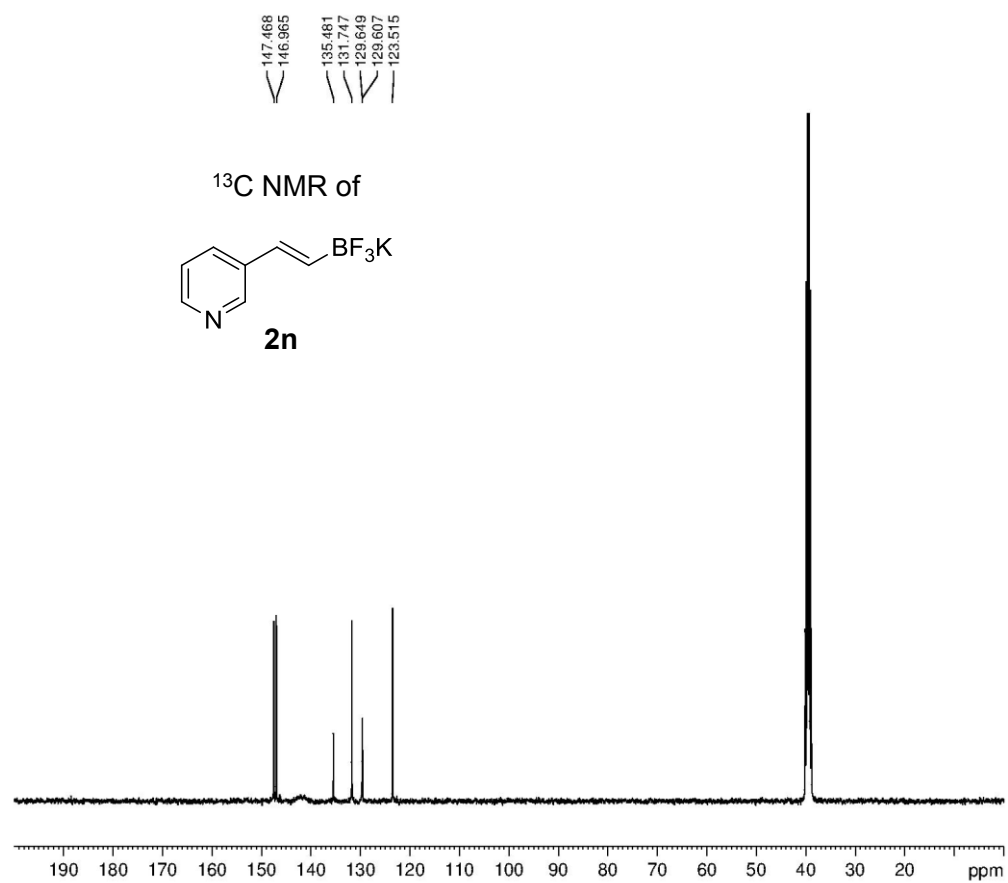

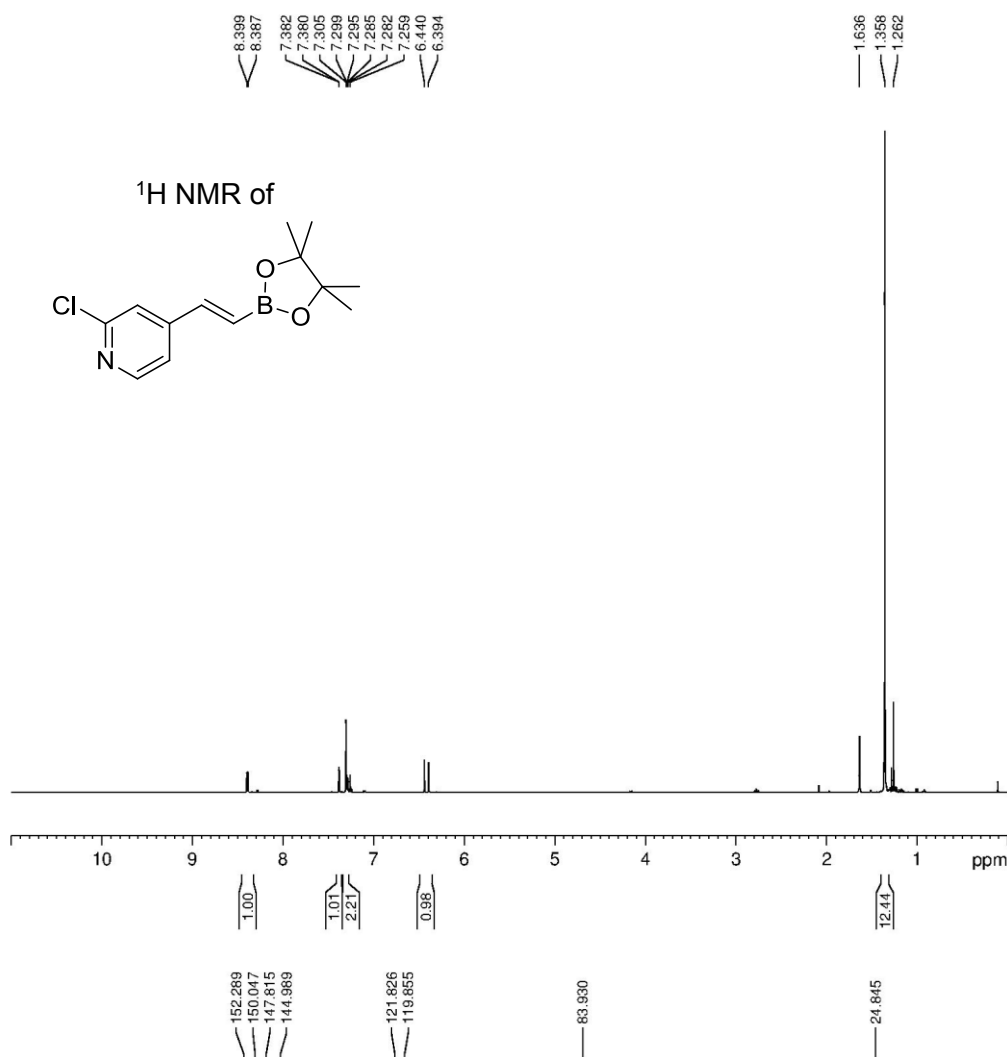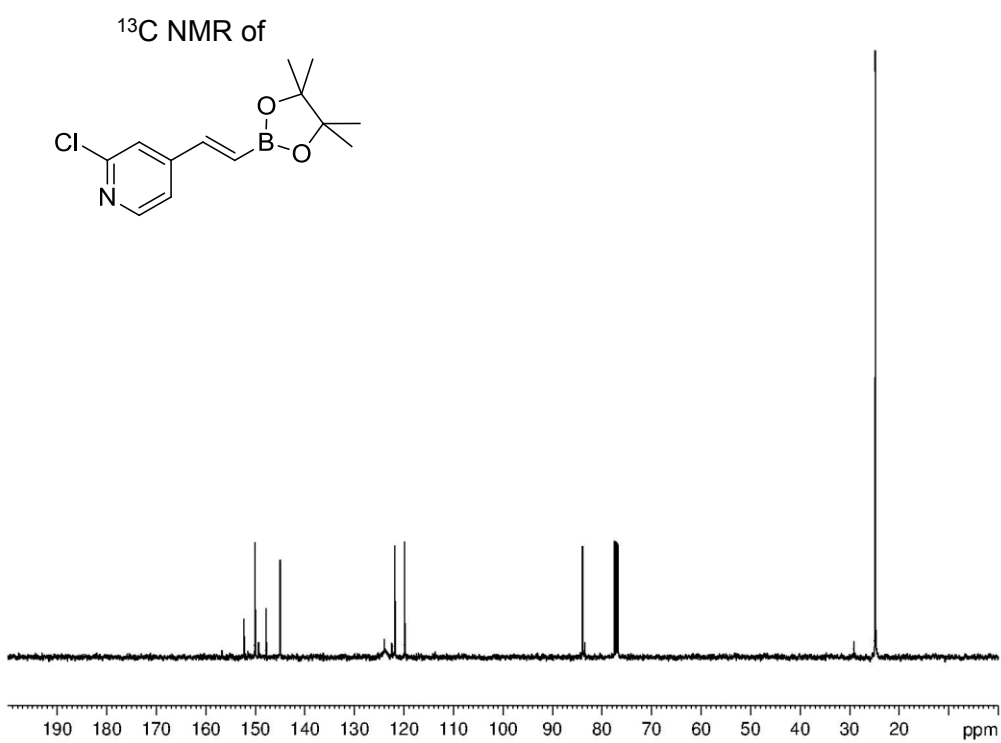

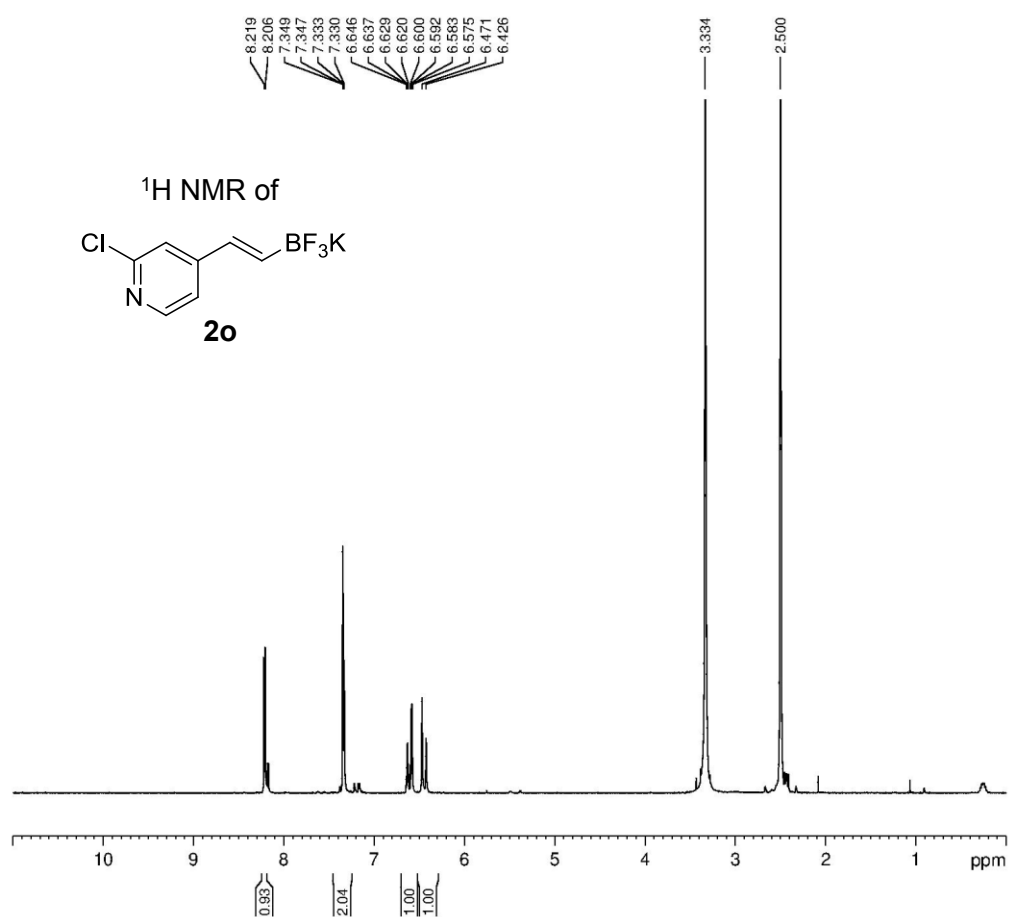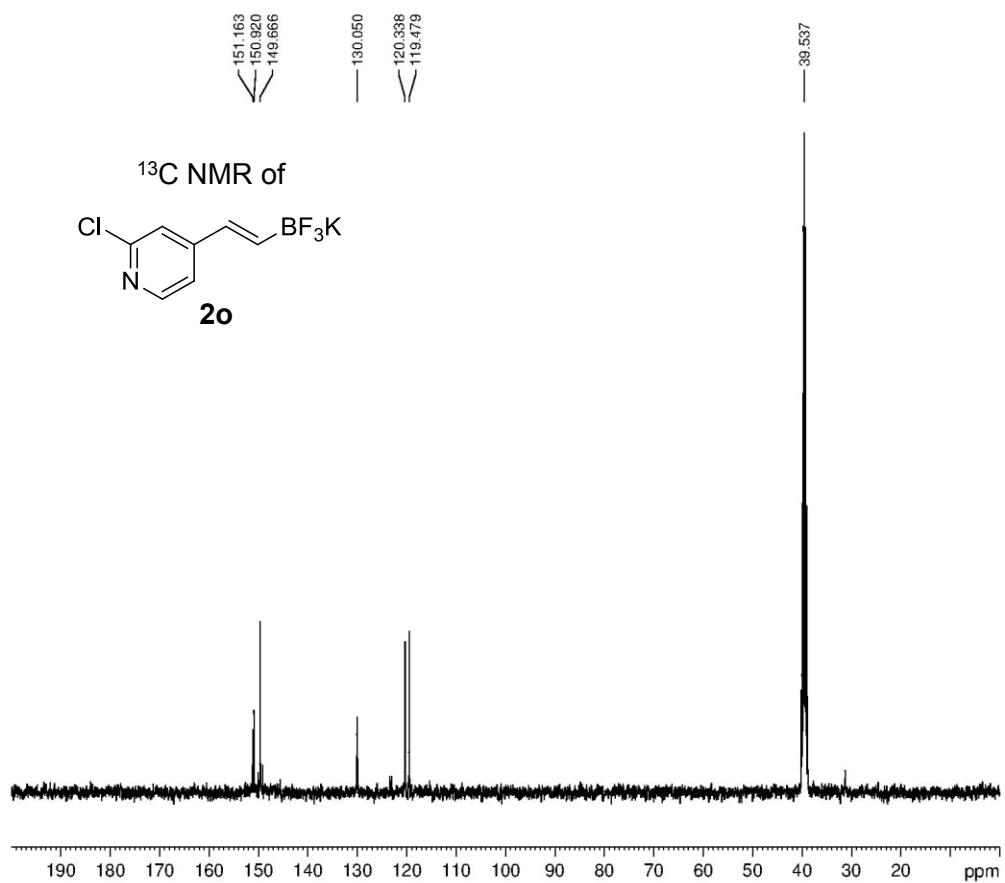

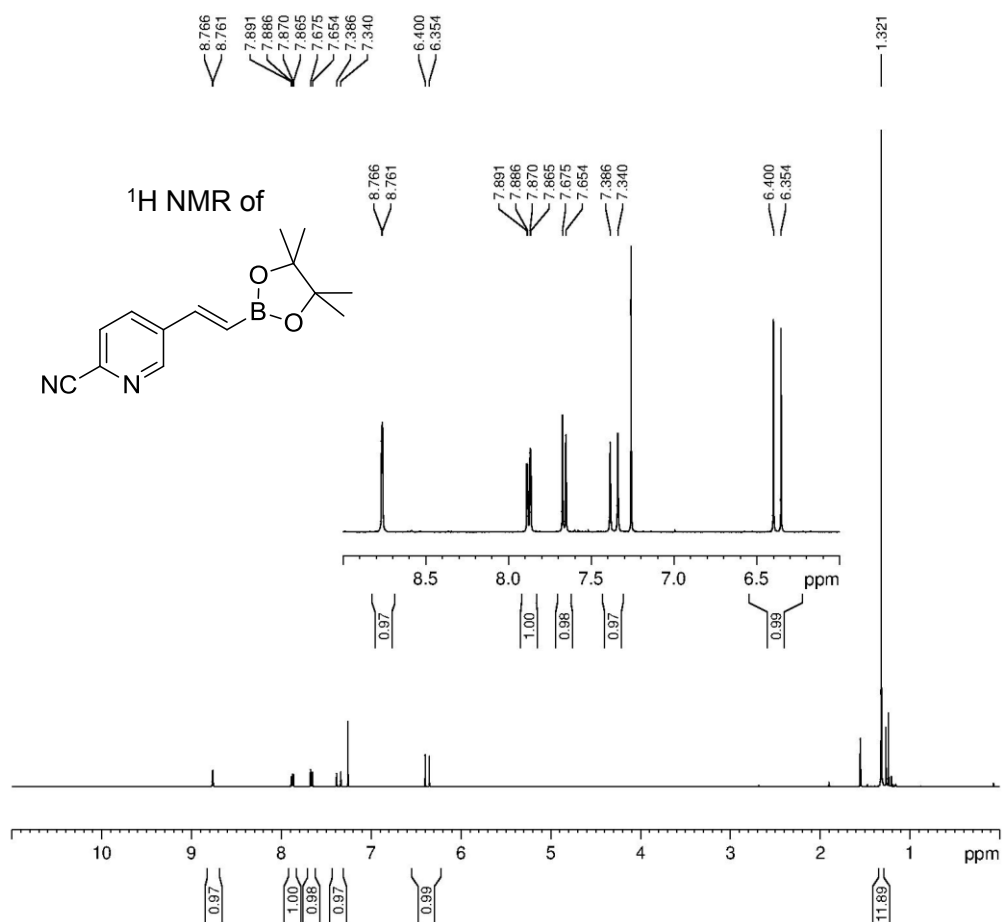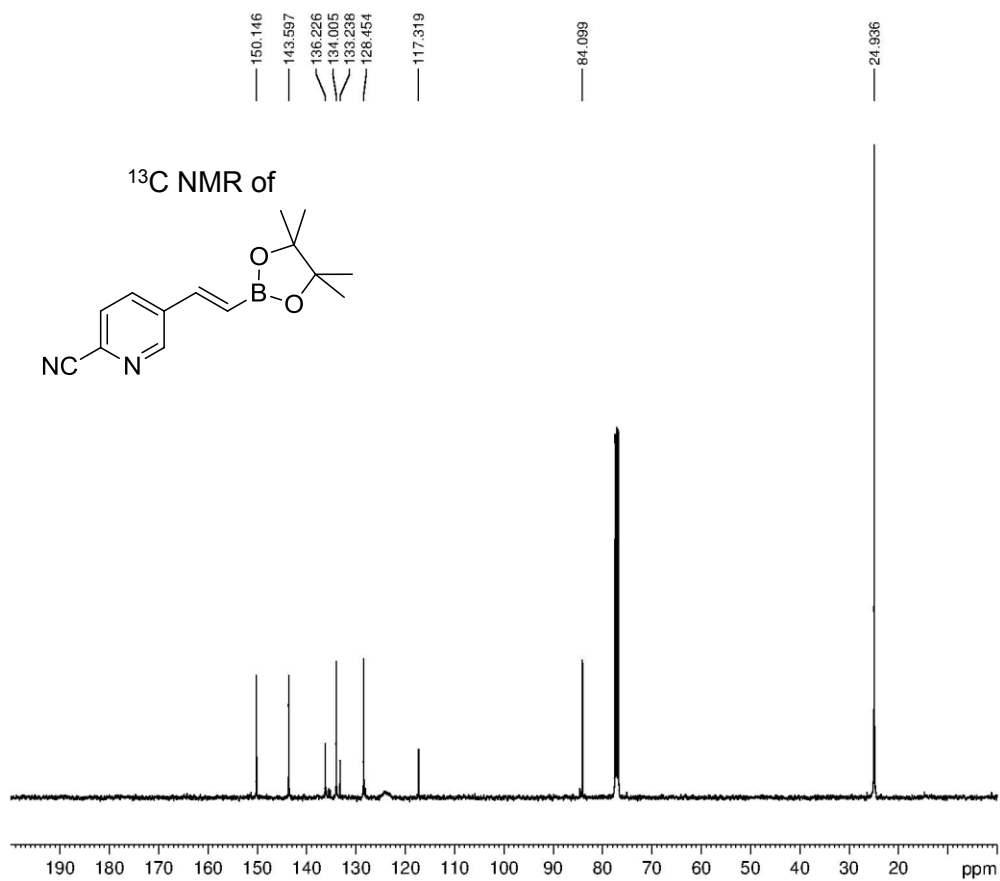

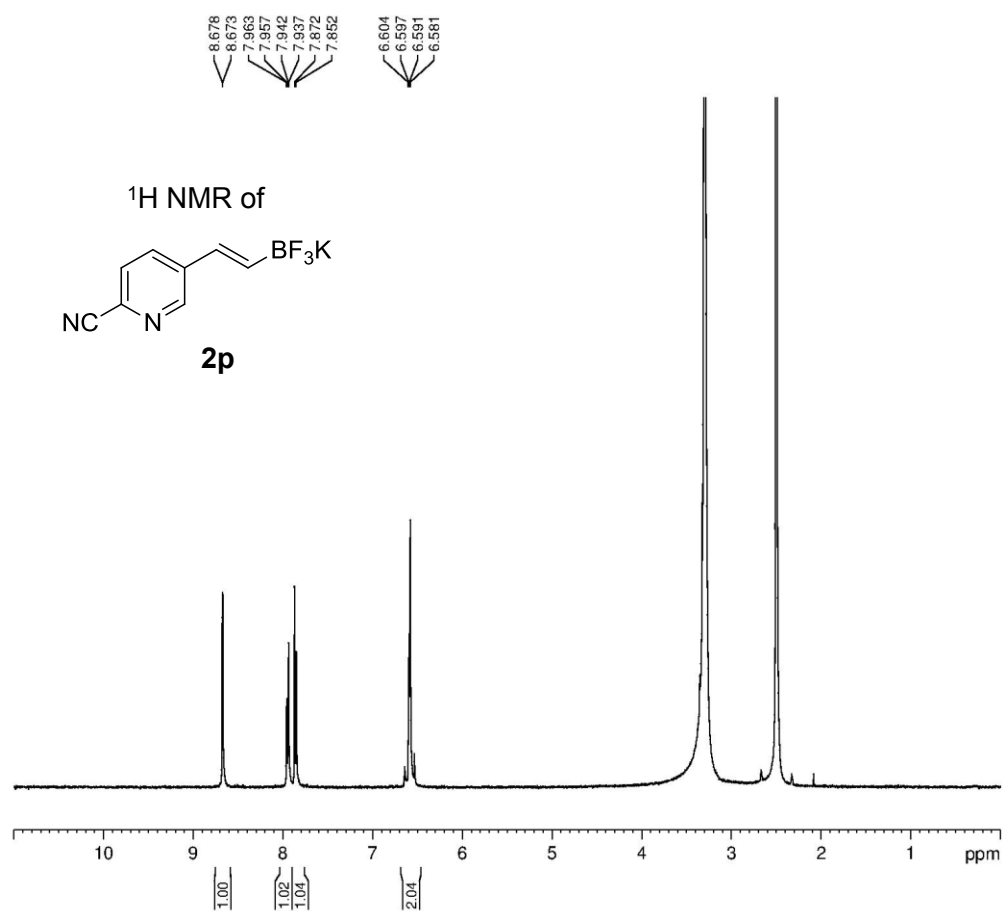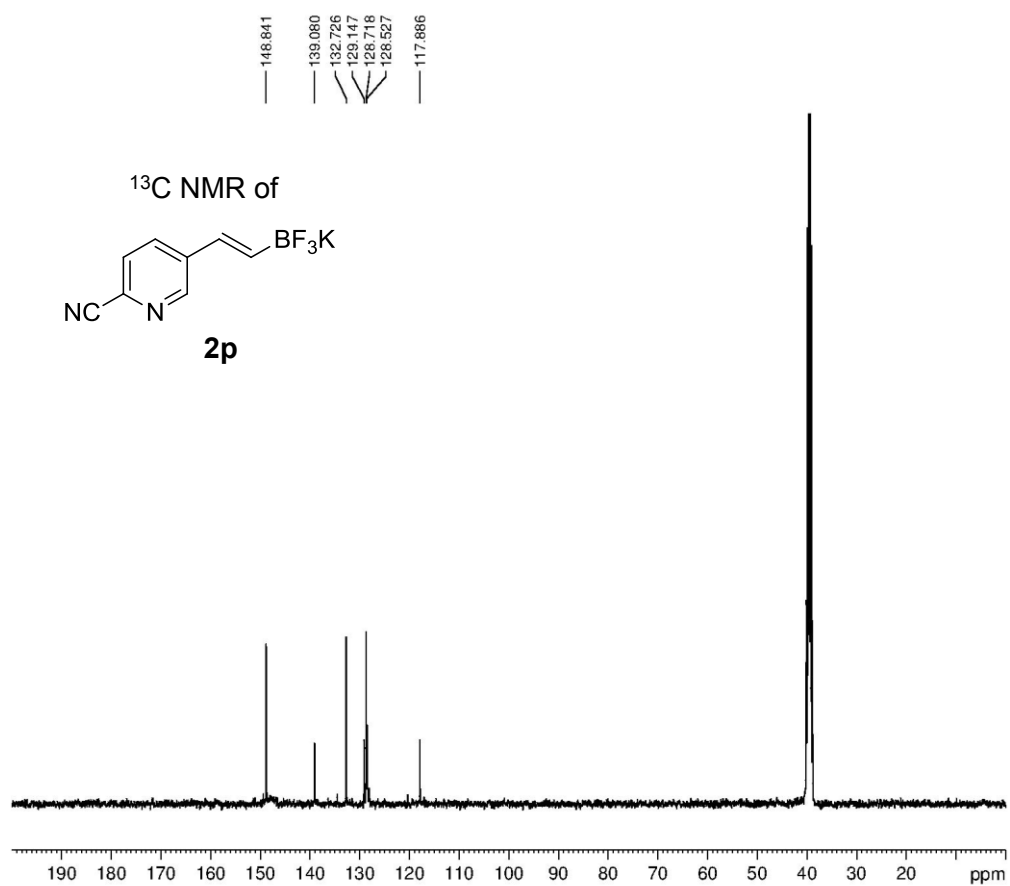



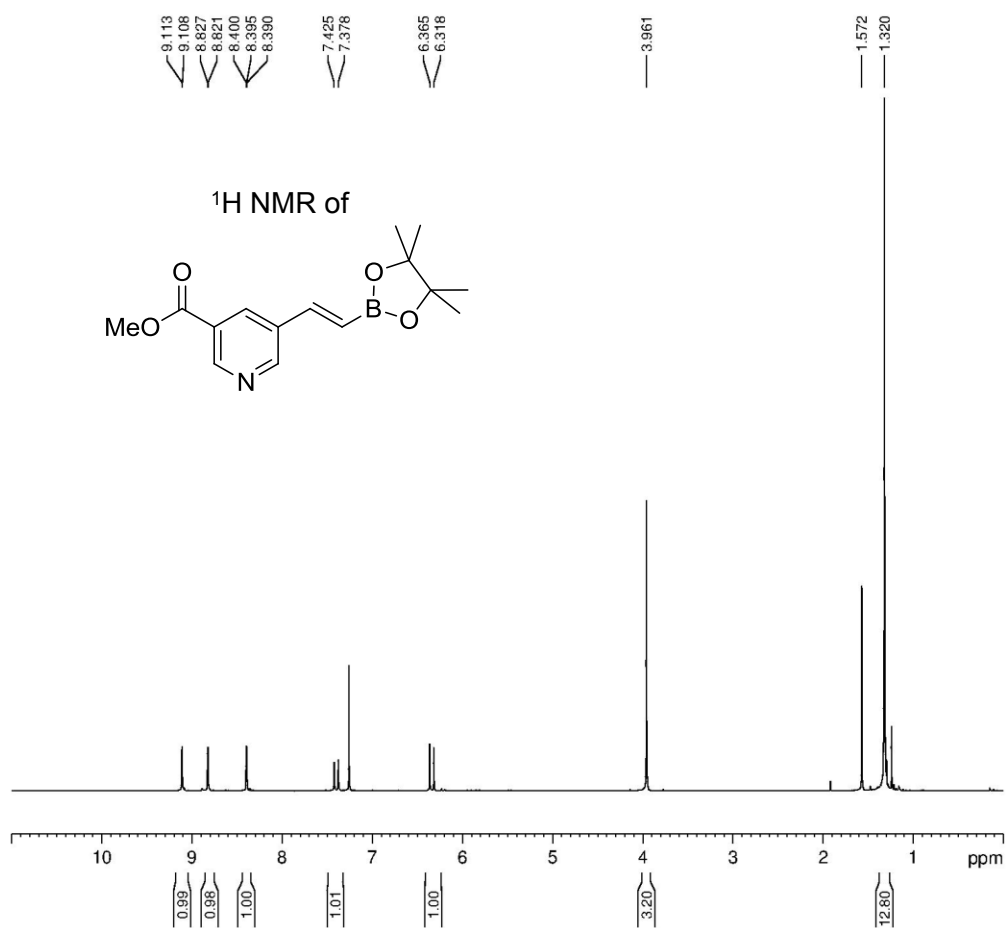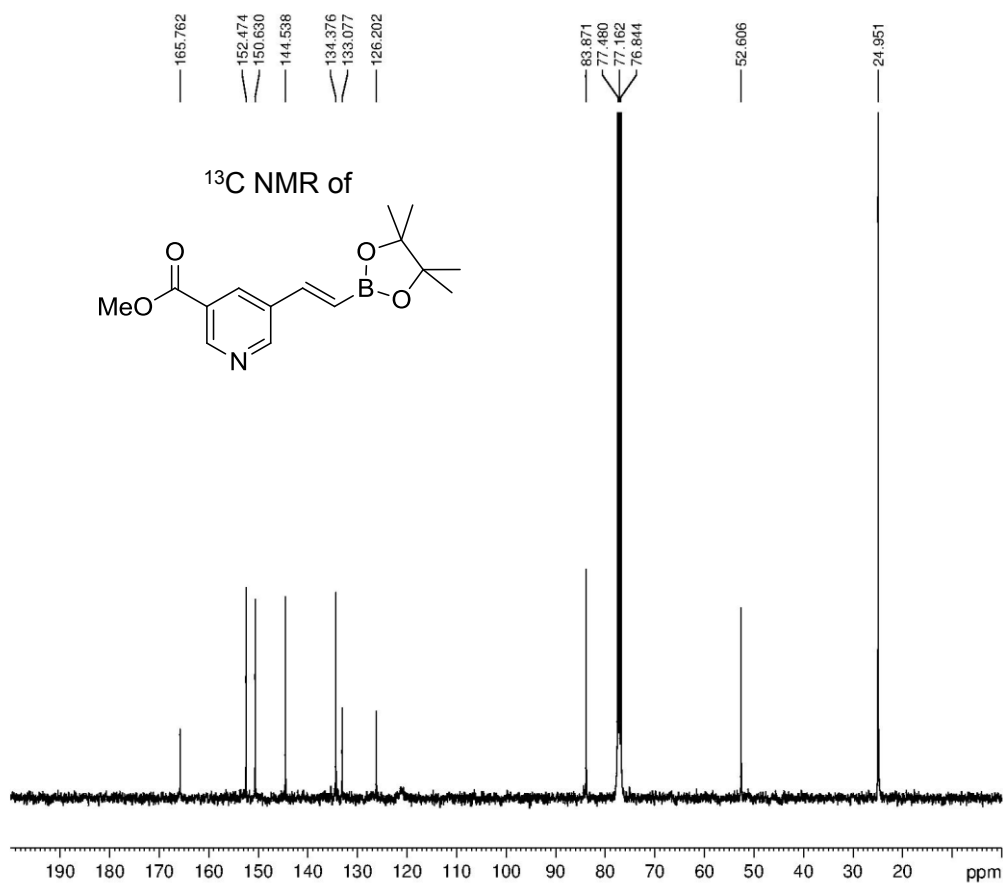

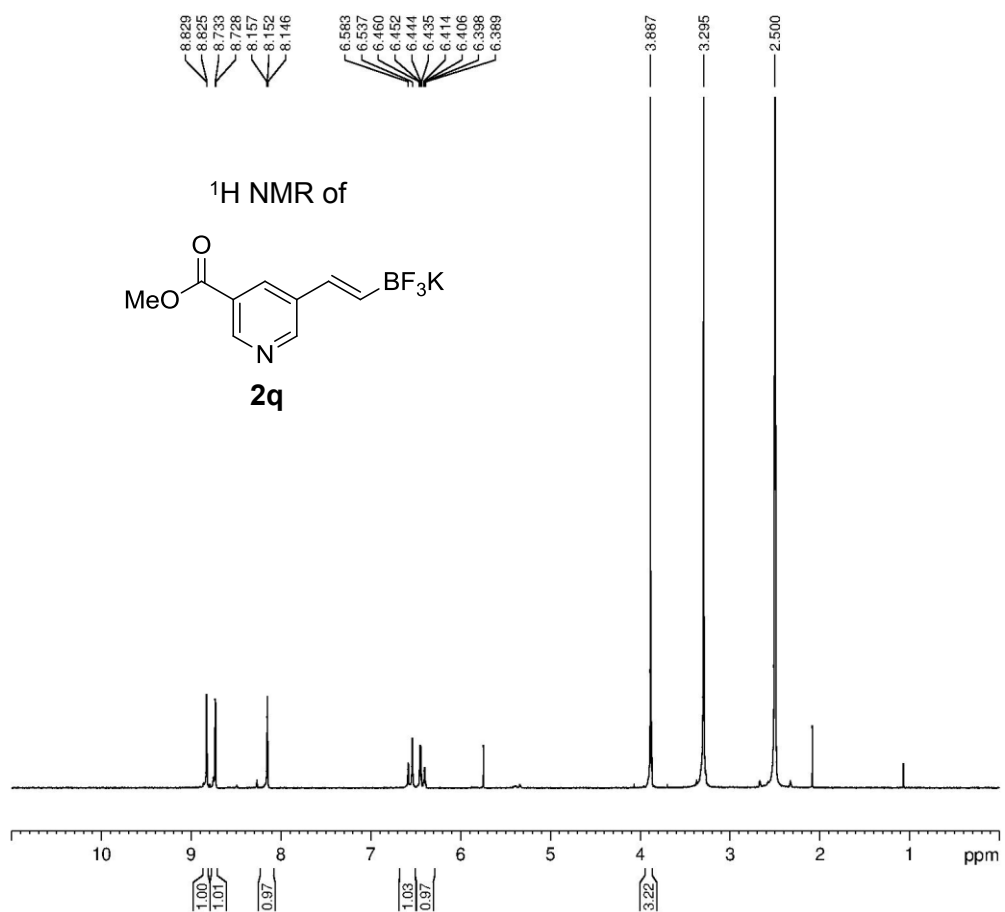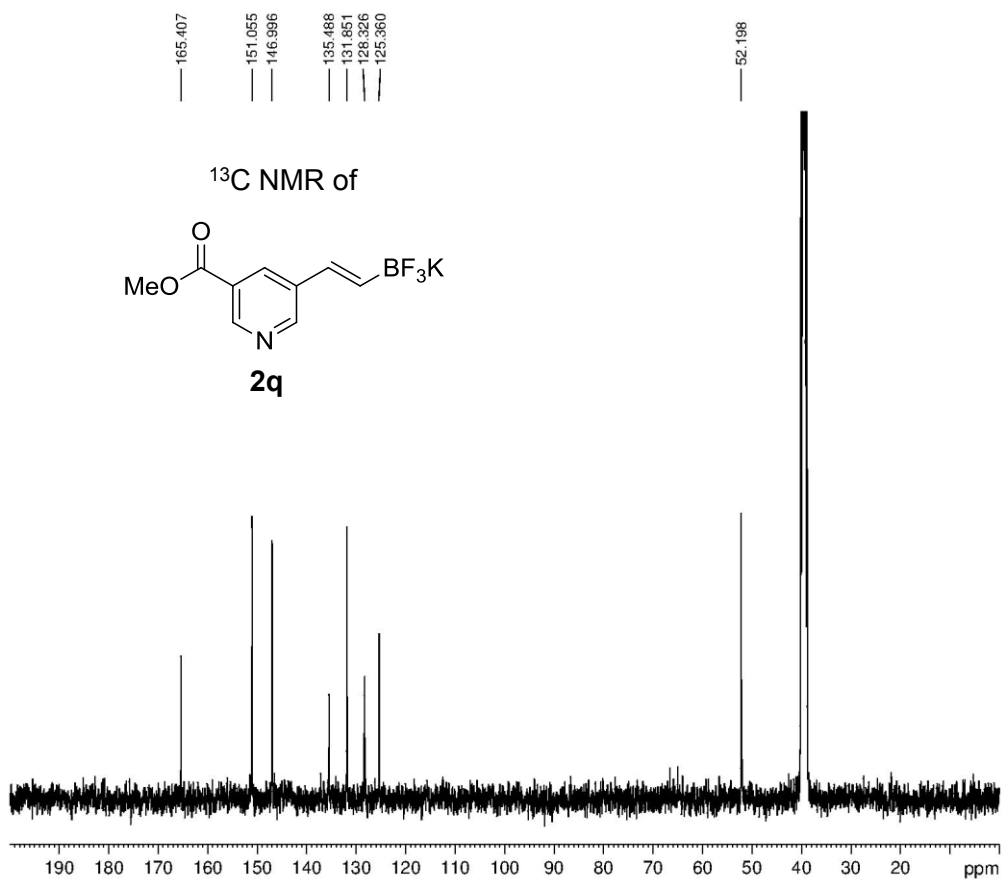

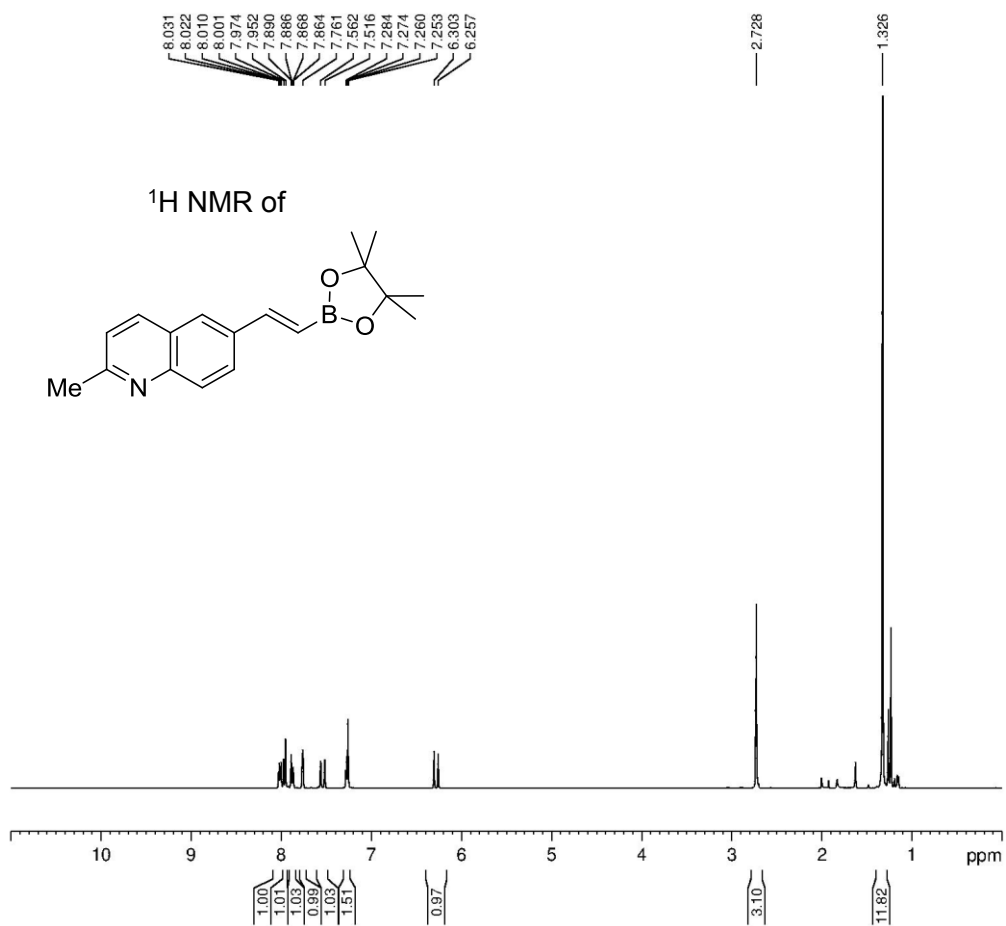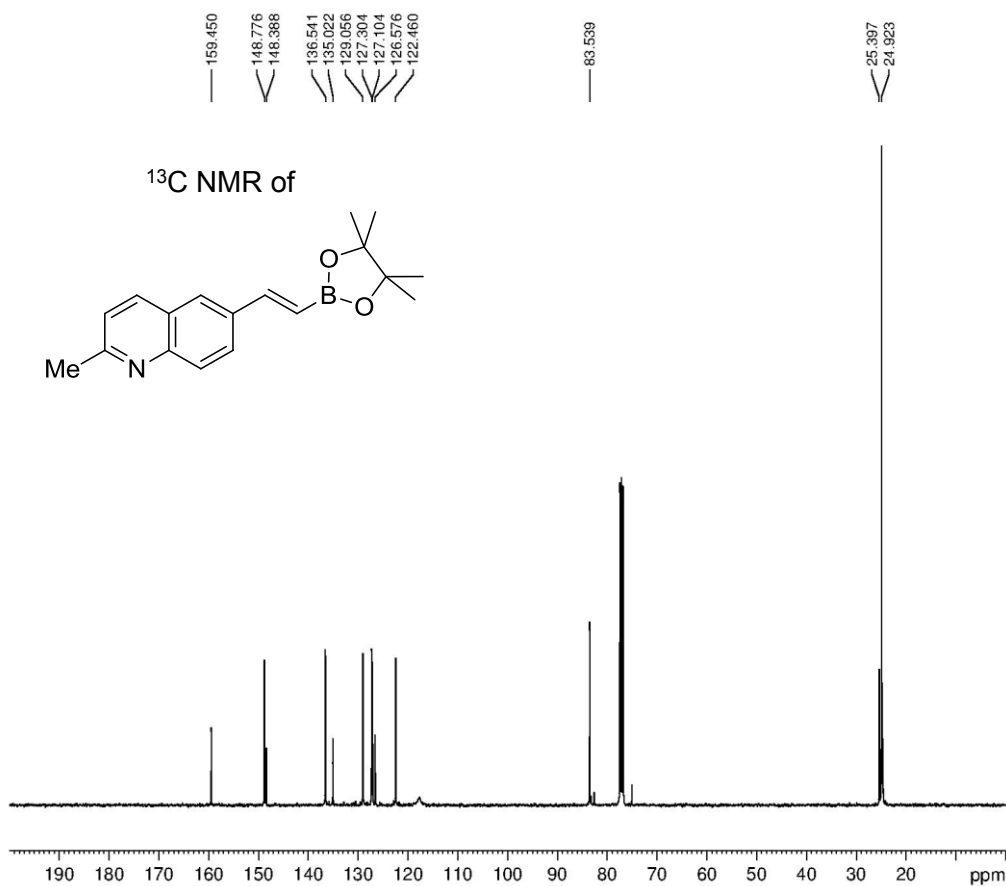

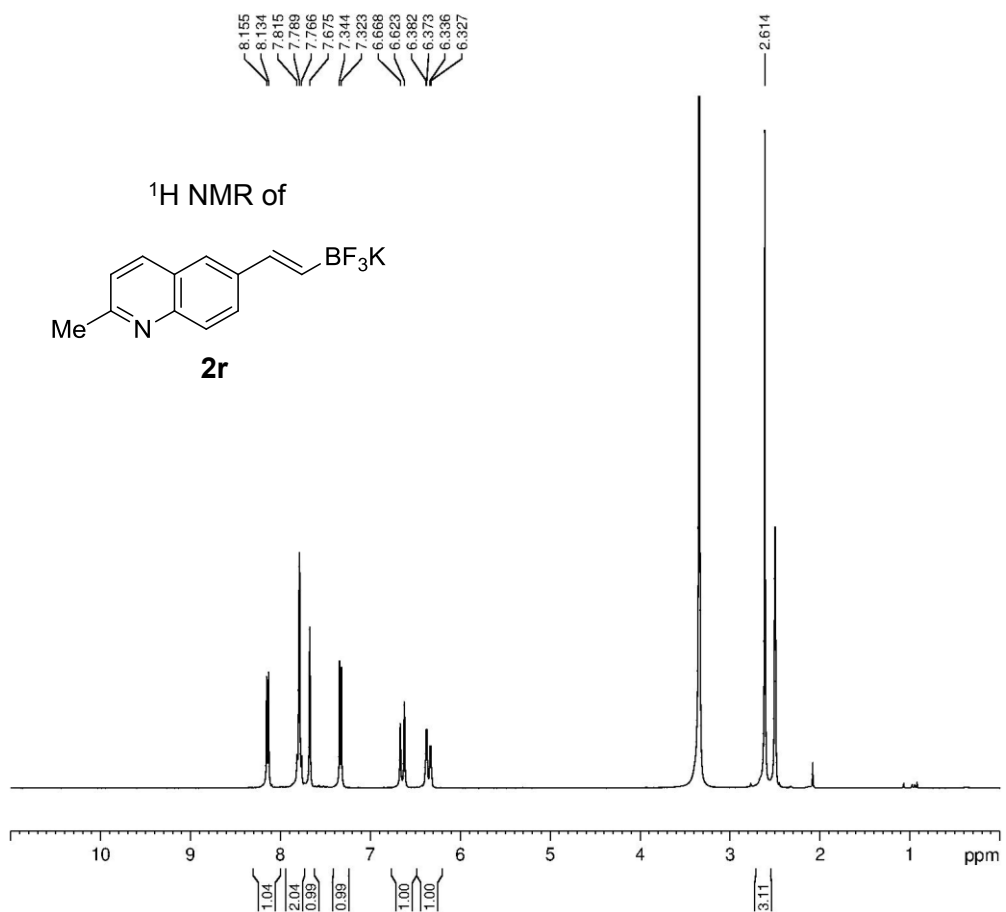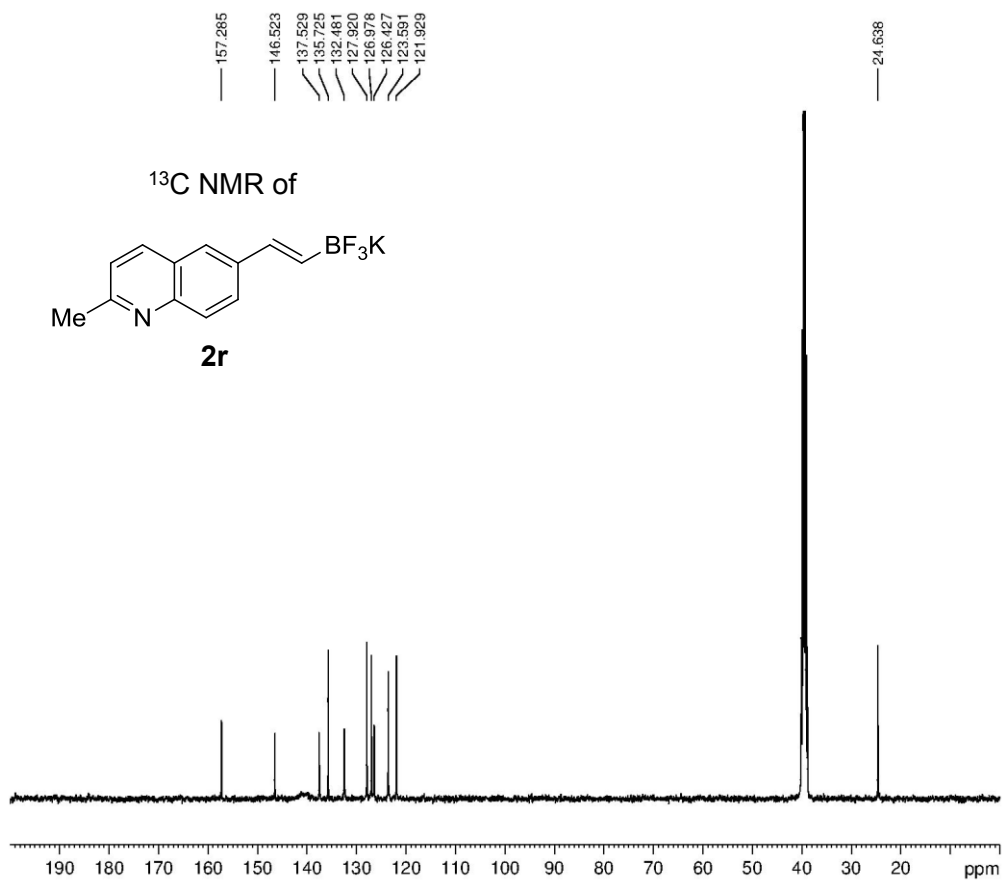

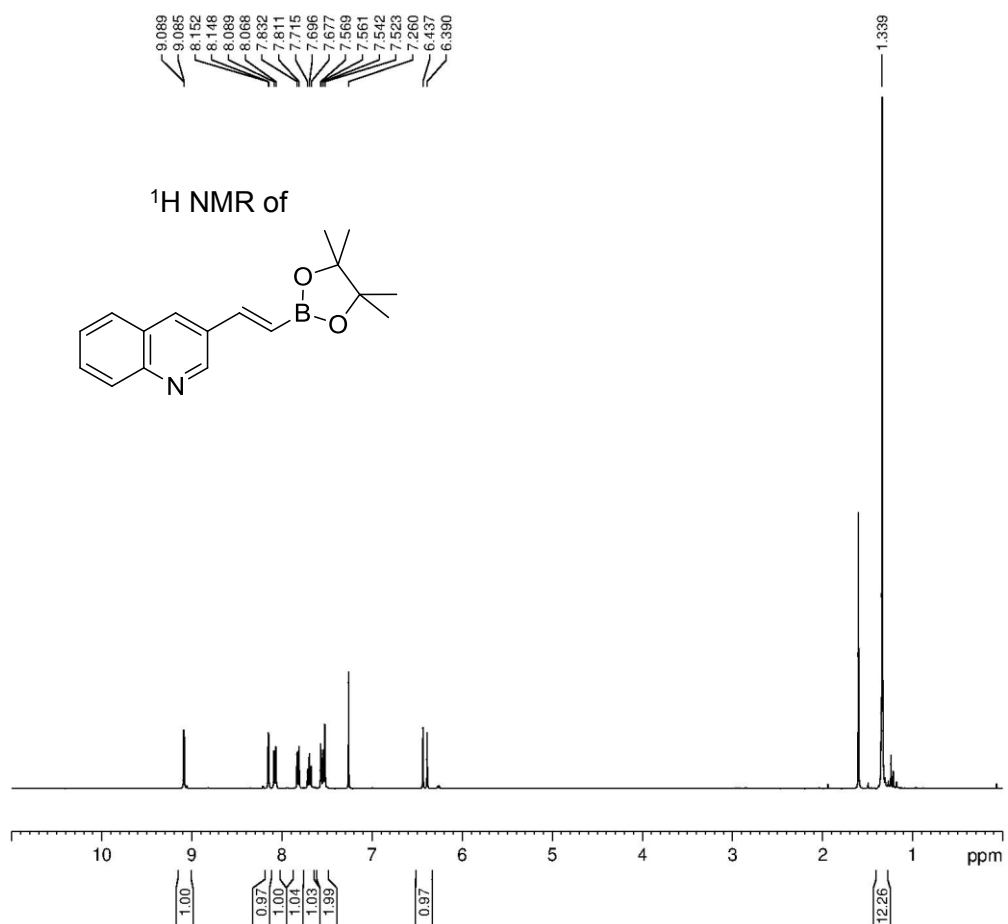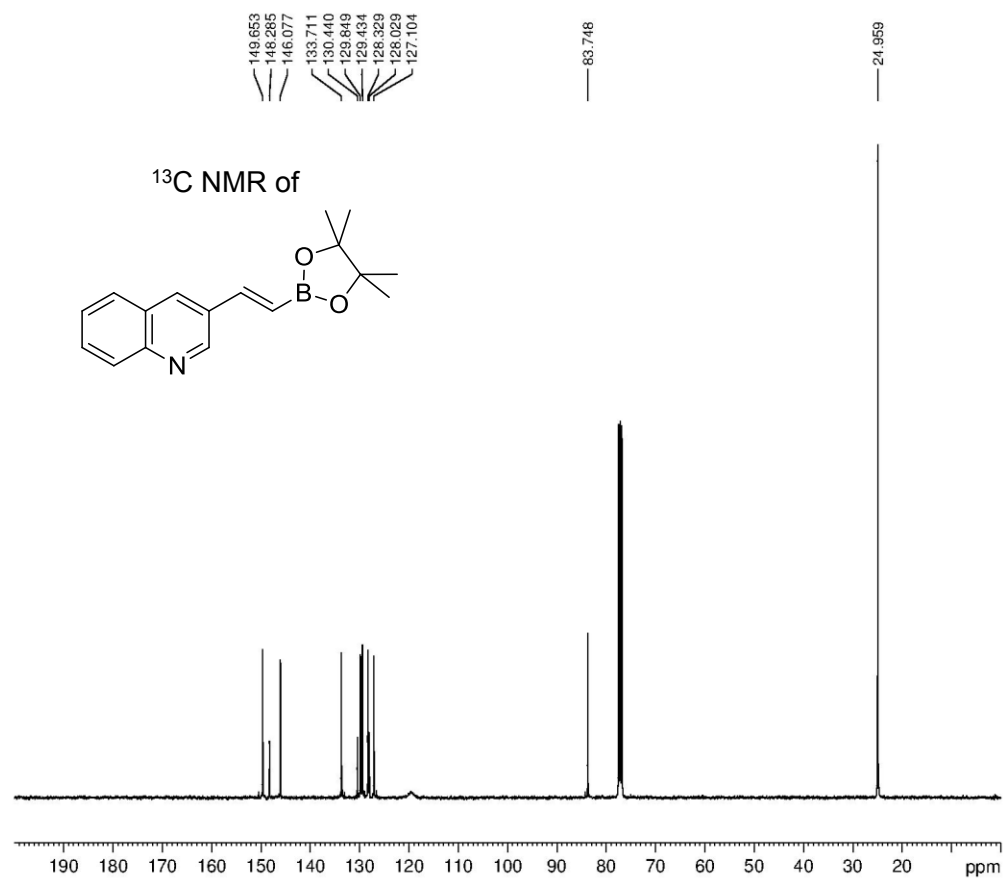

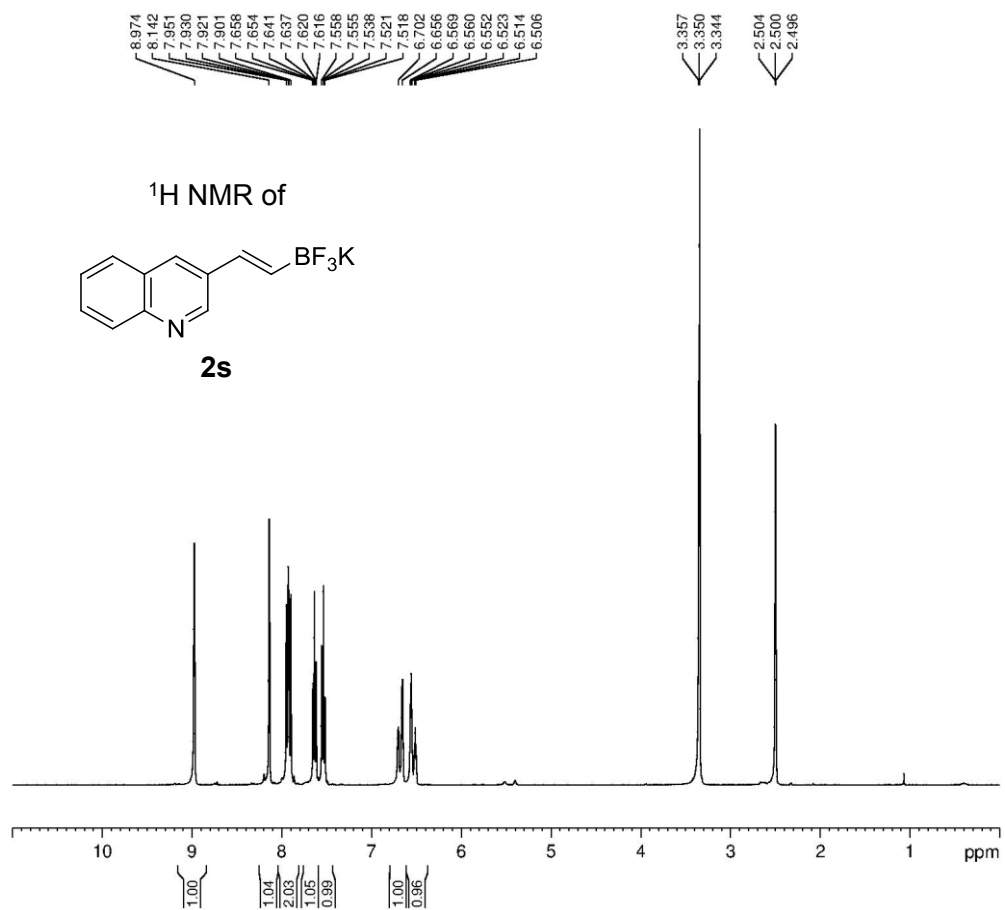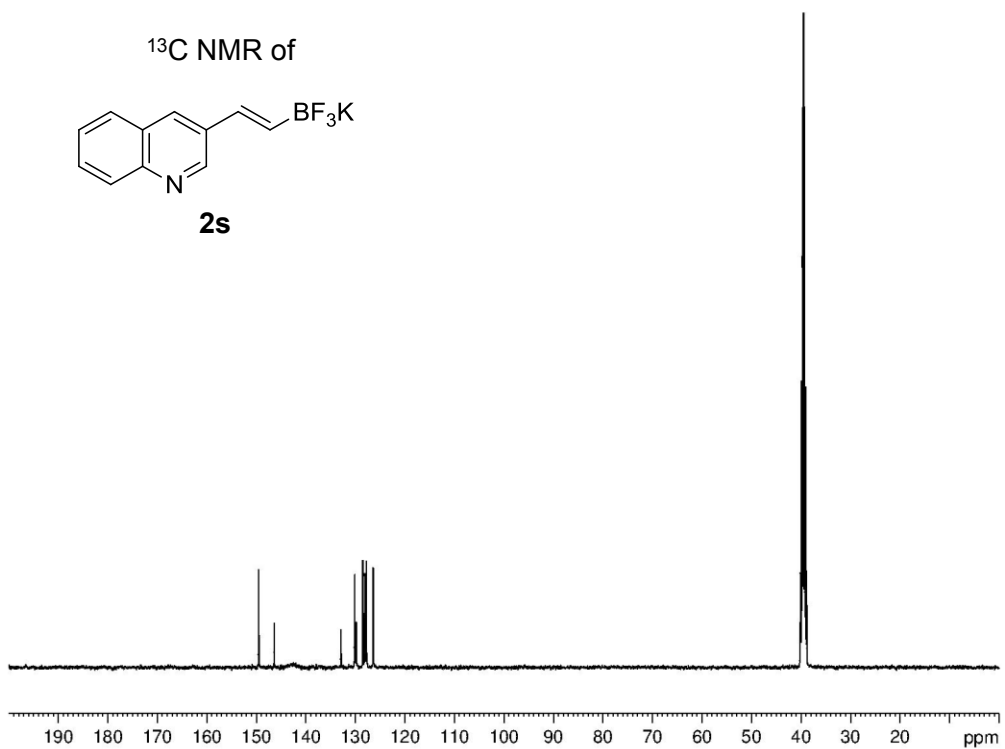

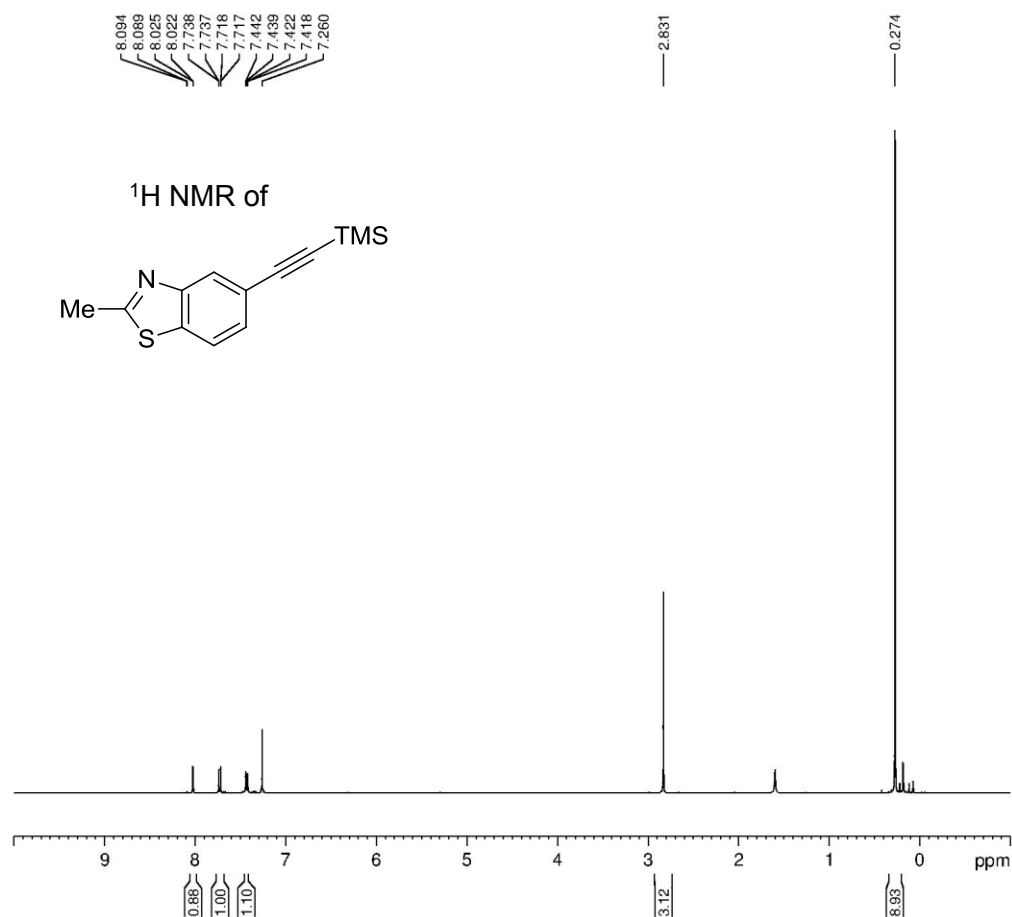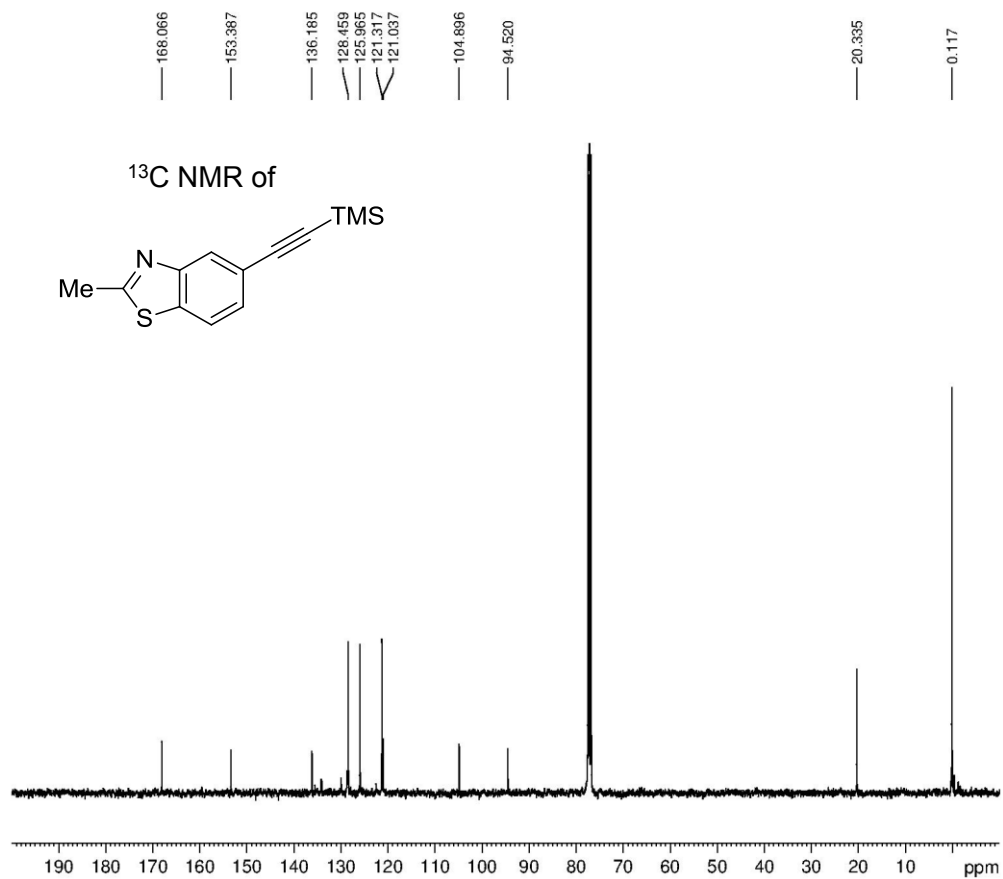



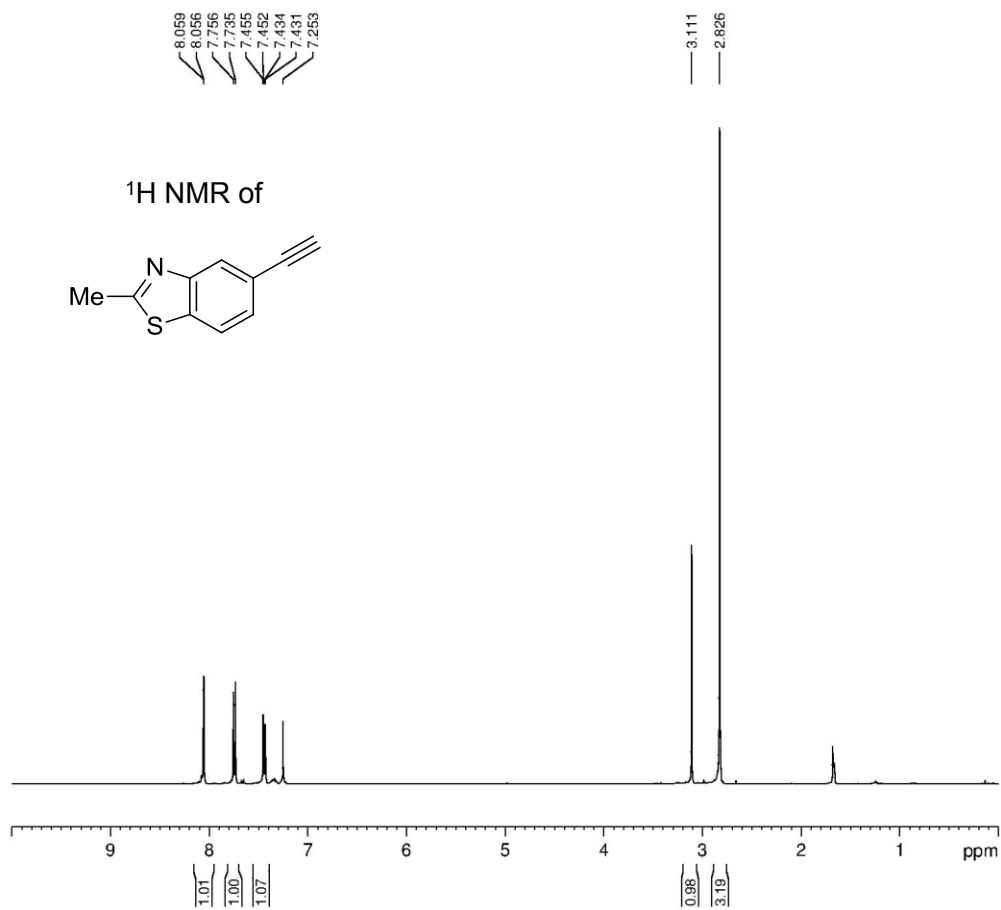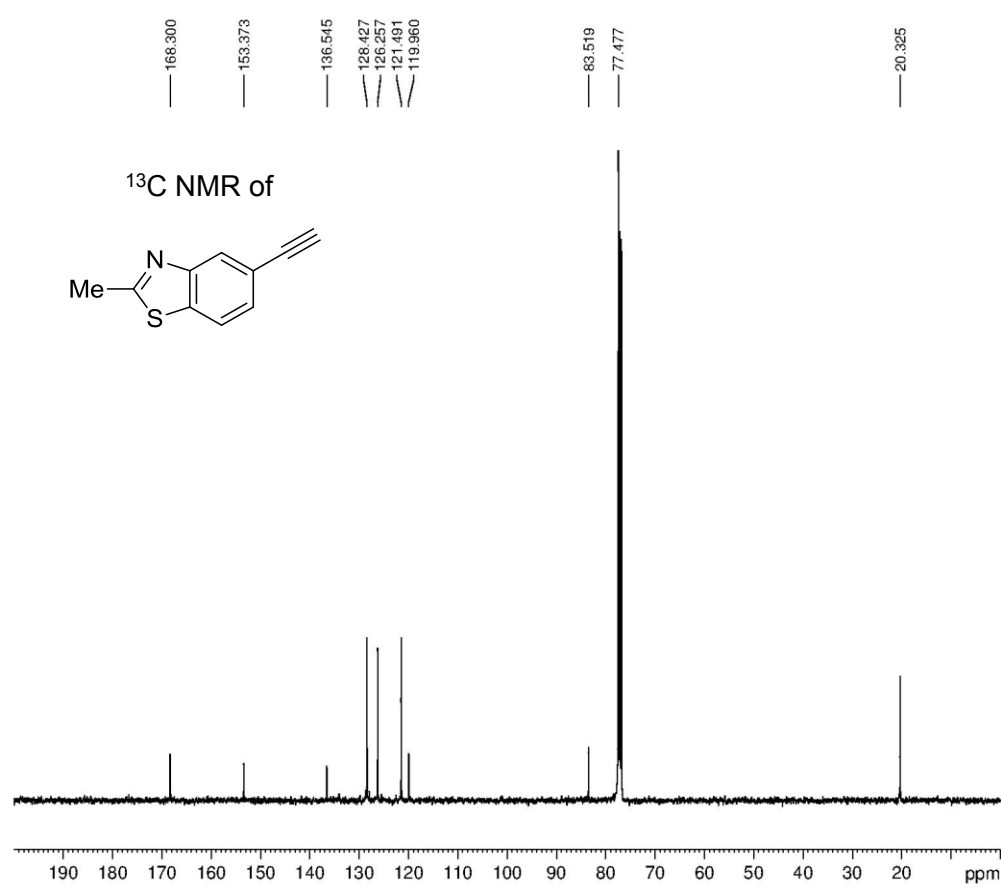

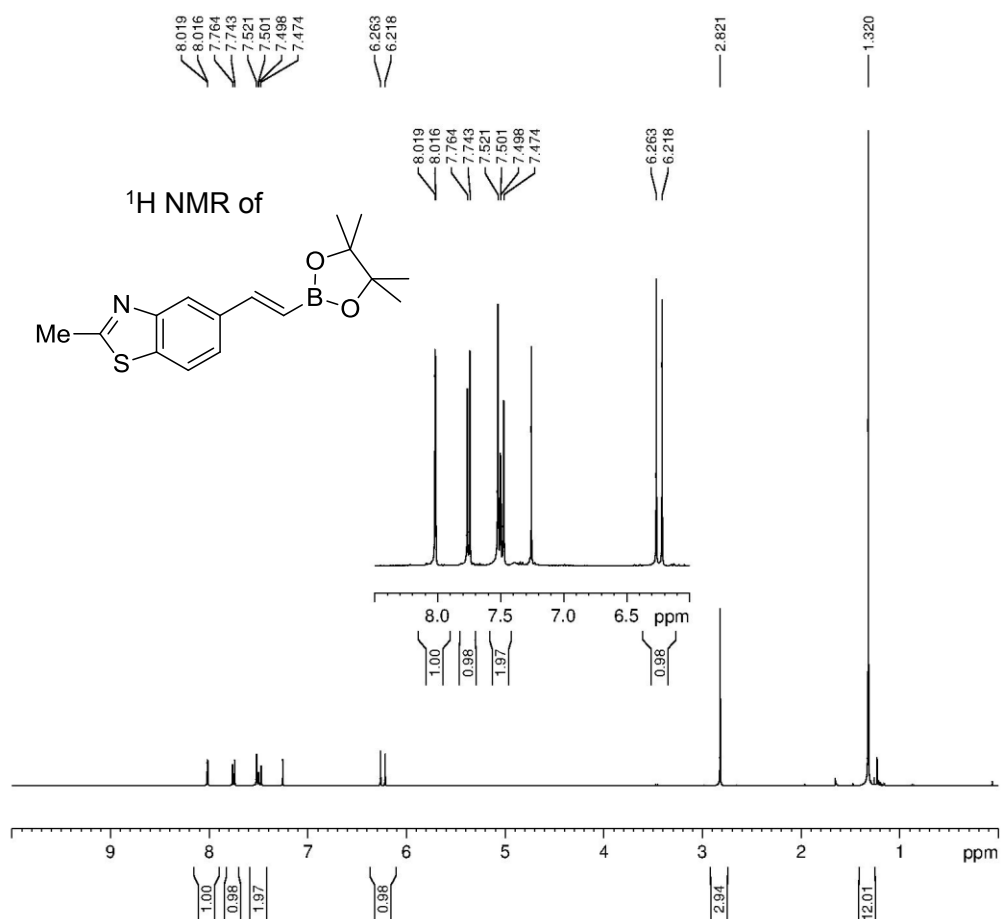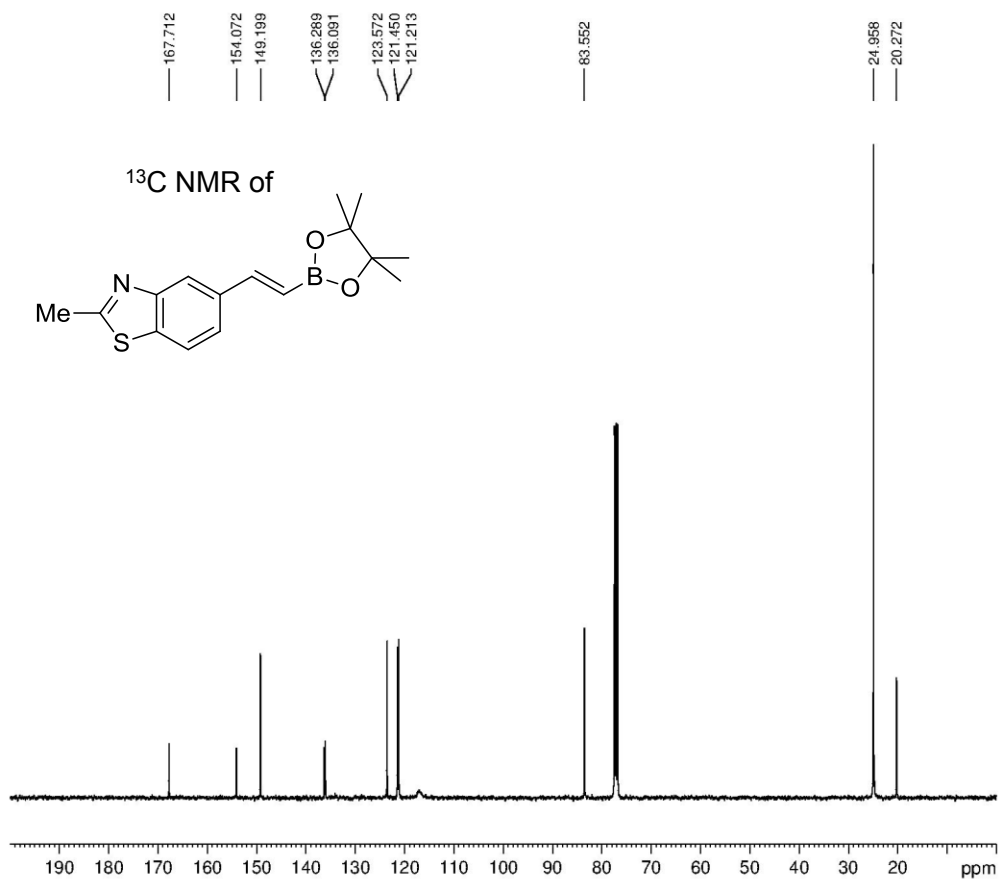

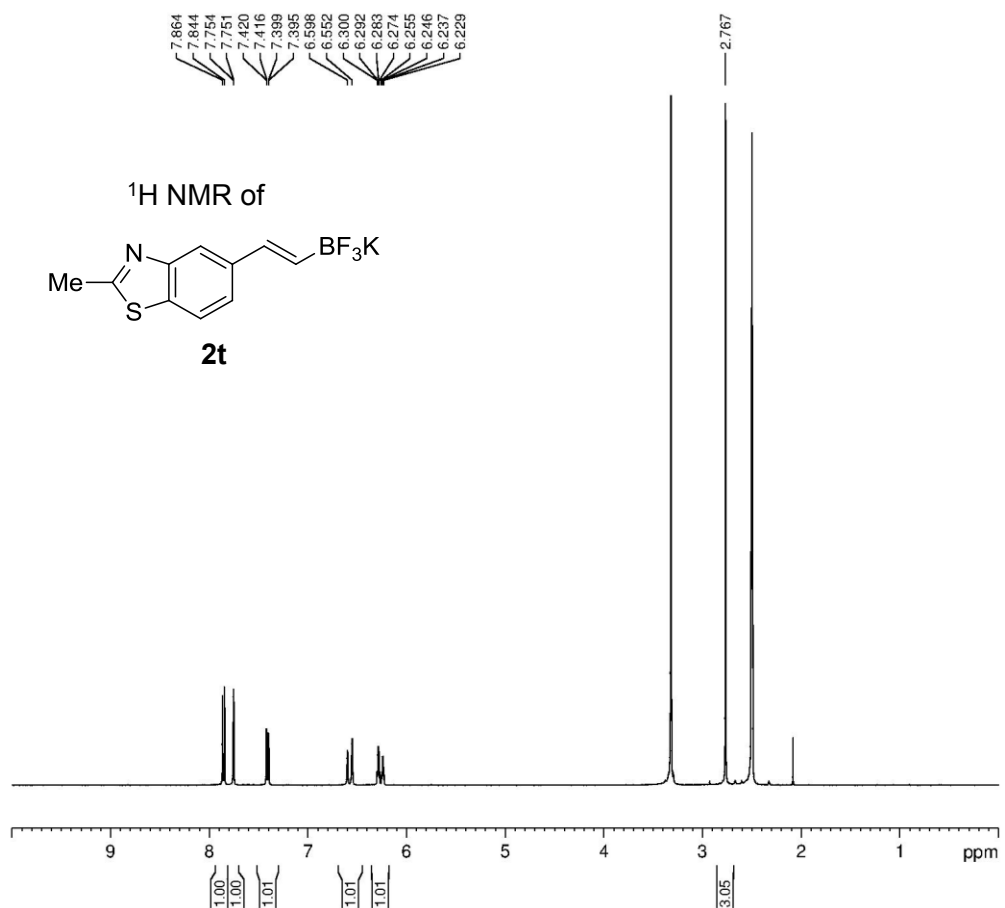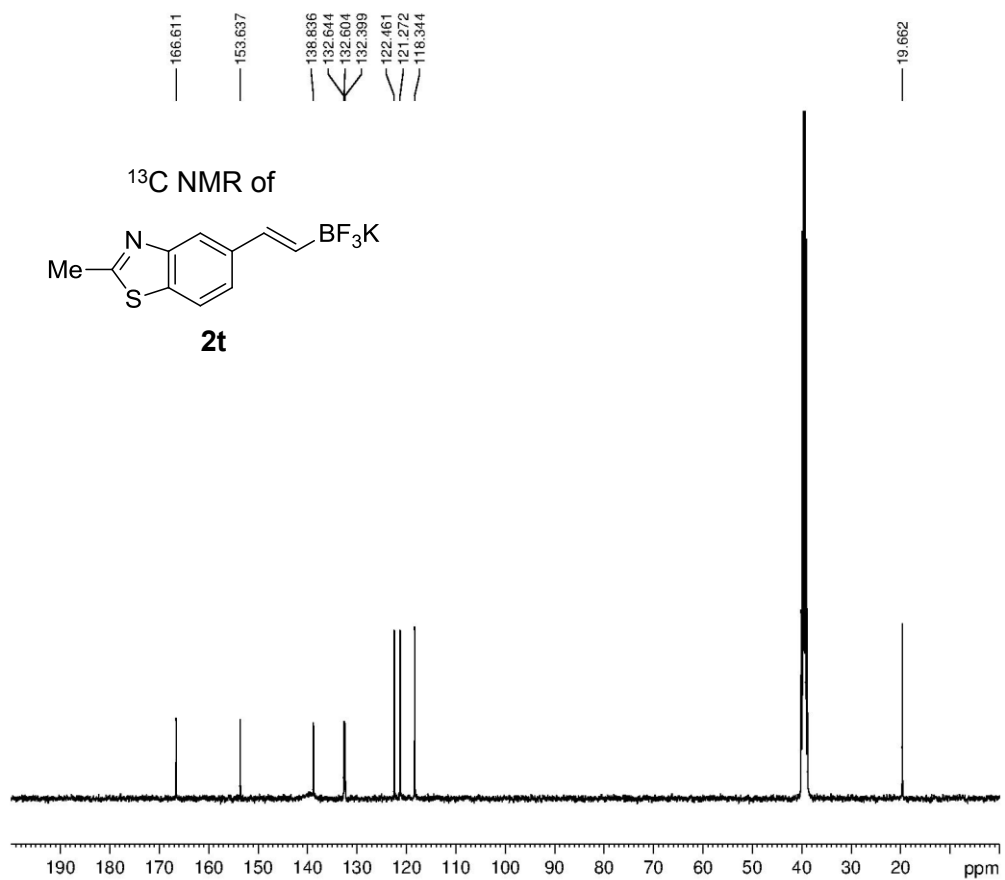

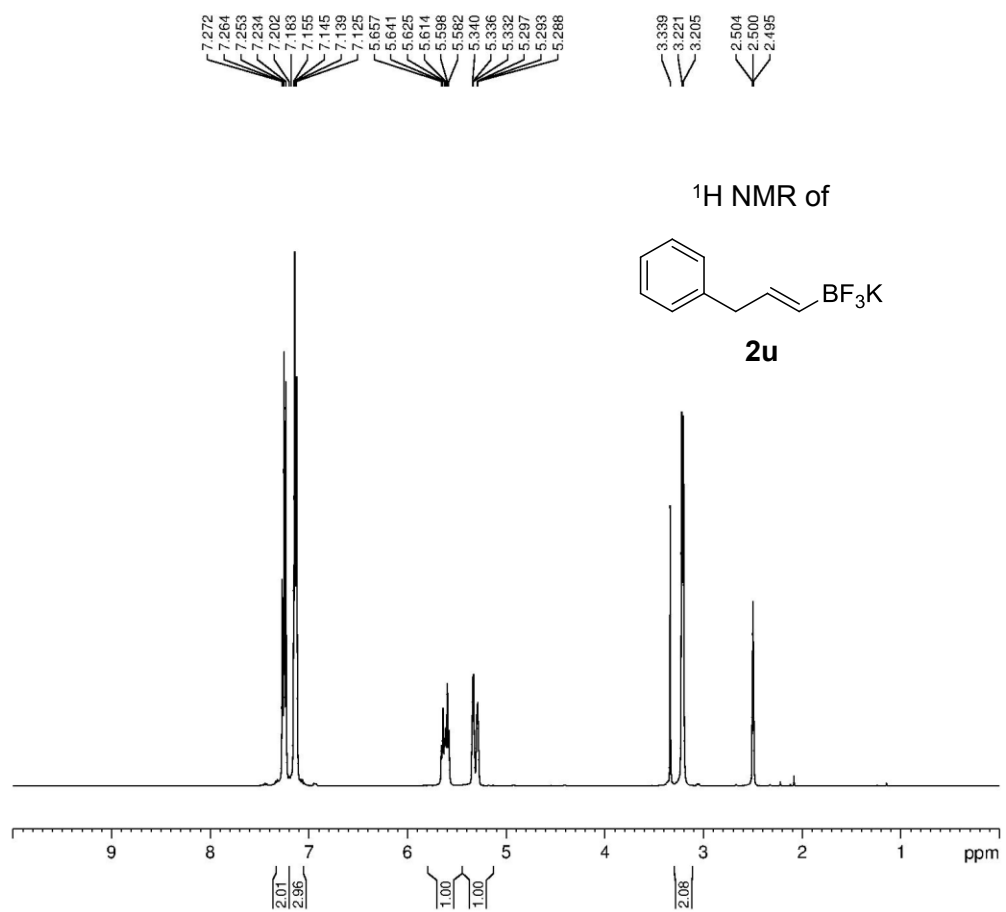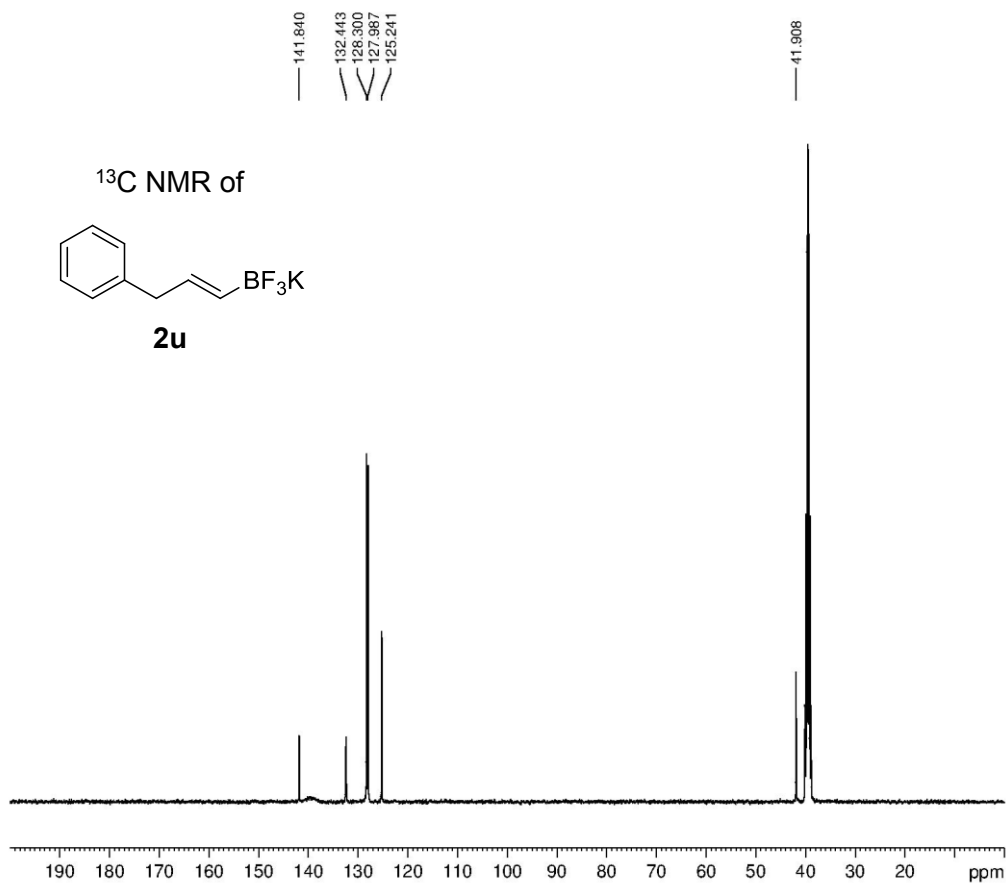

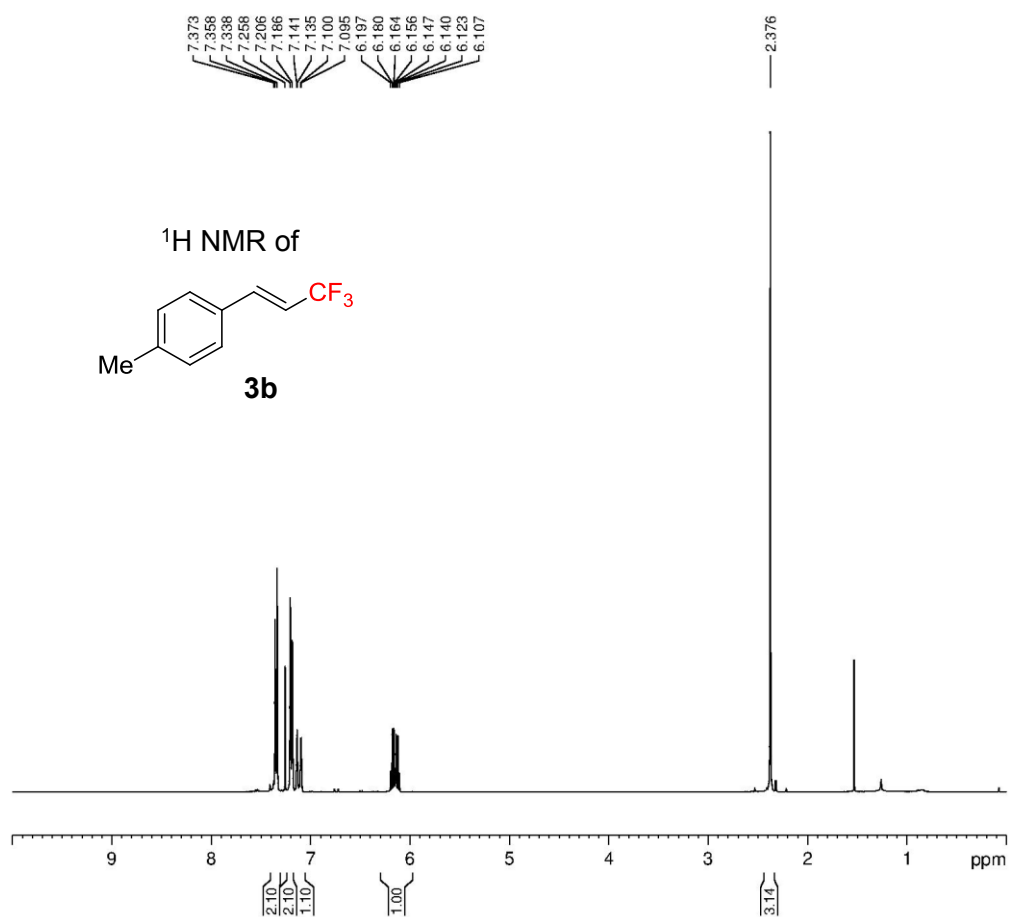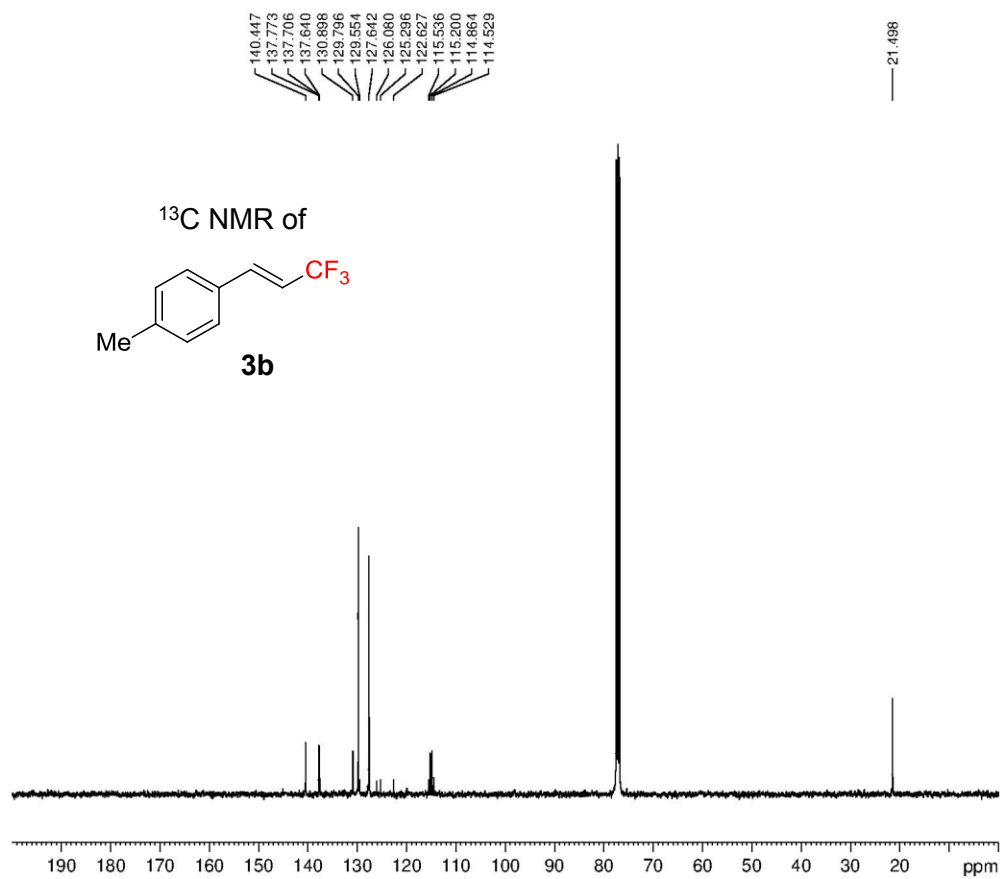

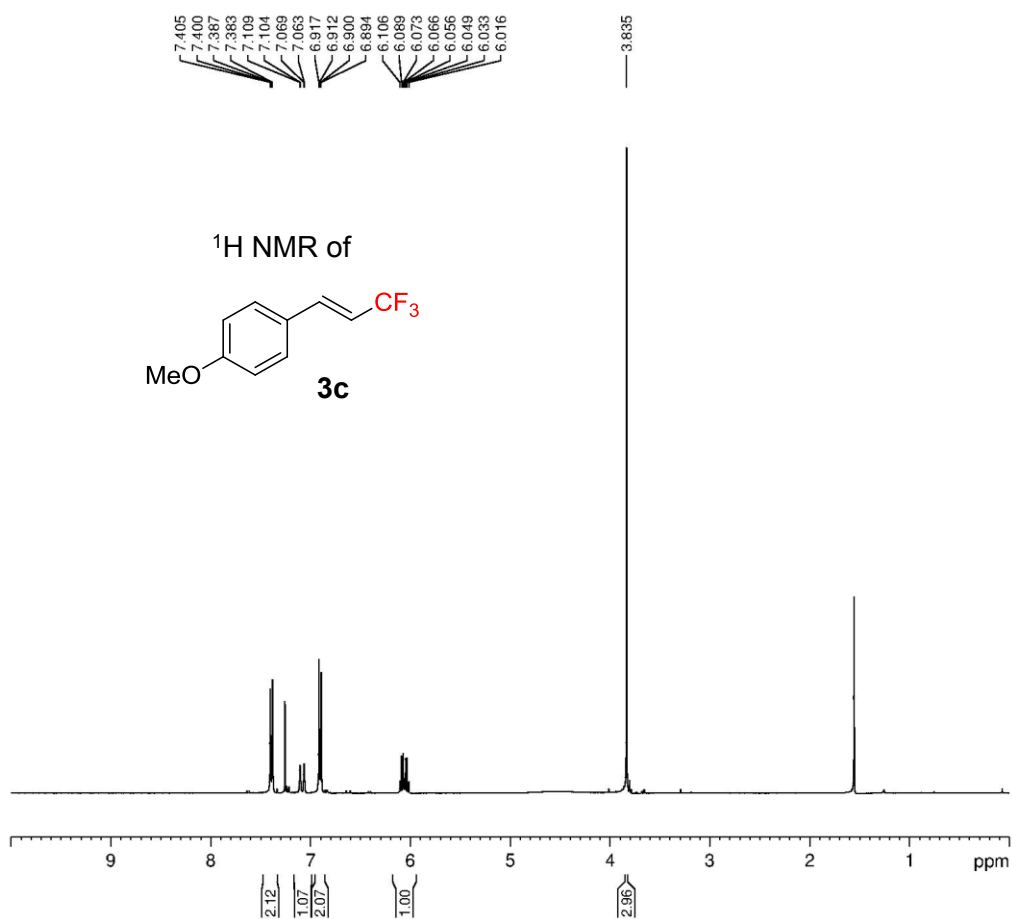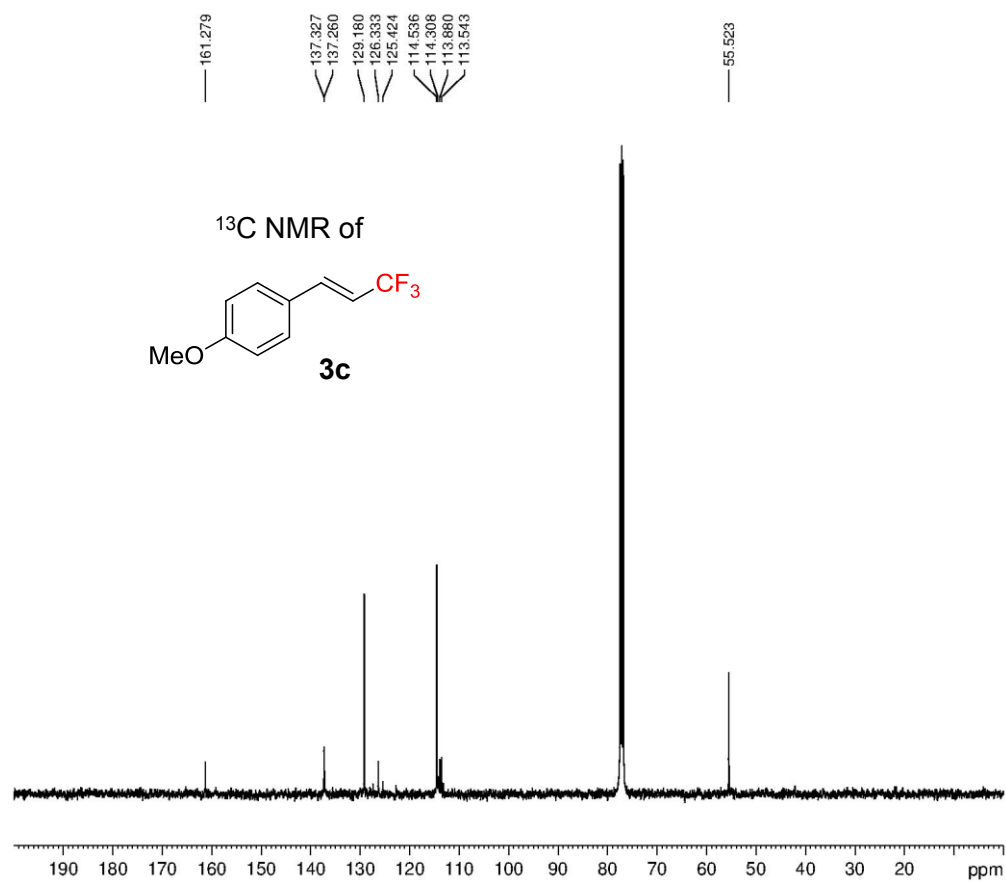

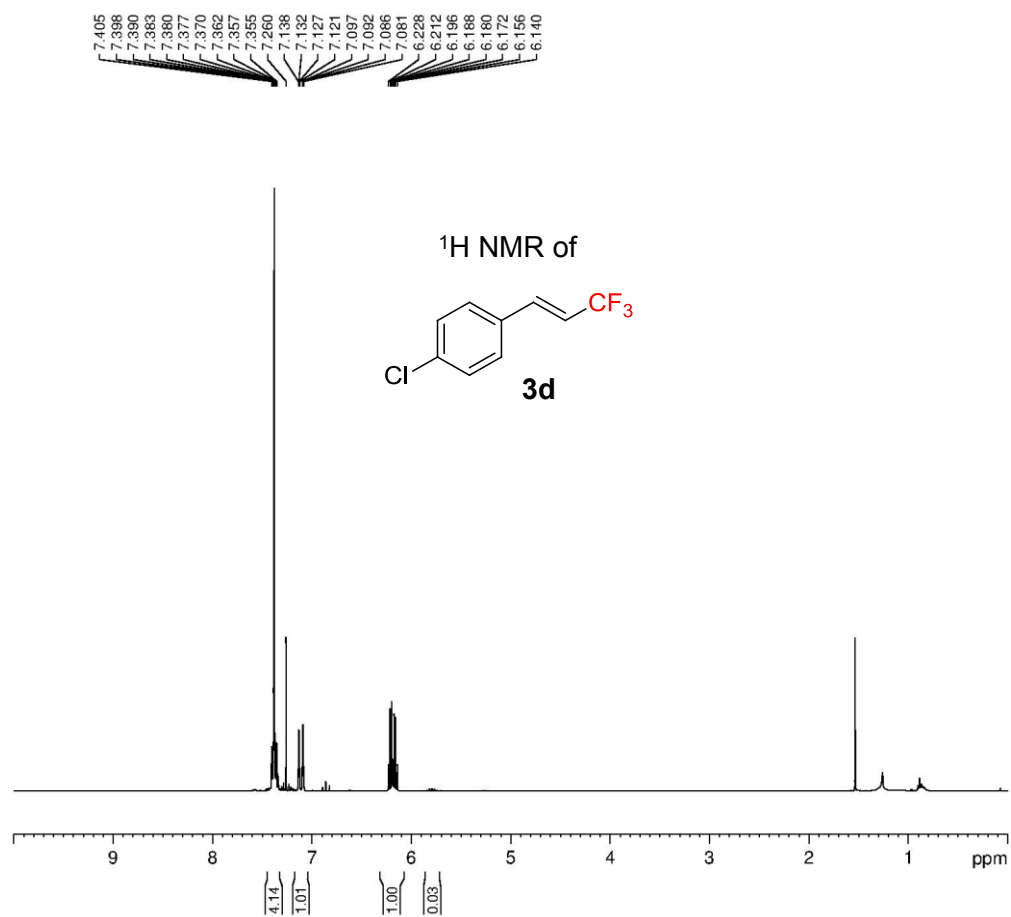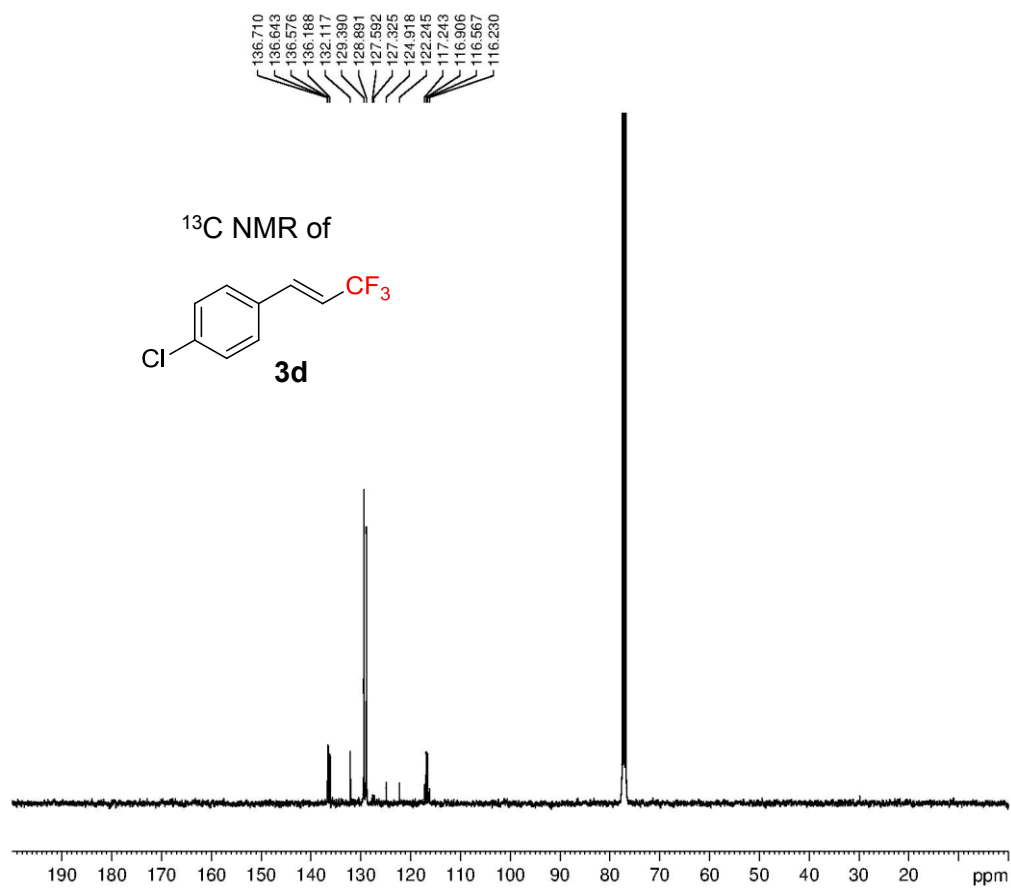



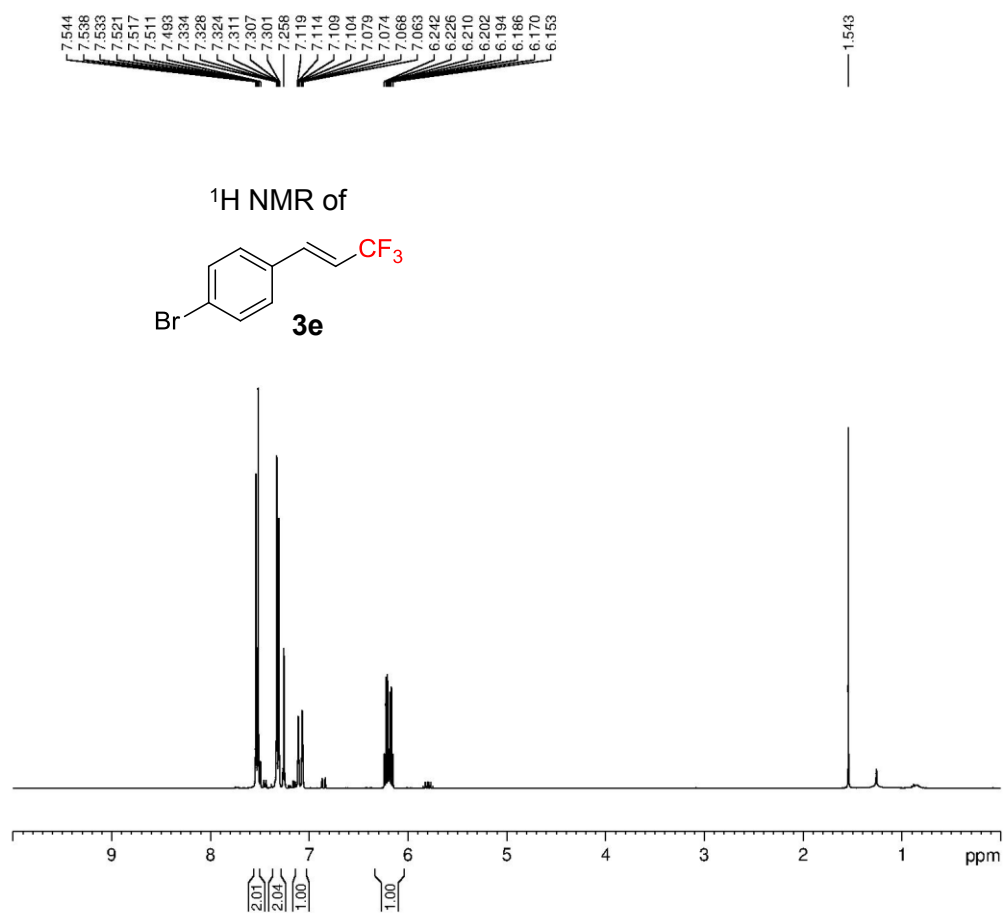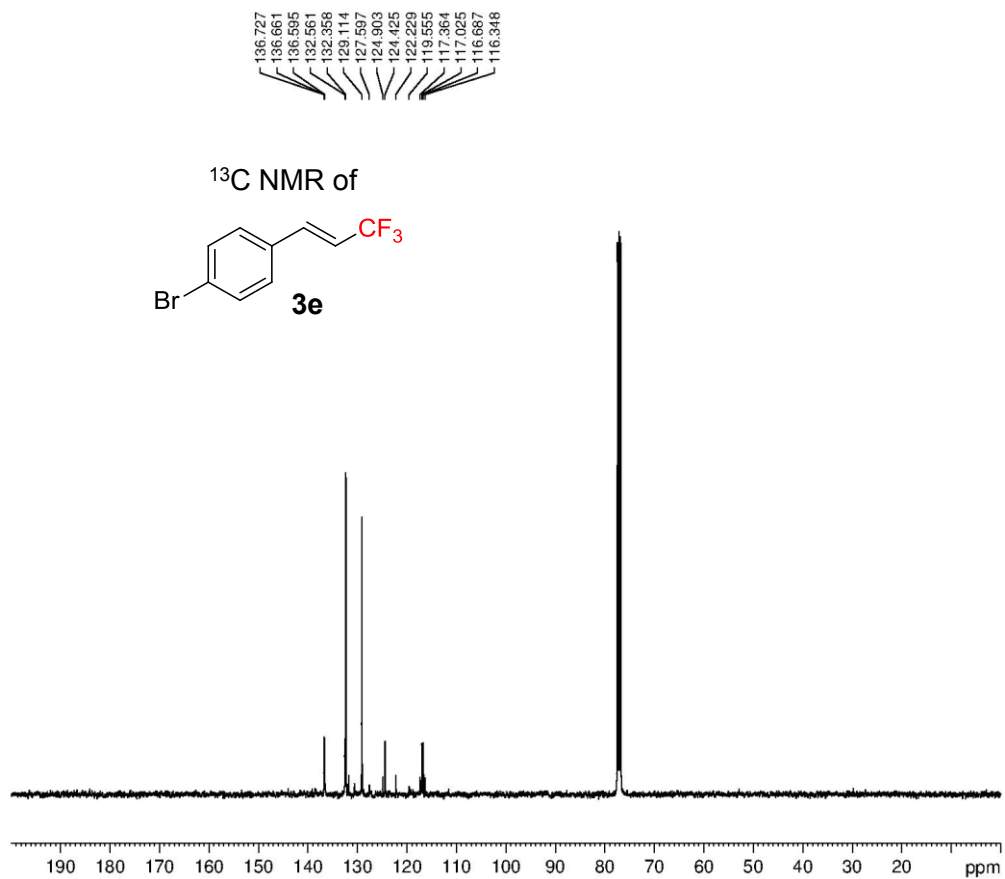

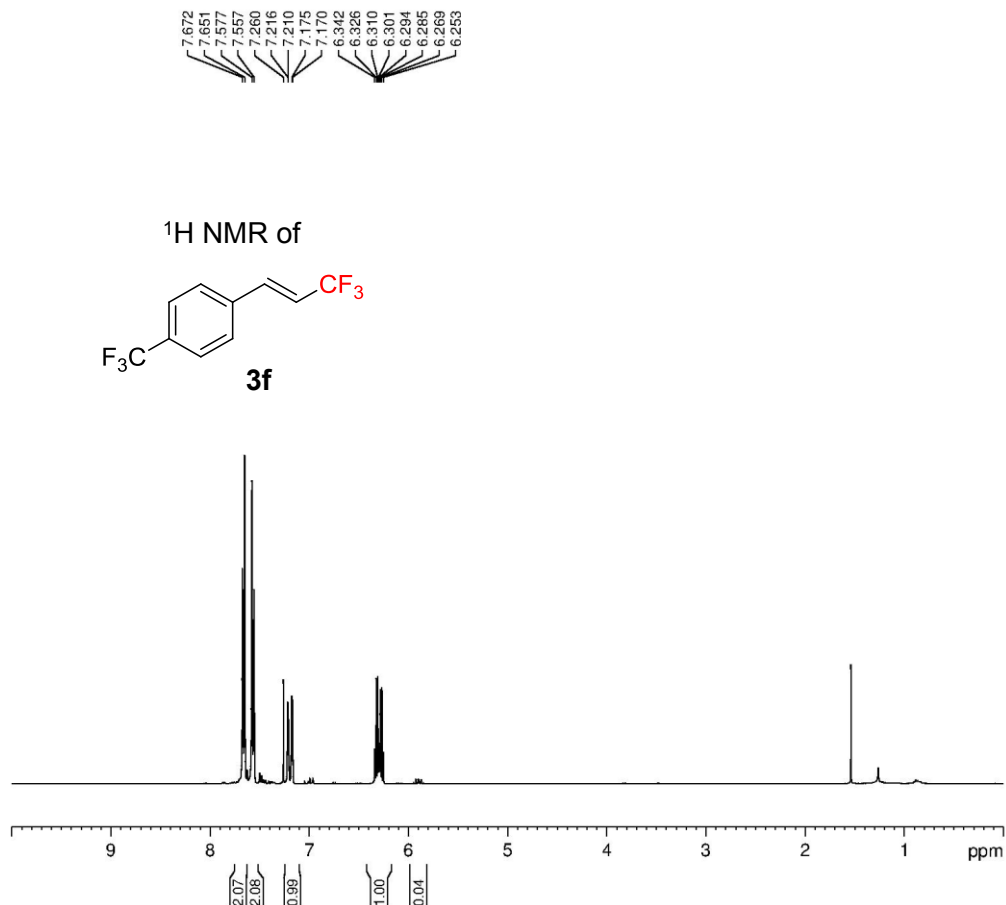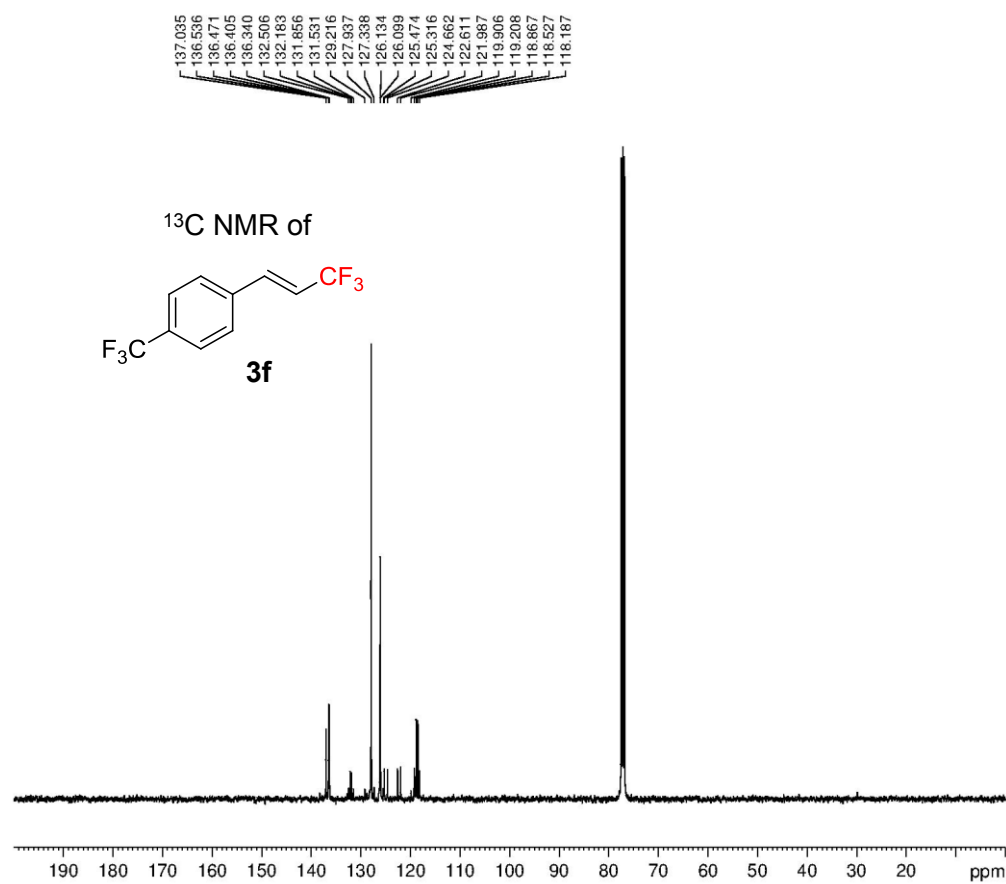

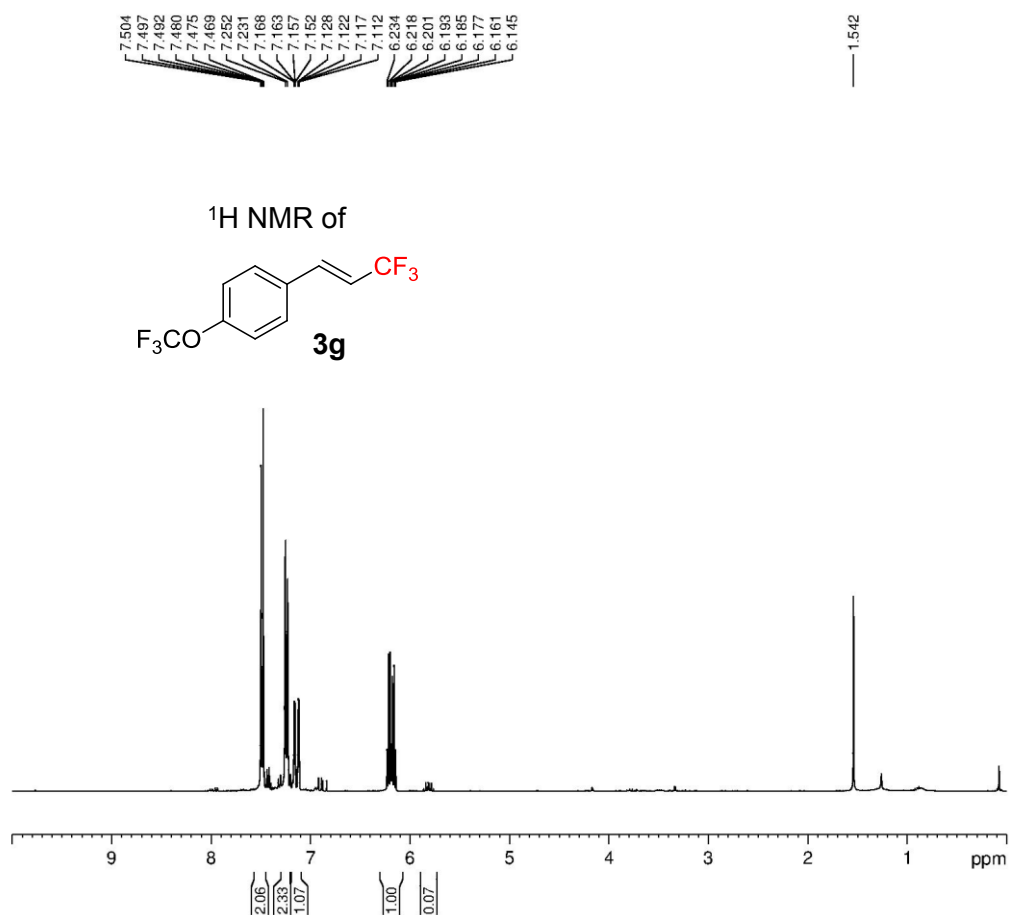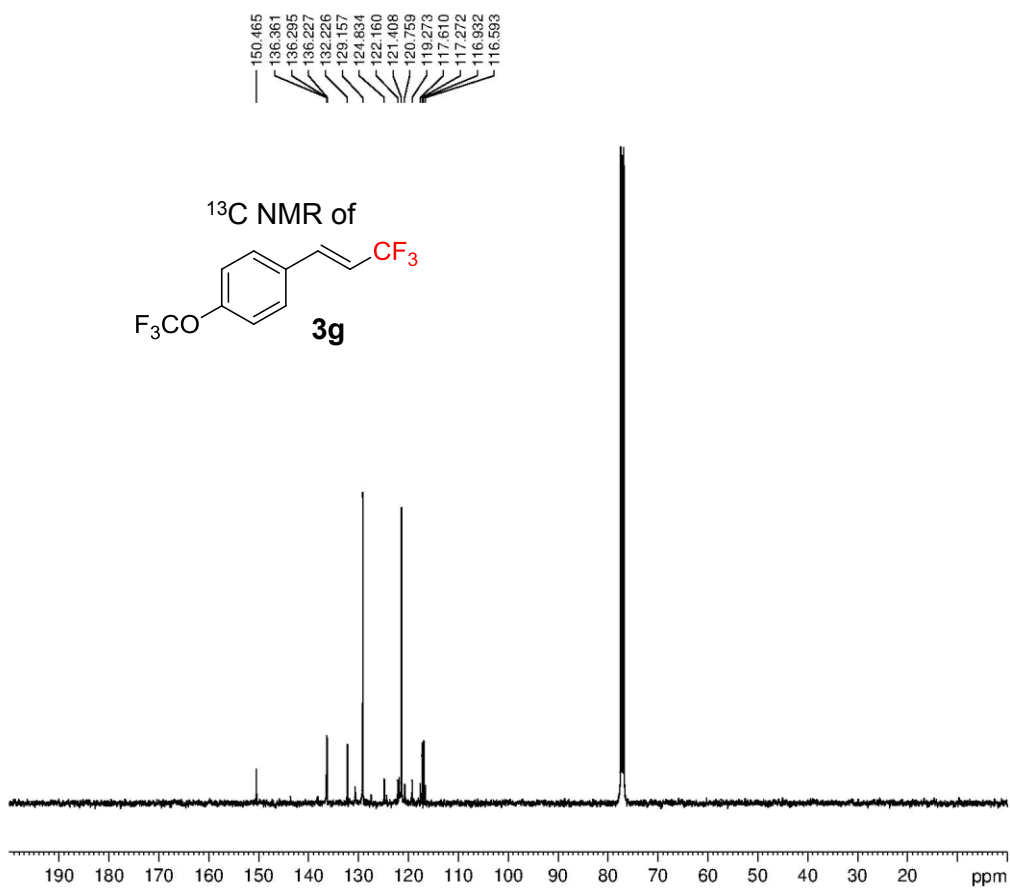

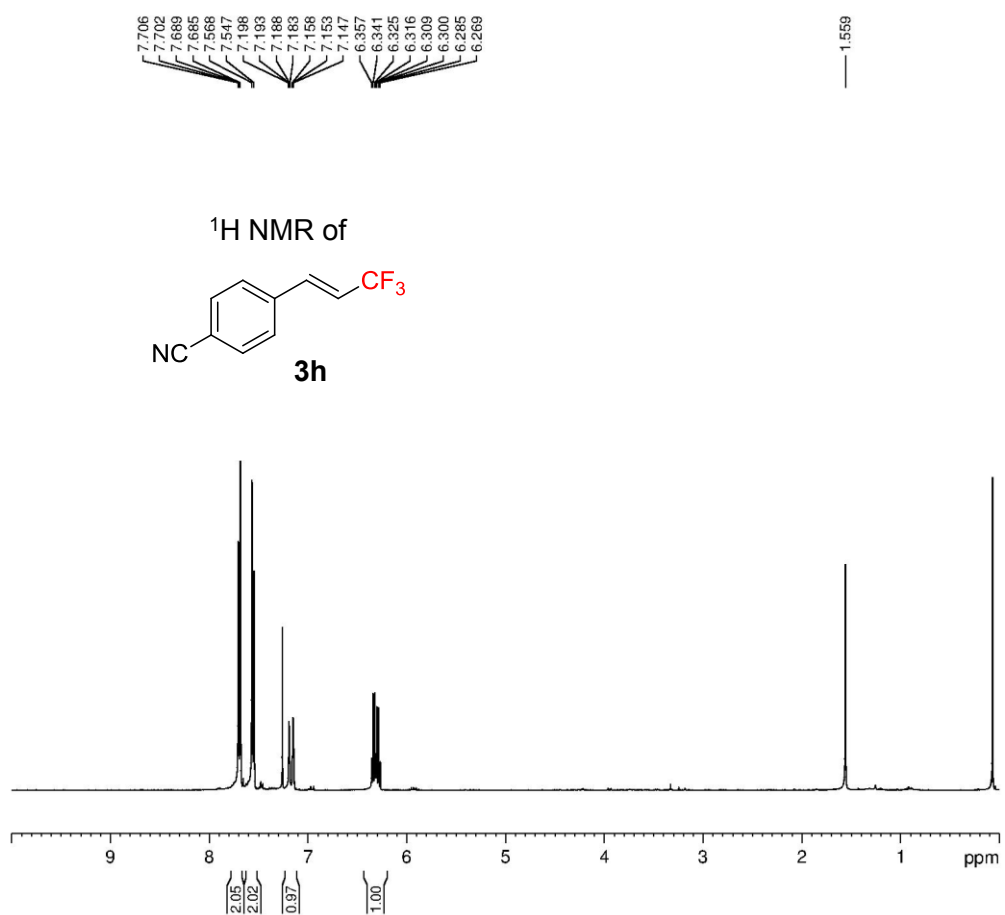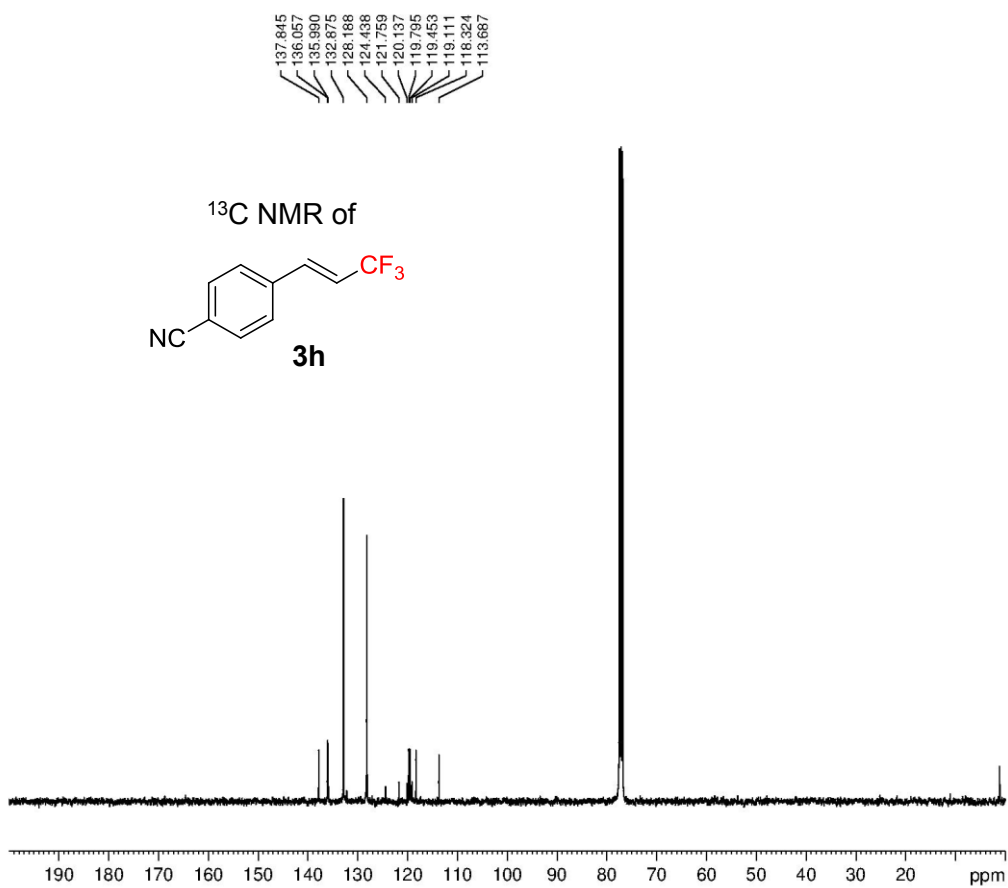

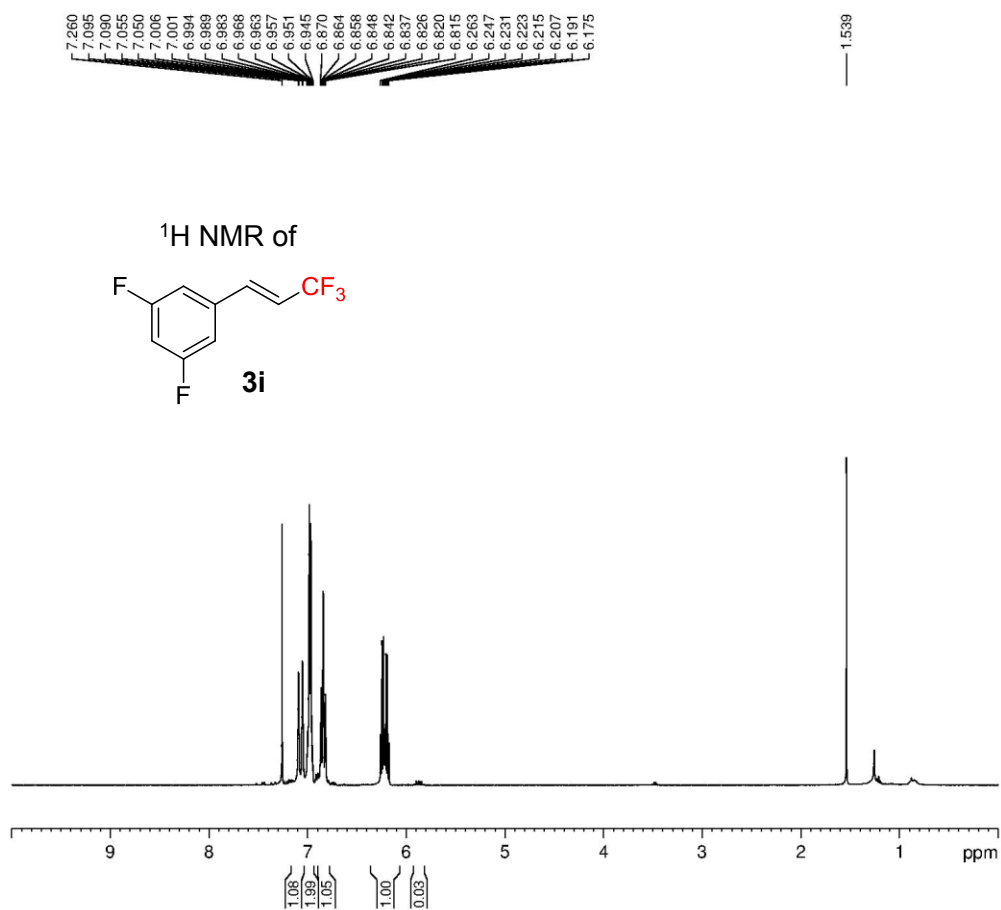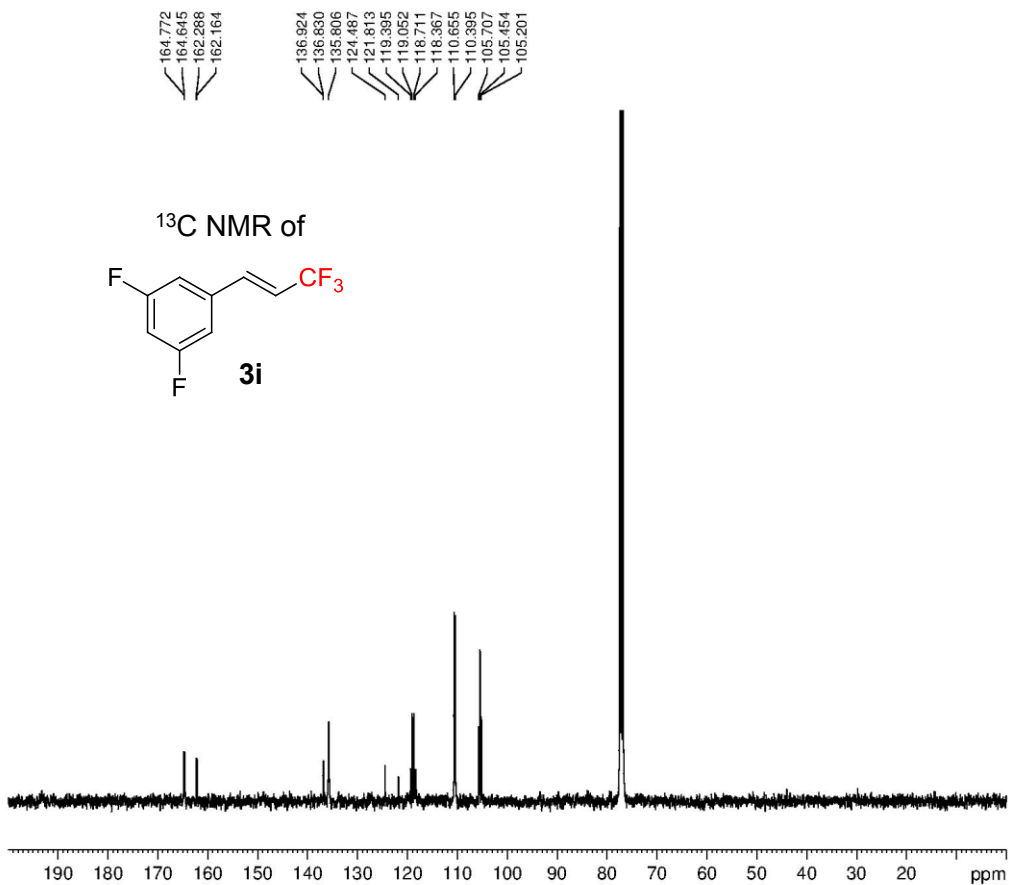

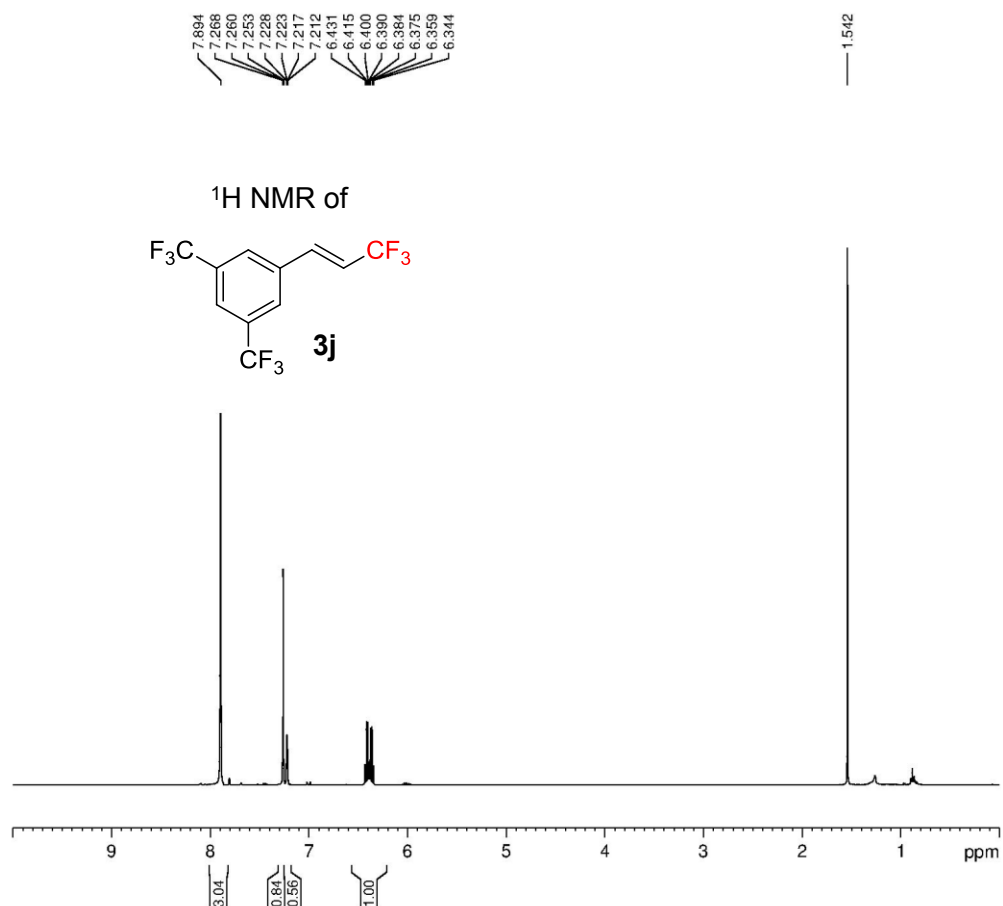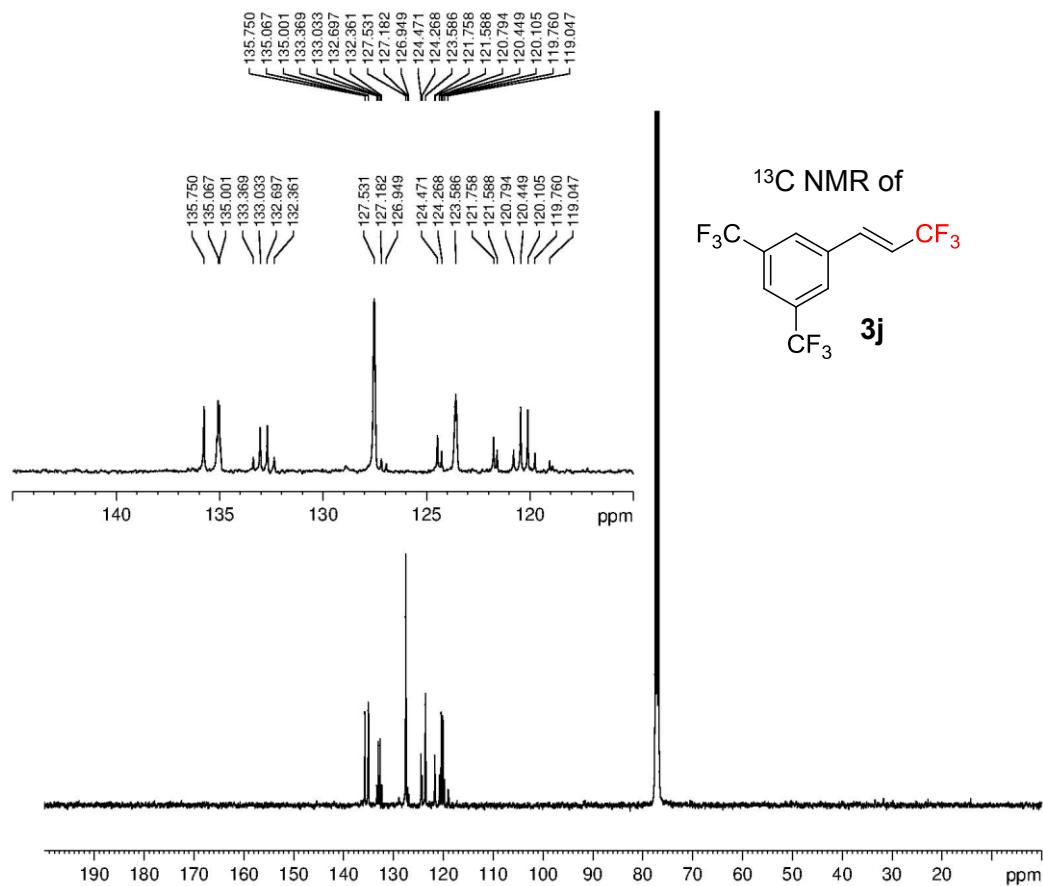

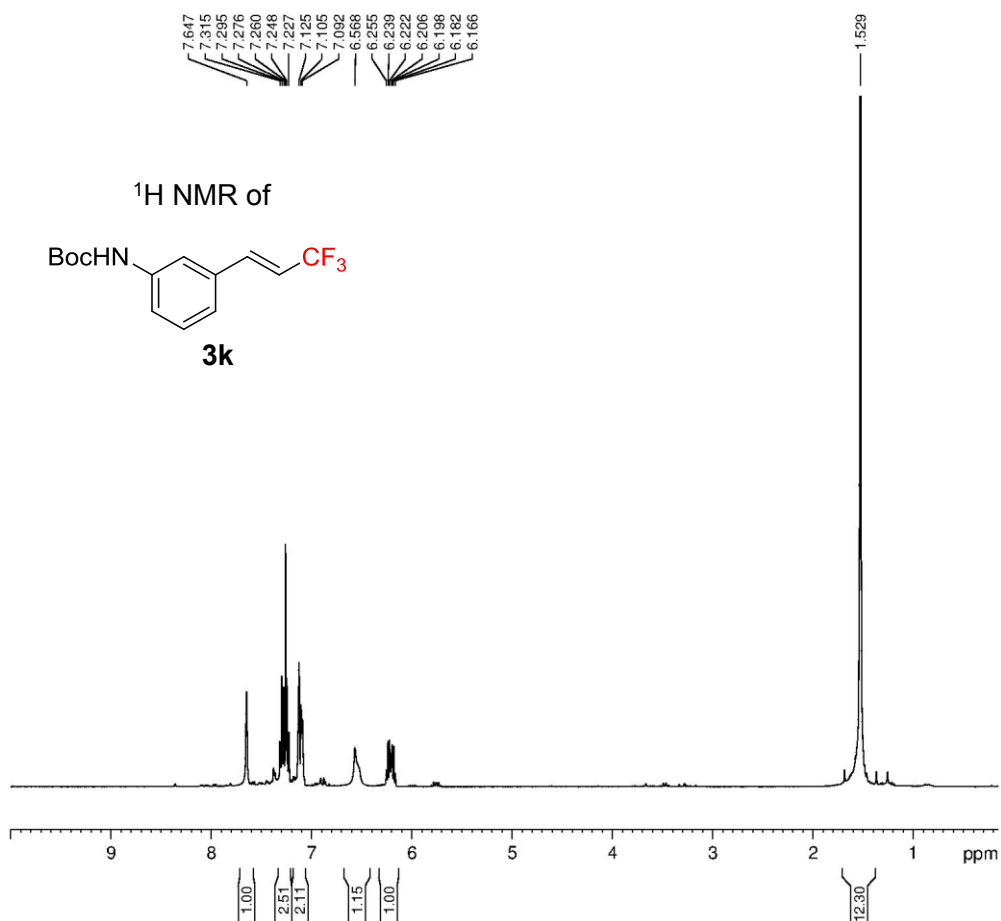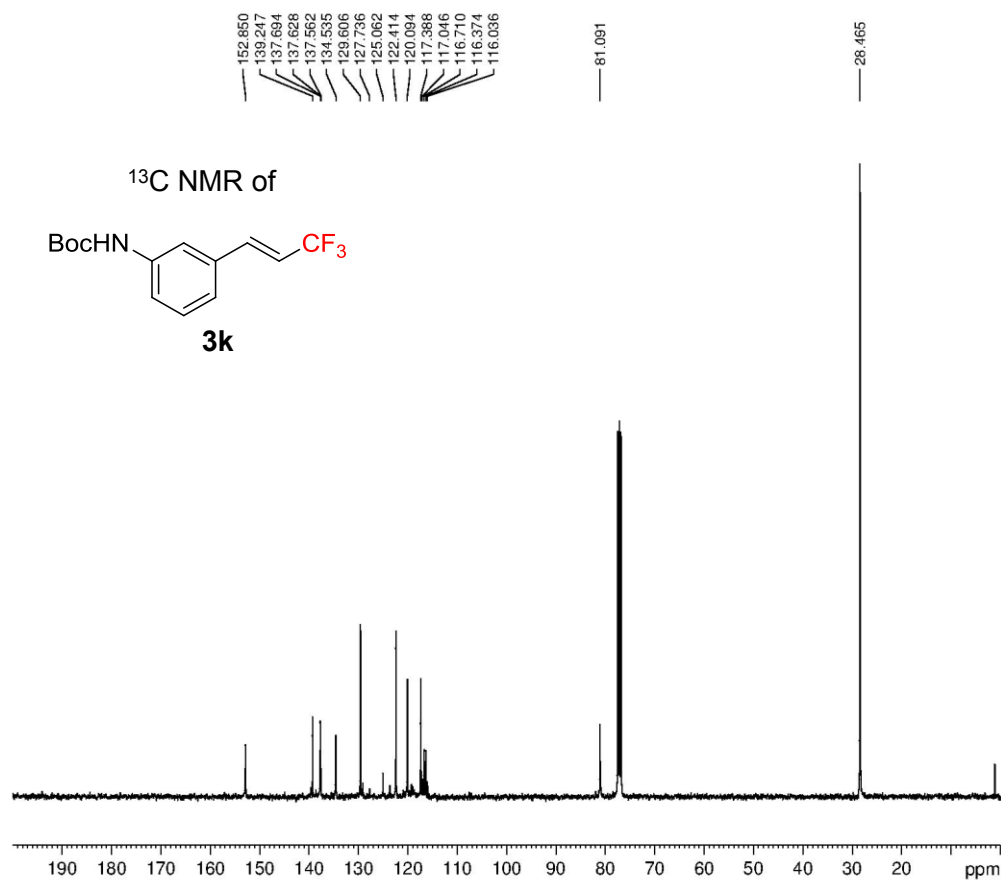

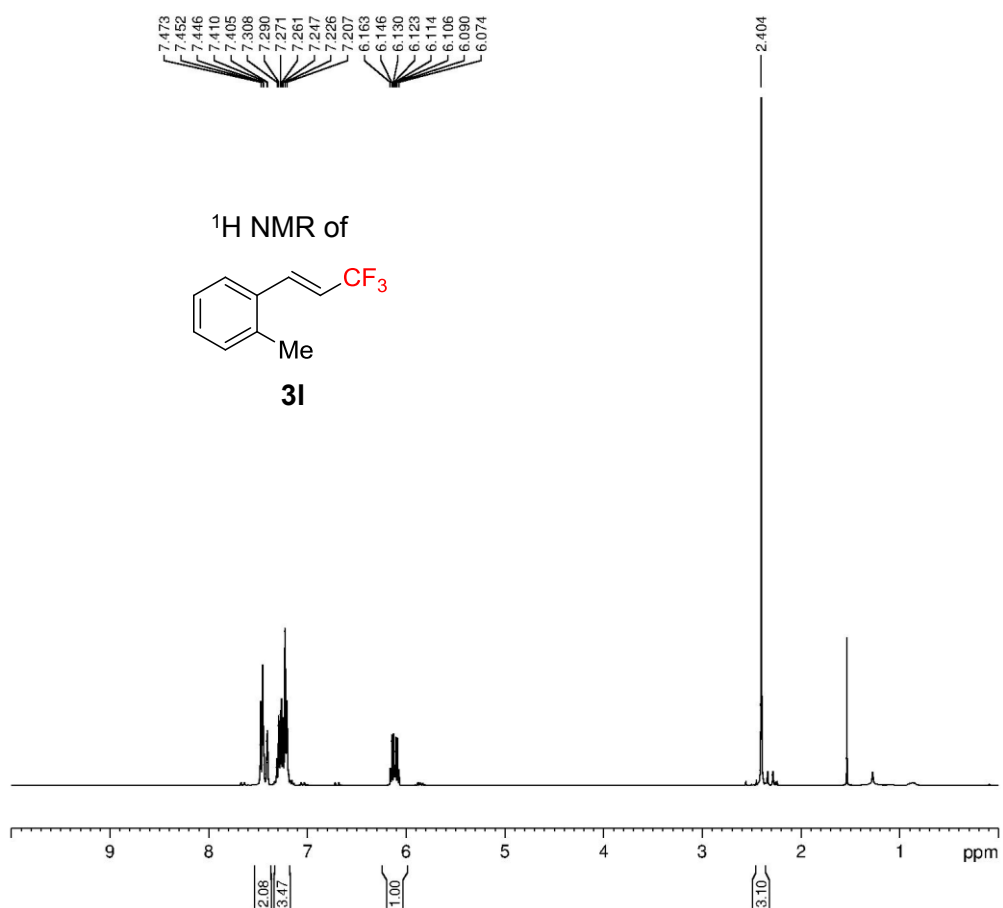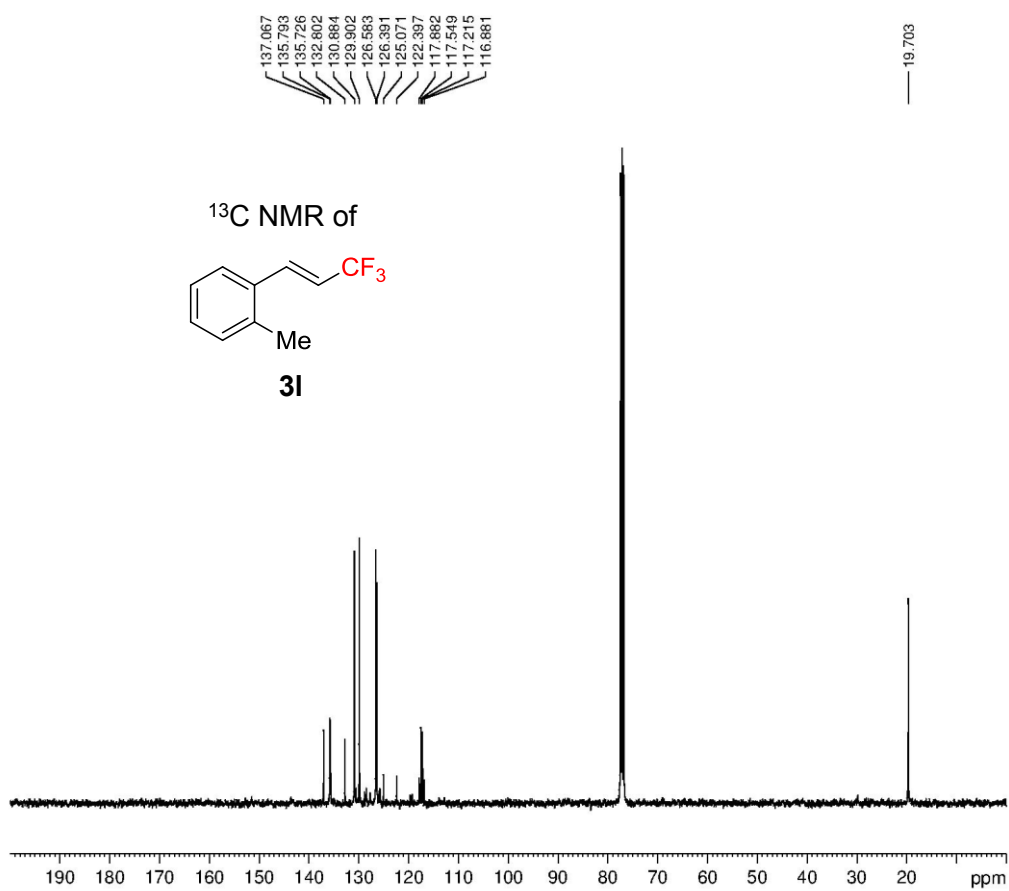



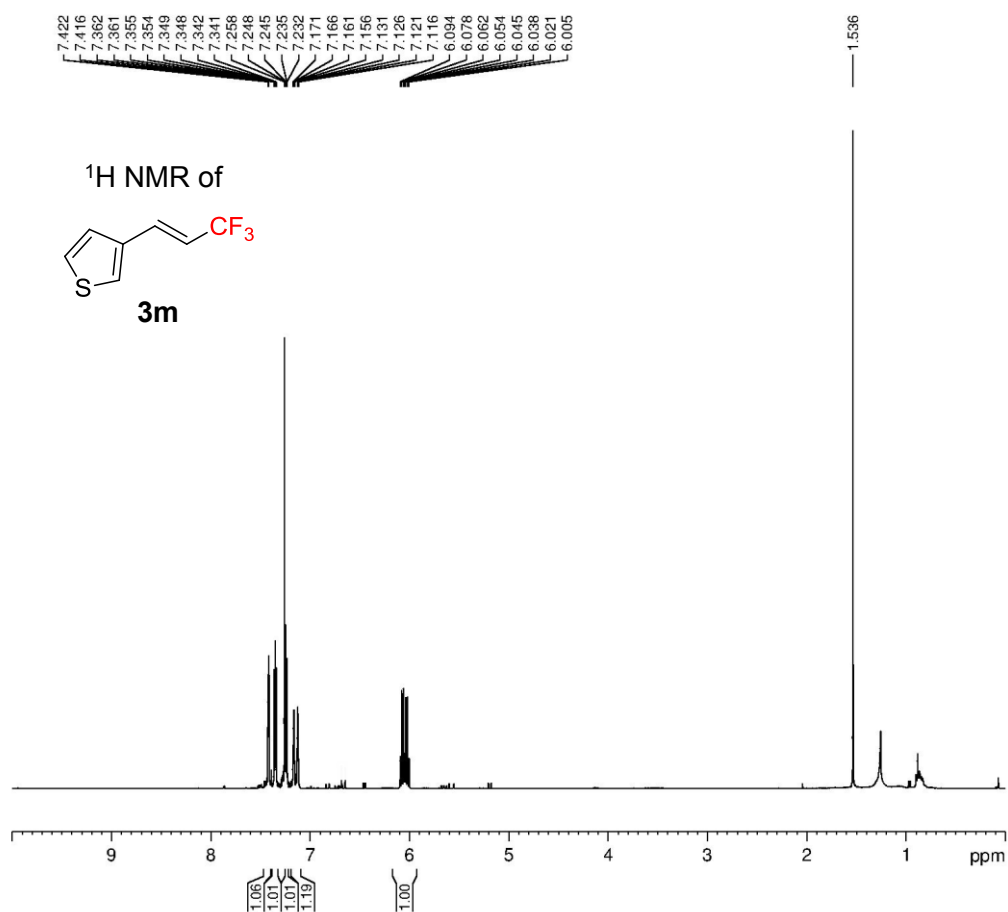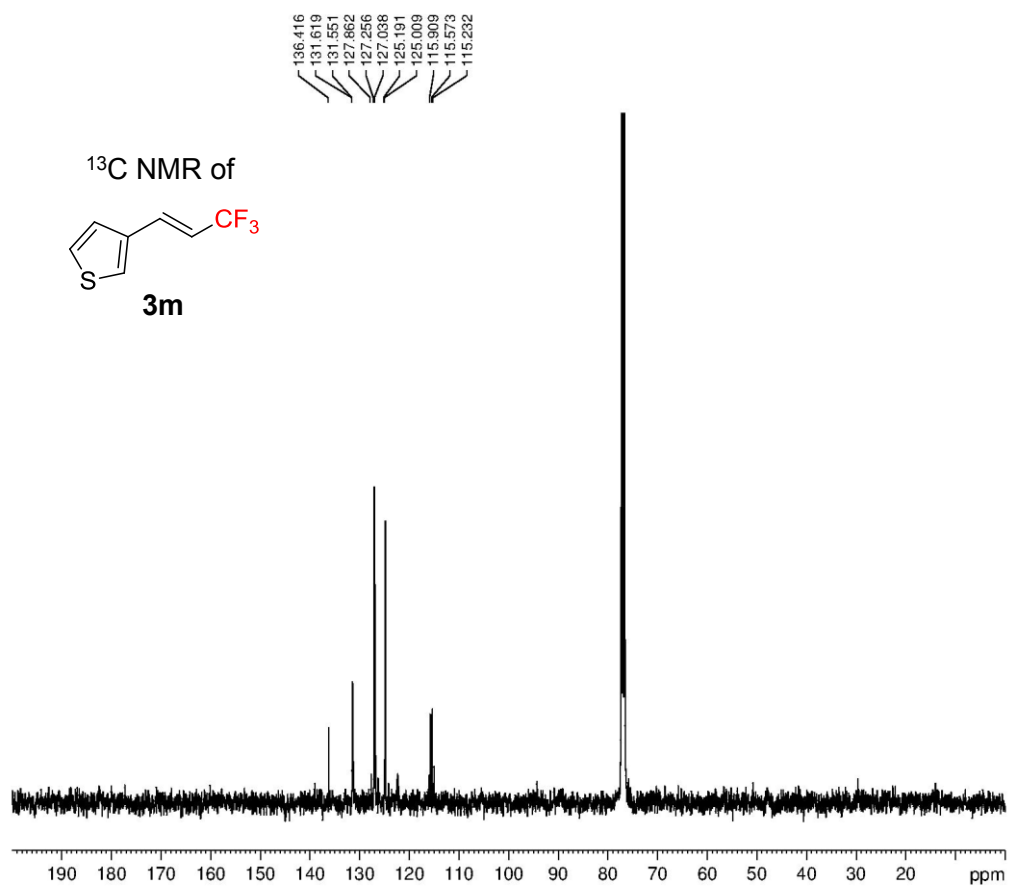

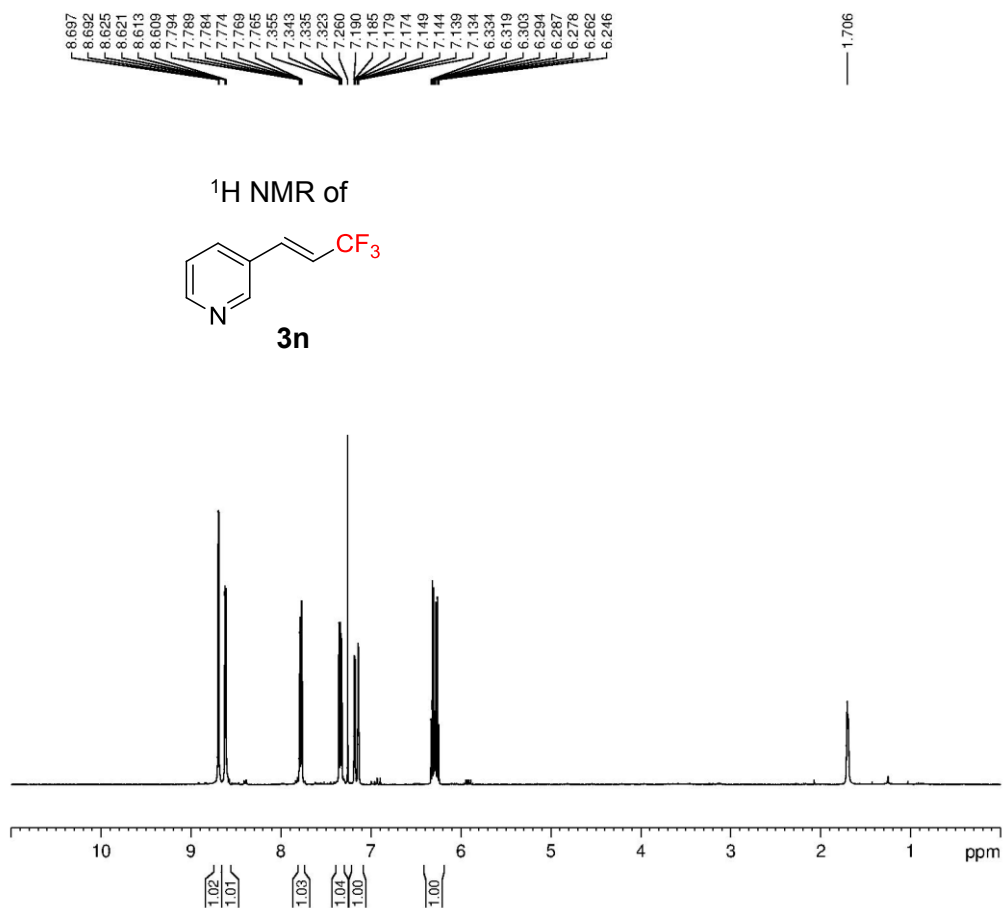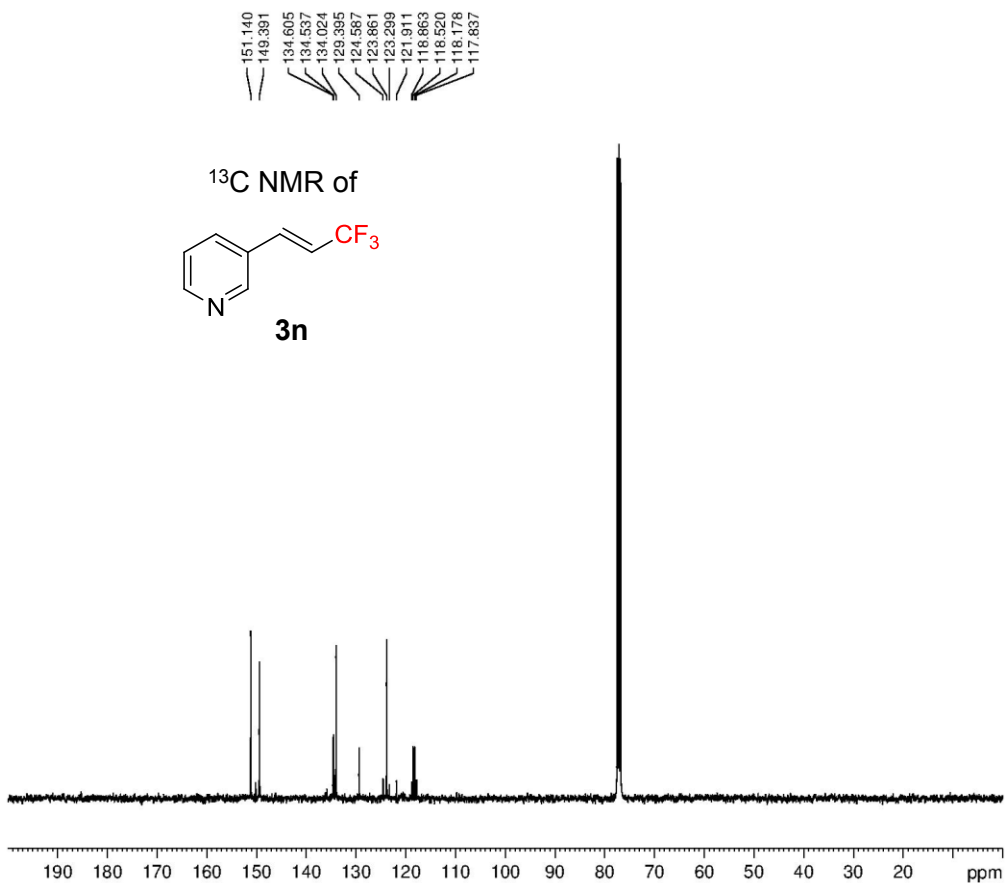

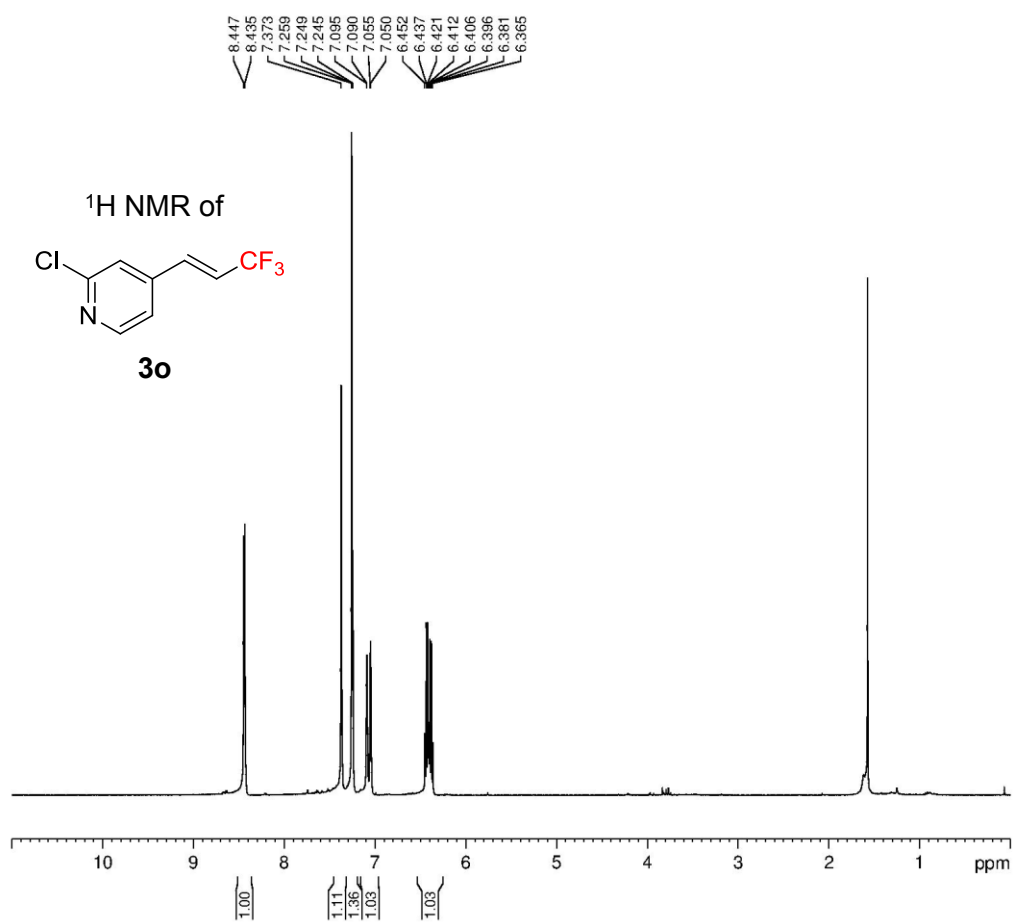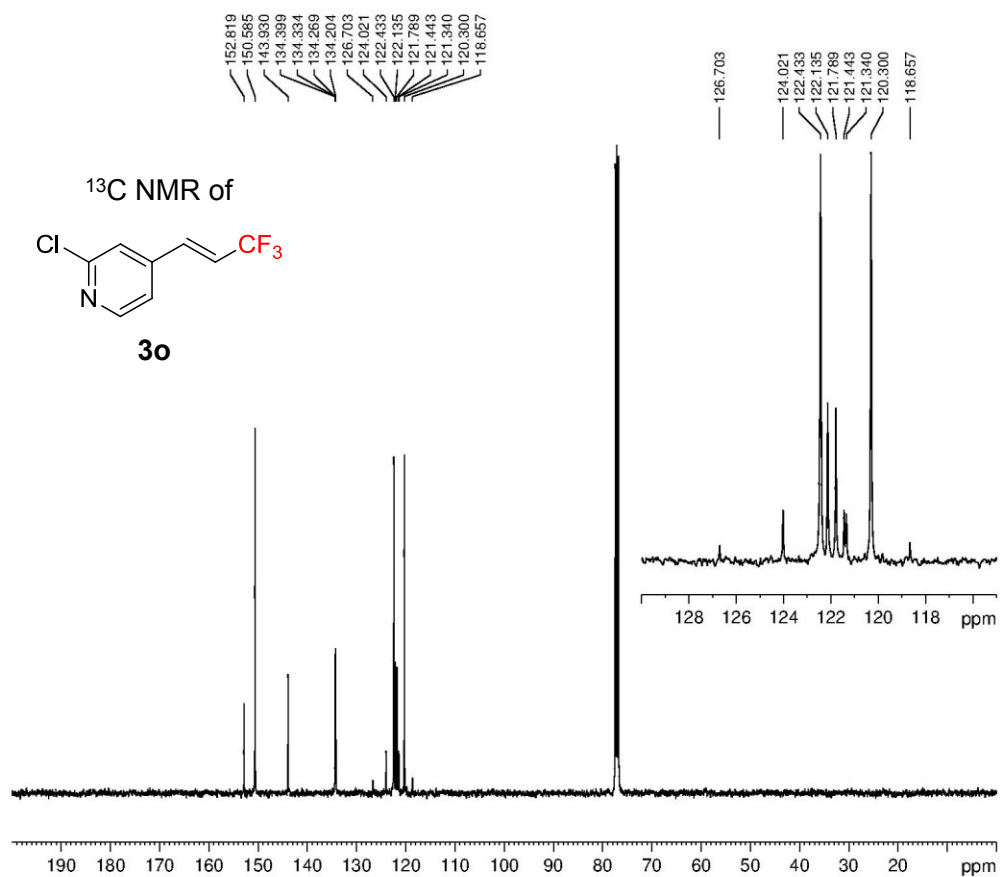

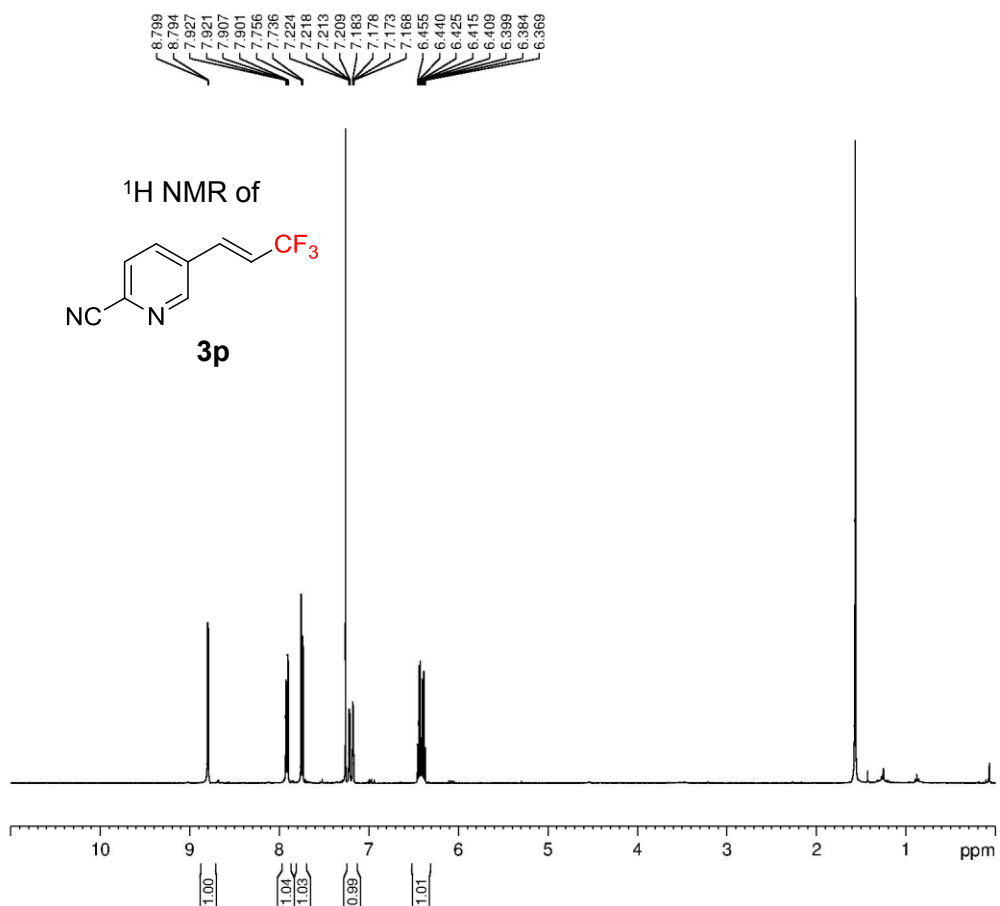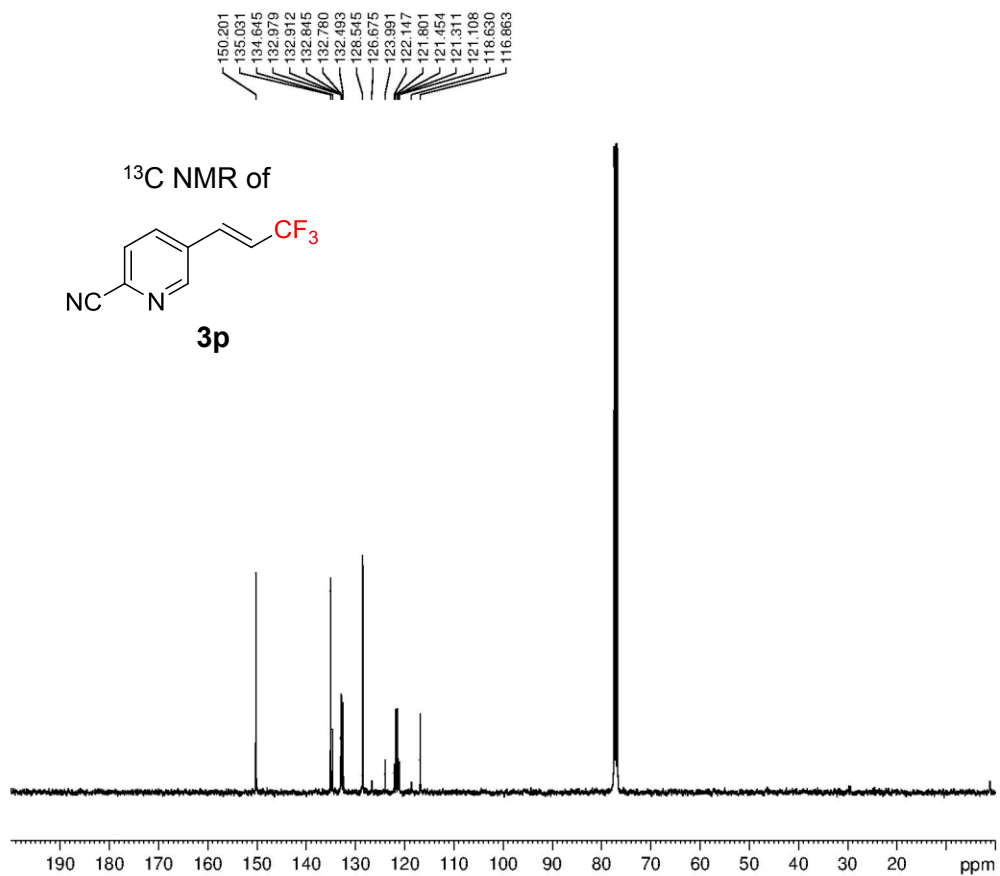

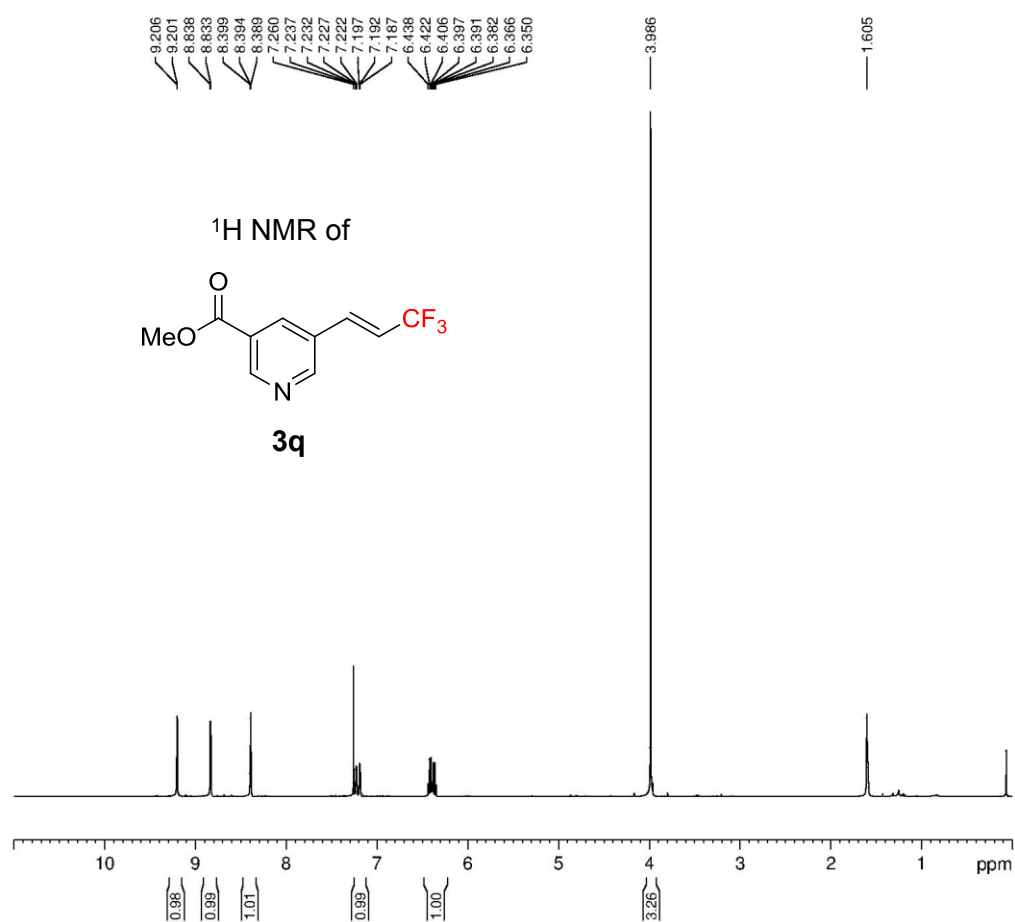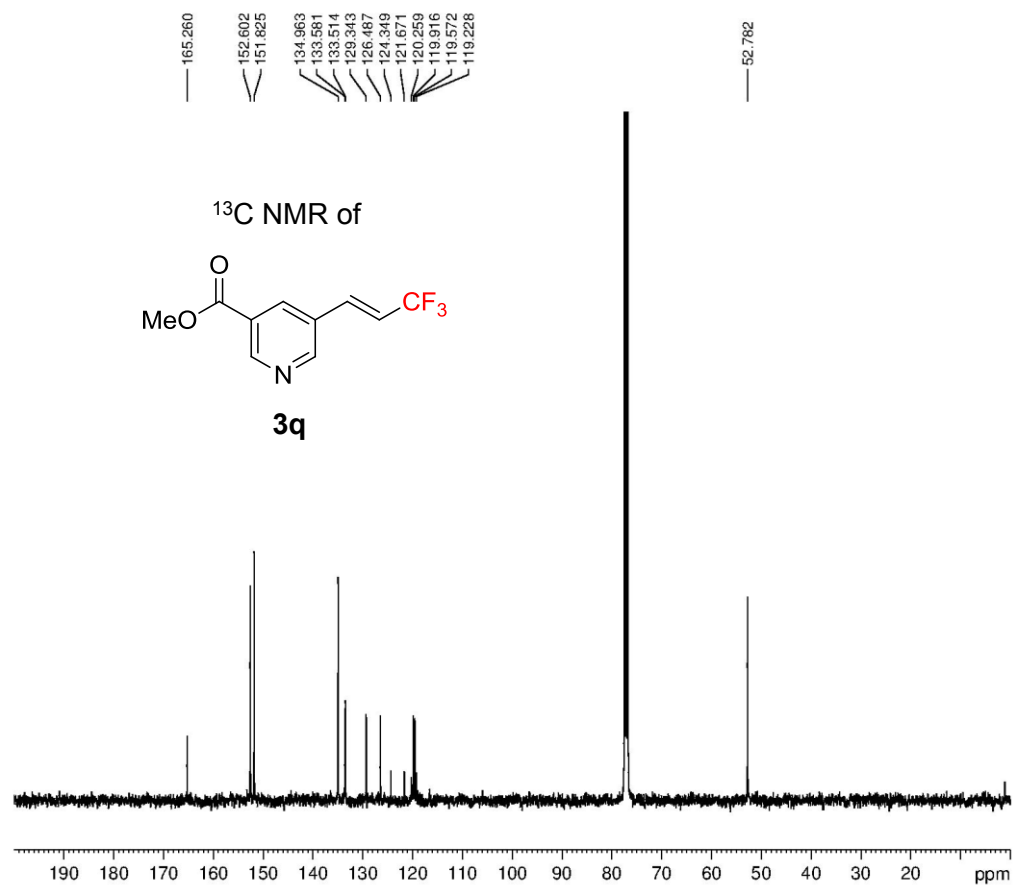

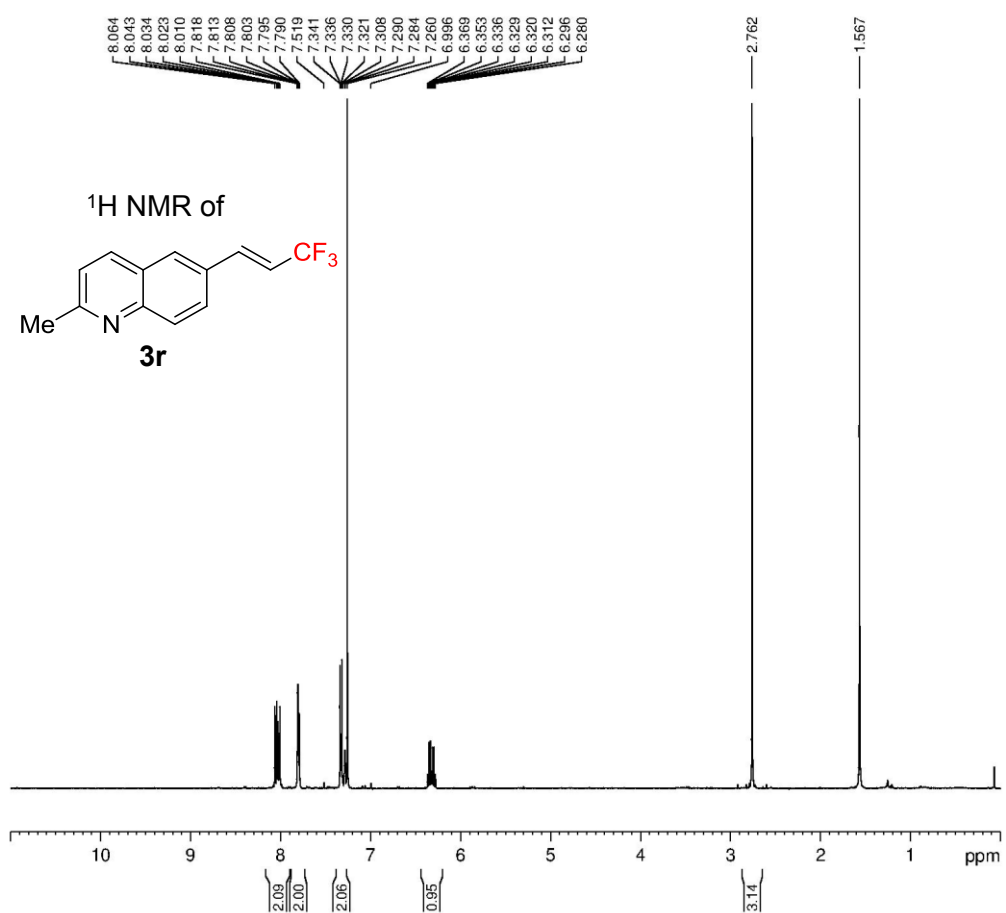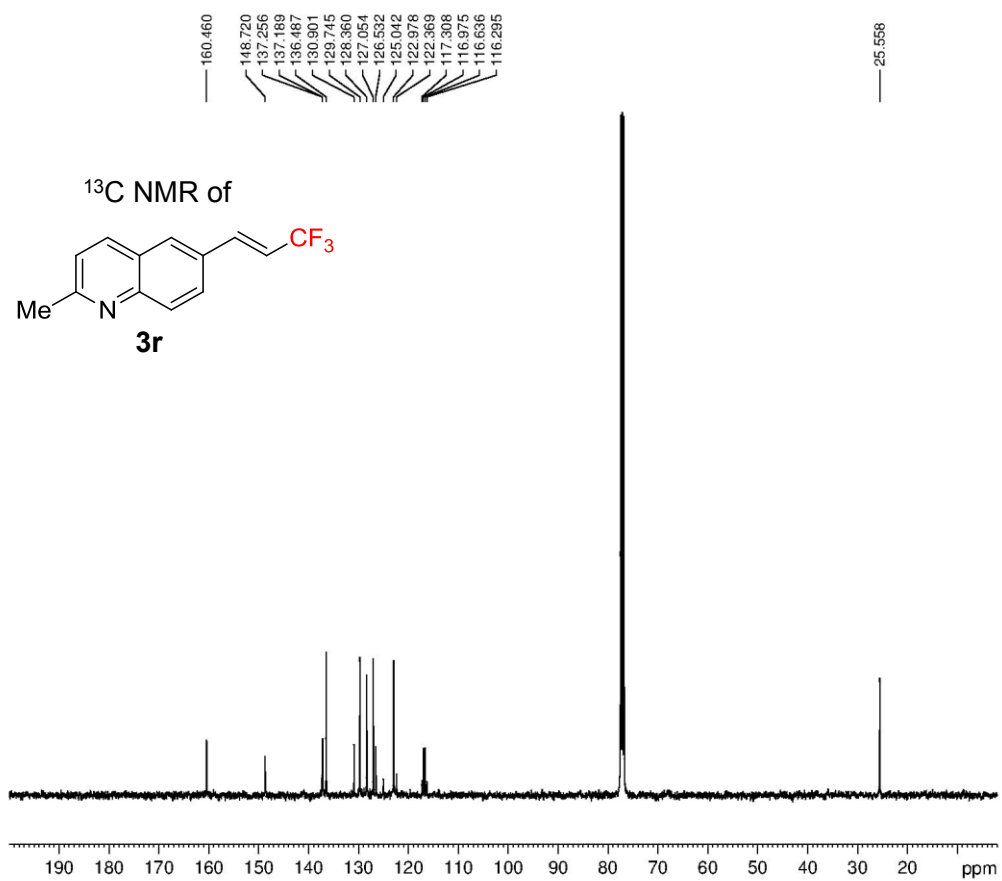

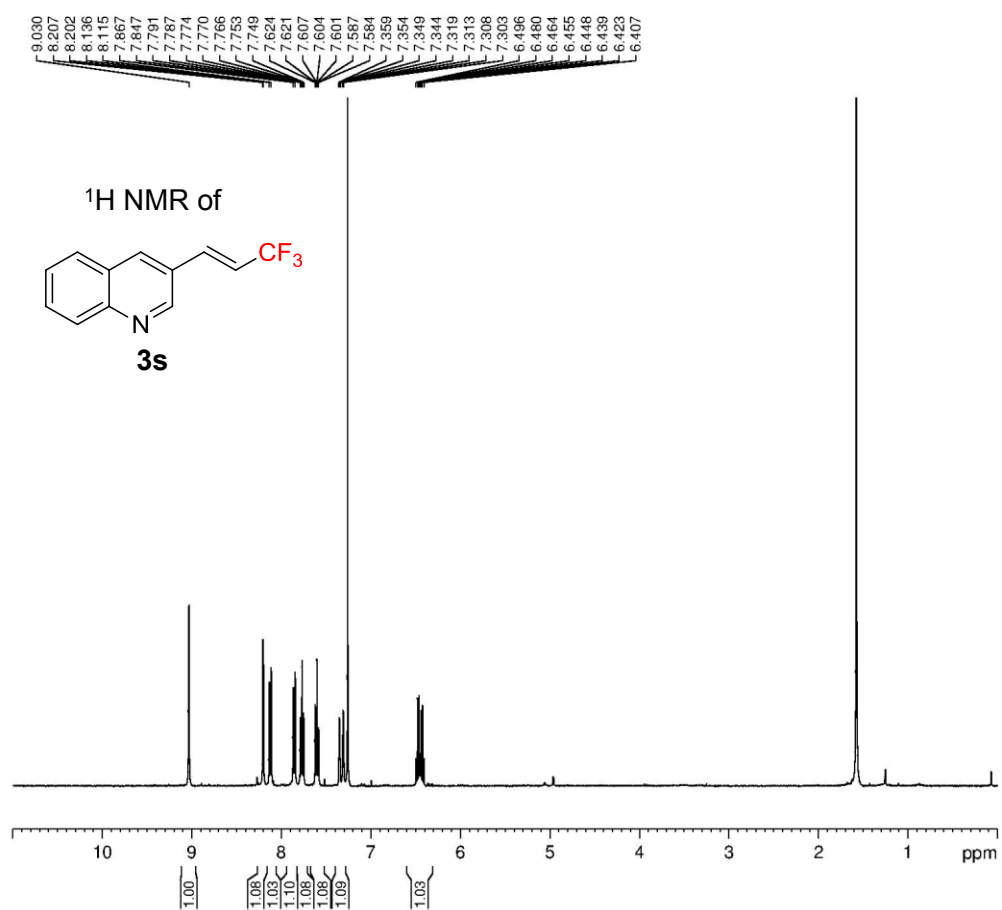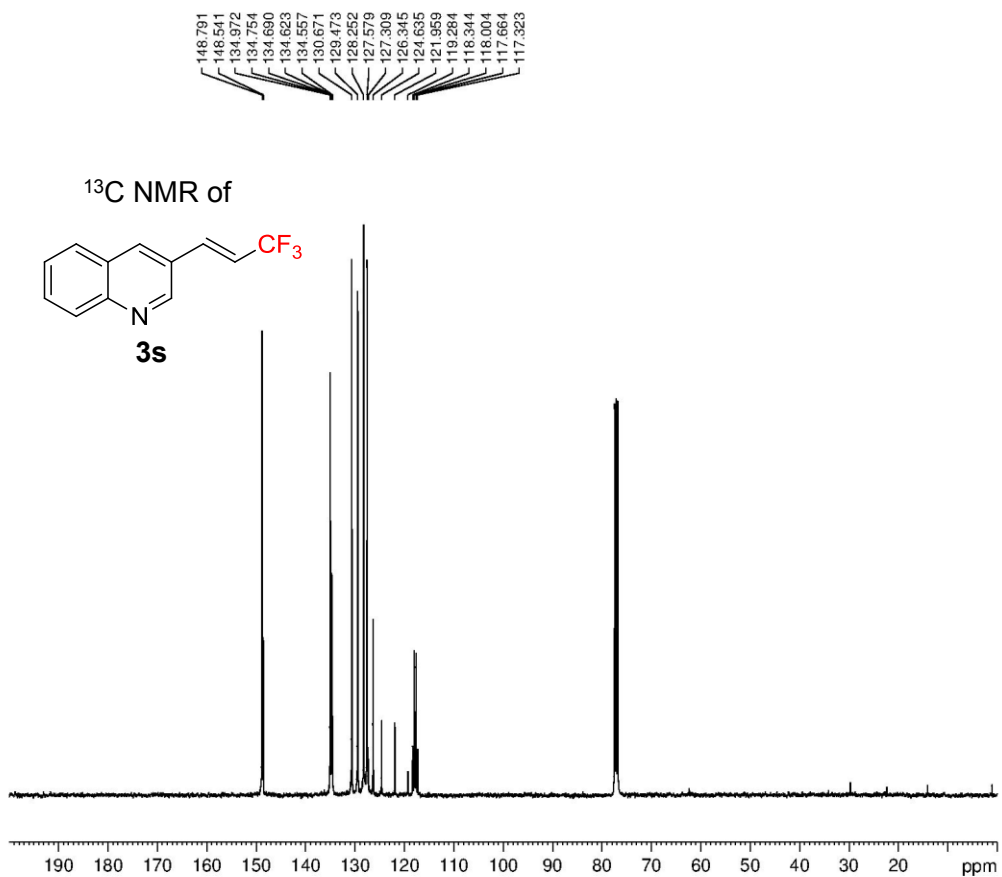

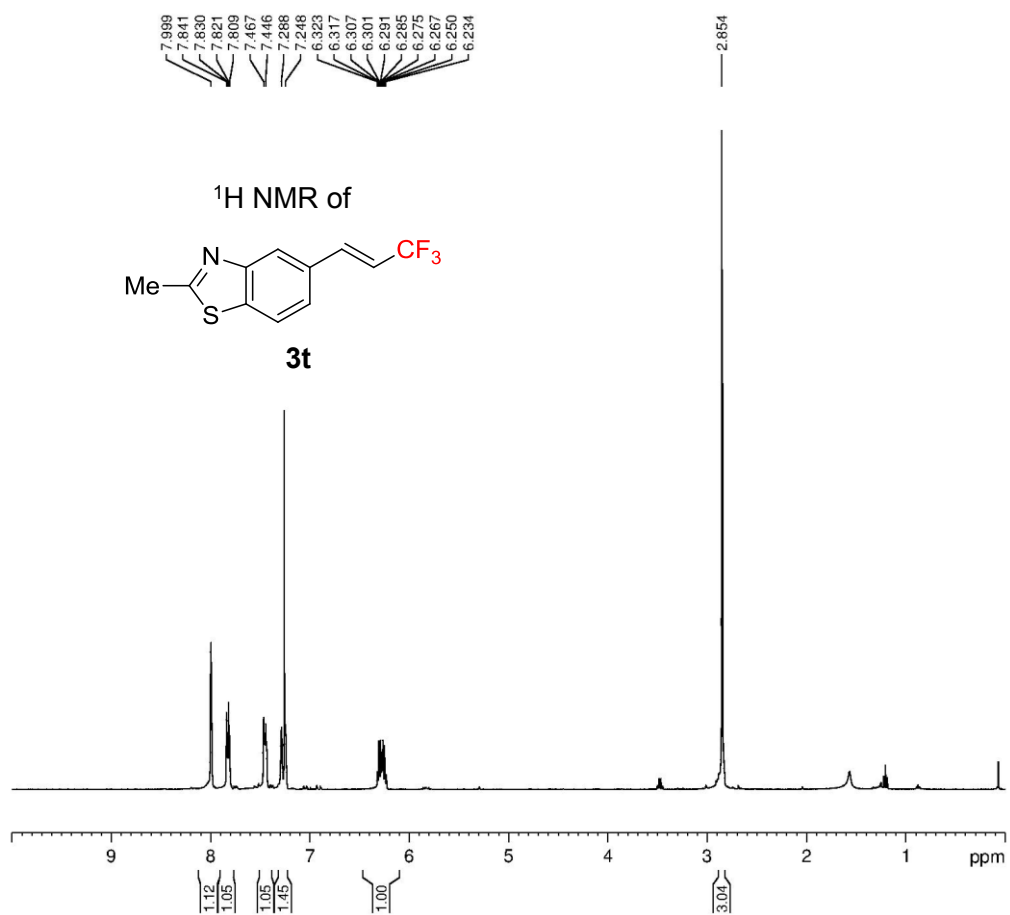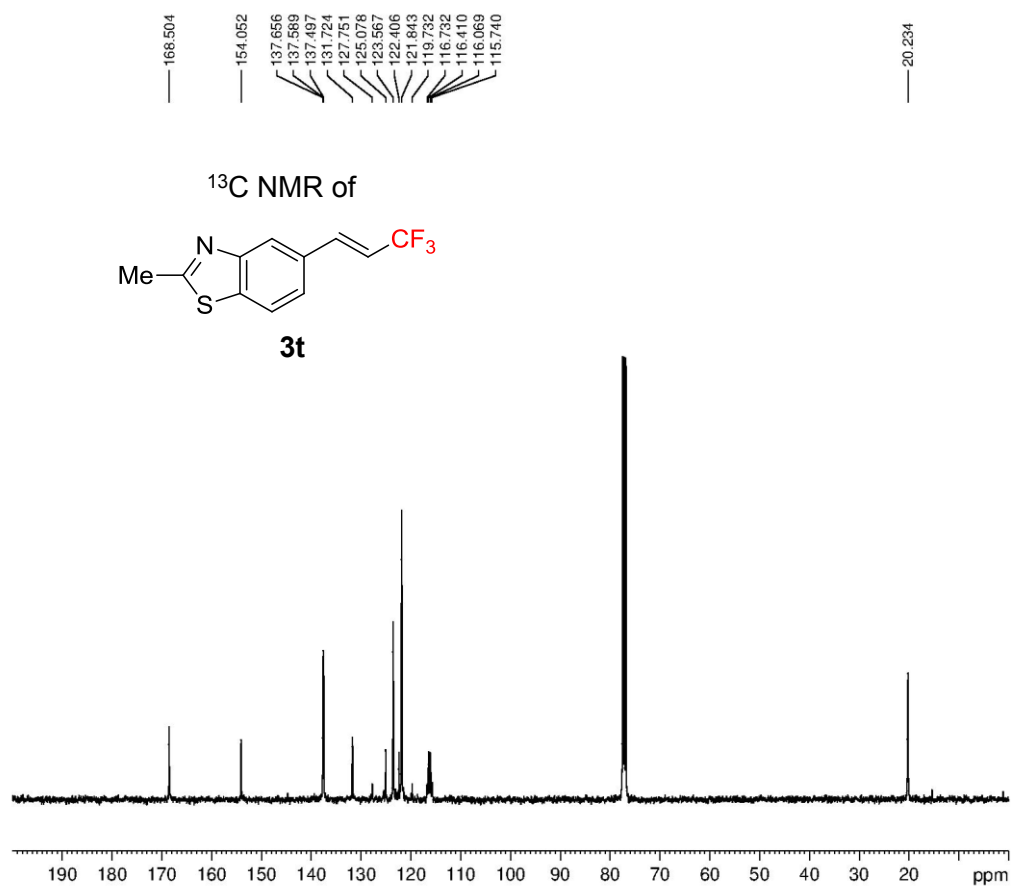



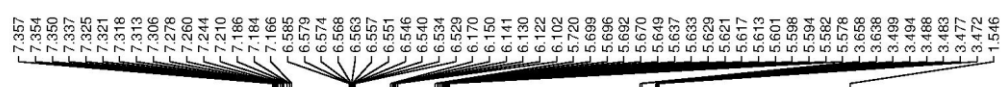

<sup>1</sup>H NMR of

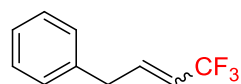

**3u**

*E/Z* = 65/35

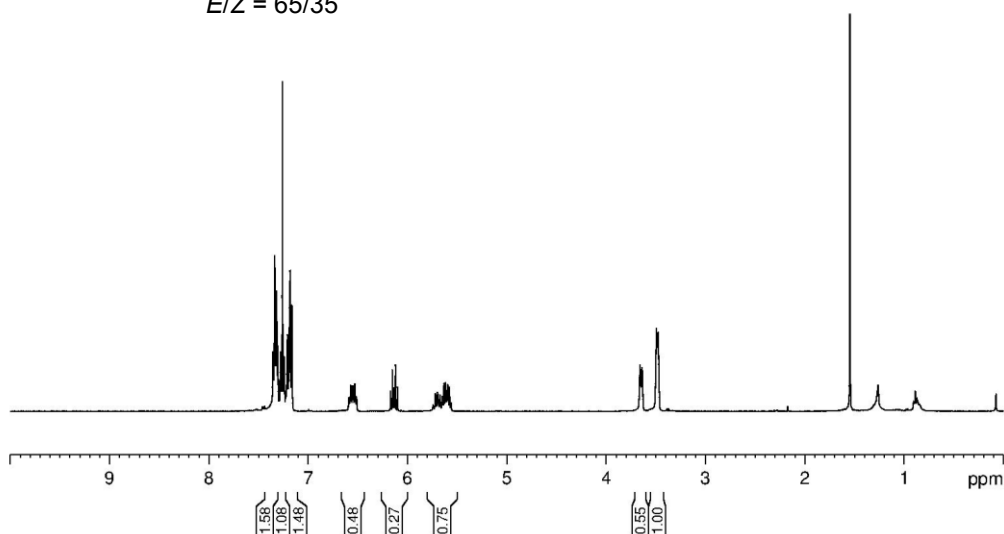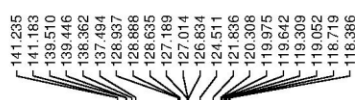

<sup>13</sup>C NMR of

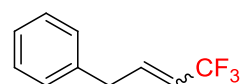

**3u**

*E/Z* = 65/35

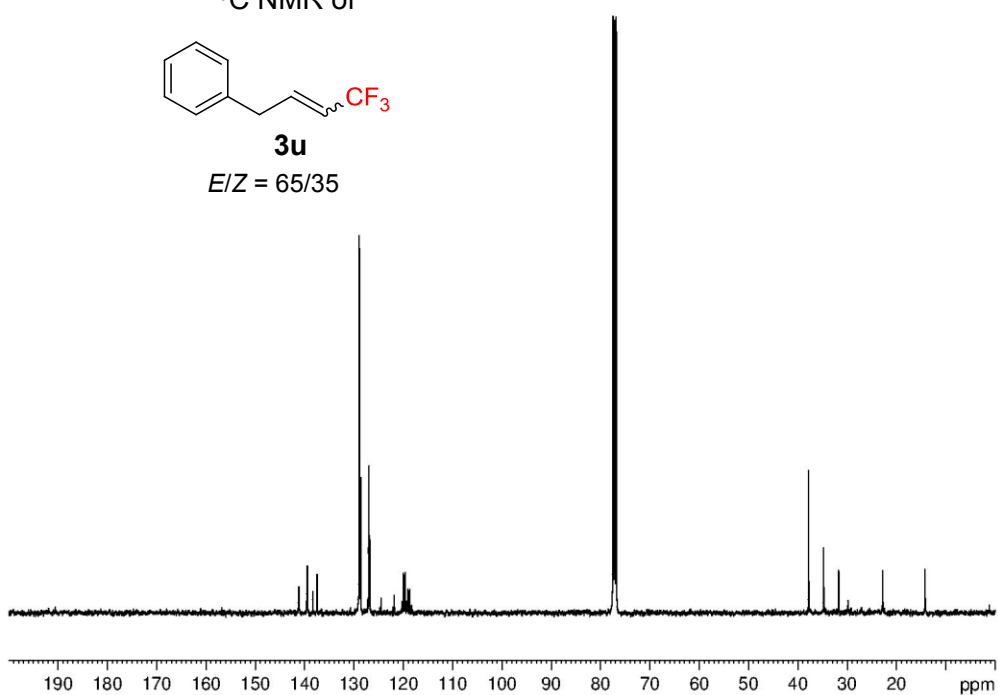

Supplement: c3cc39235j.pdf [file c3cc39235j.pdf]
